# Supplementary material for: A UK survey of rehabilitation following critical illness: implementation of NICE Clinical Guidance 83 (CG83) following hospital discharge
Source: PubMed Central journal article supplement — BMJ Open. 2014 May 15;4(5):e004963. doi: 10.1136/bmjopen-2014-004963 (PMC4025447; doi:10.1136/bmjopen-2014-004963), 2014-05-15
Supplement: bmjopen-2014-004963.draft_revisions.pdf [file bmjopen-2014-004963.draft_revisions.pdf]

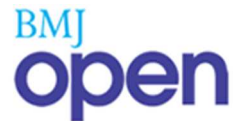

**A UK Survey of Rehabilitation Following Critical Illness: The Failure to Implement NICE Clinical Guidance 83 (CG83)**

|                                 |                                                                                                                                                                                                                                                                                                                                                                                                                                                                                                                           |
|---------------------------------|---------------------------------------------------------------------------------------------------------------------------------------------------------------------------------------------------------------------------------------------------------------------------------------------------------------------------------------------------------------------------------------------------------------------------------------------------------------------------------------------------------------------------|
| Journal:                        | <i>BMJ Open</i>                                                                                                                                                                                                                                                                                                                                                                                                                                                                                                           |
| Manuscript ID:                  | bmjopen-2014-004963                                                                                                                                                                                                                                                                                                                                                                                                                                                                                                       |
| Article Type:                   | Research                                                                                                                                                                                                                                                                                                                                                                                                                                                                                                                  |
| Date Submitted by the Author:   | 29-Jan-2014                                                                                                                                                                                                                                                                                                                                                                                                                                                                                                               |
| Complete List of Authors:       | Connolly, Bronwen; King's College London, Asthma, Allergy and Lung Biology<br>Douiri, Abdel; King's College London, Primary Care And Public Health Sciences<br>Steier, Joerg; Guy's & St.Thomas' NHS Foundation Trust, Lane Fox Clinical Respiratory Physiology Research Unit<br>Moxham, John; King's College London, Asthma, Allergy and Lung Biology<br>Denehy, Linda; The University of Melbourne, Physiotherapy, School of Health Sciences<br>Hart, Nicholas; King's College London, Asthma, Allergy and Lung Biology |
| <b>Primary Subject Heading</b>: | Intensive care                                                                                                                                                                                                                                                                                                                                                                                                                                                                                                            |
| Secondary Subject Heading:      | Evidence based practice, Epidemiology, Health policy, Rehabilitation medicine                                                                                                                                                                                                                                                                                                                                                                                                                                             |
| Keywords:                       | Adult intensive & critical care < ANAESTHETICS, Adult intensive & critical care < INTENSIVE & CRITICAL CARE, REHABILITATION MEDICINE                                                                                                                                                                                                                                                                                                                                                                                      |
|                                 |                                                                                                                                                                                                                                                                                                                                                                                                                                                                                                                           |

SCHOLARONE™  
Manuscripts

only

1  
2  
3 **A UK Survey of Rehabilitation Following Critical Illness: The Failure to Implement NICE**  
4  
5 **Clinical Guidance 83 (CG83)**  
6  
7  
8

9  
10 **B Connolly<sup>1, 2, 3</sup> Clinical Research Fellow, A Douiri<sup>4</sup> Lecturer in Medical Statistics, J Steier<sup>3</sup>**  
11  
12 **Consultant in Sleep and Respiratory Medicine, J Moxham<sup>1</sup> Professor of Respiratory**  
13  
14 **Medicine, L Denehy<sup>5</sup> Professor of Physiotherapy, N Hart<sup>1, 2, 3</sup> Consultant in Respiratory and**  
15  
16 **Critical Care Medicine**  
17  
18  
19

20  
21  
22 <sup>1</sup>Department of Asthma, Allergy & Respiratory Science

23  
24 Division of Asthma, Allergy and Lung Biology, King's College London

25  
26 5<sup>th</sup> Floor Tower Wing, Guy's Hospital

27  
28 London, SE1 9RT, UK

29  
30  
31 <sup>2</sup>Guy's & St Thomas' NHS Foundation Trust and King's College London

32  
33 National Institute of Health Research Biomedical Research Centre,

34  
35 16<sup>th</sup> Floor Tower Wing, Guy's Hospital

36  
37 London, SE1 9RT, UK

38  
39  
40 <sup>3</sup>Lane Fox Clinical Respiratory Physiology Research Unit

41  
42 St.Thomas' Hospital, Guy's & St.Thomas' NHS Foundation Trust

43  
44 Westminster Bridge Road,

45  
46 London, SE1 7EH, UK

47  
48  
49 <sup>4</sup>Department of Public Health Sciences

50  
51 King's College London

52  
53 5<sup>th</sup> Floor, Capital House

54  
55  
56  
57  
58  
59  
60  
61  
62  
63  
64  
65  
66  
67  
68  
69  
70  
71  
72  
73  
74  
75  
76  
77  
78  
79  
80  
81  
82  
83  
84  
85  
86  
87  
88  
89  
90  
91  
92  
93  
94  
95  
96  
97  
98  
99  
100  
101  
102  
103  
104  
105  
106  
107  
108  
109  
110  
111  
112  
113  
114  
115  
116  
117  
118  
119  
120  
121  
122  
123  
124  
125  
126  
127  
128  
129  
130  
131  
132  
133  
134  
135  
136  
137  
138  
139  
140  
141  
142  
143  
144  
145  
146  
147  
148  
149  
150  
151  
152  
153  
154  
155  
156  
157  
158  
159  
160  
161  
162  
163  
164  
165  
166  
167  
168  
169  
170  
171  
172  
173  
174  
175  
176  
177  
178  
179  
180  
181  
182  
183  
184  
185  
186  
187  
188  
189  
190  
191  
192  
193  
194  
195  
196  
197  
198  
199  
200  
201  
202  
203  
204  
205  
206  
207  
208  
209  
210  
211  
212  
213  
214  
215  
216  
217  
218  
219  
220  
221  
222  
223  
224  
225  
226  
227  
228  
229  
230  
231  
232  
233  
234  
235  
236  
237  
238  
239  
240  
241  
242  
243  
244  
245  
246  
247  
248  
249  
250  
251  
252  
253  
254  
255  
256  
257  
258  
259  
260  
261  
262  
263  
264  
265  
266  
267  
268  
269  
270  
271  
272  
273  
274  
275  
276  
277  
278  
279  
280  
281  
282  
283  
284  
285  
286  
287  
288  
289  
290  
291  
292  
293  
294  
295  
296  
297  
298  
299  
300  
301  
302  
303  
304  
305  
306  
307  
308  
309  
310  
311  
312  
313  
314  
315  
316  
317  
318  
319  
320  
321  
322  
323  
324  
325  
326  
327  
328  
329  
330  
331  
332  
333  
334  
335  
336  
337  
338  
339  
340  
341  
342  
343  
344  
345  
346  
347  
348  
349  
350  
351  
352  
353  
354  
355  
356  
357  
358  
359  
360  
361  
362  
363  
364  
365  
366  
367  
368  
369  
370  
371  
372  
373  
374  
375  
376  
377  
378  
379  
380  
381  
382  
383  
384  
385  
386  
387  
388  
389  
390  
391  
392  
393  
394  
395  
396  
397  
398  
399  
400  
401  
402  
403  
404  
405  
406  
407  
408  
409  
410  
411  
412  
413  
414  
415  
416  
417  
418  
419  
420  
421  
422  
423  
424  
425  
426  
427  
428  
429  
430  
431  
432  
433  
434  
435  
436  
437  
438  
439  
440  
441  
442  
443  
444  
445  
446  
447  
448  
449  
450  
451  
452  
453  
454  
455  
456  
457  
458  
459  
460  
461  
462  
463  
464  
465  
466  
467  
468  
469  
470  
471  
472  
473  
474  
475  
476  
477  
478  
479  
480  
481  
482  
483  
484  
485  
486  
487  
488  
489  
490  
491  
492  
493  
494  
495  
496  
497  
498  
499  
500  
501  
502  
503  
504  
505  
506  
507  
508  
509  
510  
511  
512  
513  
514  
515  
516  
517  
518  
519  
520  
521  
522  
523  
524  
525  
526  
527  
528  
529  
530  
531  
532  
533  
534  
535  
536  
537  
538  
539  
540  
541  
542  
543  
544  
545  
546  
547  
548  
549  
550  
551  
552  
553  
554  
555  
556  
557  
558  
559  
560  
561  
562  
563  
564  
565  
566  
567  
568  
569  
570  
571  
572  
573  
574  
575  
576  
577  
578  
579  
580  
581  
582  
583  
584  
585  
586  
587  
588  
589  
590  
591  
592  
593  
594  
595  
596  
597  
598  
599  
600  
601  
602  
603  
604  
605  
606  
607  
608  
609  
610  
611  
612  
613  
614  
615  
616  
617  
618  
619  
620  
621  
622  
623  
624  
625  
626  
627  
628  
629  
630  
631  
632  
633  
634  
635  
636  
637  
638  
639  
640  
641  
642  
643  
644  
645  
646  
647  
648  
649  
650  
651  
652  
653  
654  
655  
656  
657  
658  
659  
660  
661  
662  
663  
664  
665  
666  
667  
668  
669  
670  
671  
672  
673  
674  
675  
676  
677  
678  
679  
680  
681  
682  
683  
684  
685  
686  
687  
688  
689  
690  
691  
692  
693  
694  
695  
696  
697  
698  
699  
700  
701  
702  
703  
704  
705  
706  
707  
708  
709  
710  
711  
712  
713  
714  
715  
716  
717  
718  
719  
720  
721  
722  
723  
724  
725  
726  
727  
728  
729  
730  
731  
732  
733  
734  
735  
736  
737  
738  
739  
740  
741  
742  
743  
744  
745  
746  
747  
748  
749  
750  
751  
752  
753  
754  
755  
756  
757  
758  
759  
760  
761  
762  
763  
764  
765  
766  
767  
768  
769  
770  
771  
772  
773  
774  
775  
776  
777  
778  
779  
780  
781  
782  
783  
784  
785  
786  
787  
788  
789  
790  
791  
792  
793  
794  
795  
796  
797  
798  
799  
800  
801  
802  
803  
804  
805  
806  
807  
808  
809  
810  
811  
812  
813  
814  
815  
816  
817  
818  
819  
820  
821  
822  
823  
824  
825  
826  
827  
828  
829  
830  
831  
832  
833  
834  
835  
836  
837  
838  
839  
840  
841  
842  
843  
844  
845  
846  
847  
848  
849  
850  
851  
852  
853  
854  
855  
856  
857  
858  
859  
860  
861  
862  
863  
864  
865  
866  
867  
868  
869  
870  
871  
872  
873  
874  
875  
876  
877  
878  
879  
880  
881  
882  
883  
884  
885  
886  
887  
888  
889  
890  
891  
892  
893  
894  
895  
896  
897  
898  
899  
900  
901  
902  
903  
904  
905  
906  
907  
908  
909  
910  
911  
912  
913  
914  
915  
916  
917  
918  
919  
920  
921  
922  
923  
924  
925  
926  
927  
928  
929  
930  
931  
932  
933  
934  
935  
936  
937  
938  
939  
940  
941  
942  
943  
944  
945  
946  
947  
948  
949  
950  
951  
952  
953  
954  
955  
956  
957  
958  
959  
960  
961  
962  
963  
964  
965  
966  
967  
968  
969  
970  
971  
972  
973  
974  
975  
976  
977  
978  
979  
980  
981  
982  
983  
984  
985  
986  
987  
988  
989  
990  
991  
992  
993  
994  
995  
996  
997  
998  
999  
1000

1  
2  
3 London, SE1 3QD, UK  
4

5<sup>5</sup>Department of Physiotherapy  
6

7 School of Health Sciences, University of Melbourne  
8

9  
10 Parkville, 3010, Melbourne, Australia  
11

12  
13  
14  
15 **Corresponding author**  
16

17 Bronwen Connolly  
18

19 Research Office, Lane Fox Respiratory Unit  
20

21 Ground Floor, South Wing  
22

23 St.Thomas' Hospital, Guy's & St.Thomas' NHS Foundation Trust  
24

25 Westminster Bridge Road  
26

27  
28 London, SE1 7EH, UK  
29

30  
31 Tel: +44 20 7188 8070  
32

33  
34 Email: [bronwen.connolly@nhs.net](mailto:bronwen.connolly@nhs.net)  
35

36  
37  
38 **Word Count** 4075  
39

40  
41  
42  
43 **Key words**  
44

45 Critical illness, rehabilitation, guidelines, implementation, survey  
46  
47  
48  
49  
50  
51  
52  
53  
54  
55  
56  
57  
58  
59  
60

**ABSTRACT****Objective**

To determine the implementation of National Institute for Health and Clinical Excellence guidance (NICE CG83) for post hospital discharge critical illness follow-up and rehabilitation programmes.

**Design**

Closed-question postal survey.

**Setting**

Adult intensive care units (ICU), across the UK, identified from national databases of organisations. Specialist-only and private ICUs were not included.

**Participants**

Senior respiratory critical care physiotherapy clinicians.

**Results**

A representative sample of 182 surveys were returned from 240 distributed (75.8% (95%CI 70.4-81.2)). Only 48 organisations (27.3% (95%CI 20.7 to 33.9)) offered a follow-up service 2-3 months following hospital discharge, the majority (n=39, 84.8%) in clinic format. Twelve organisations reported post hospital discharge rehabilitation programmes (6.8% (95%CI 3.1 to 10.5)), albeit only ten of these operated on a regular basis. Lack of funding was reported as both the most frequent (n=149/164, 90.0%) and main barrier (n=99/156, 63.5%) to providing services. Insufficient resources (n=71/164, 43.3%) and lack of priority by the clinical management team (n=66/164, 40.2%) were also highly cited barriers to service delivery.

**Conclusion**

1  
2  
3 NICE CG83 has been successful in profiling the importance of rehabilitation for survivors of  
4  
5 critical illness. However, four years following publication of CG83 there has been limited  
6  
7 development of this clinical service across the UK. Strategies to support delivery of such  
8  
9 quality improvement programmes are urgently required to enhance patient care.  
10  
11  
12  
13

#### 14 **Word Count**

15  
16  
17 216  
18  
19  
20  
21

#### 22 **Article summary**

##### 23 **Strengths and limitations of this study**

- 24  
25  
26 • This is the largest, and most comprehensive survey conducted across the UK of post  
27  
28 hospital discharge follow-up and rehabilitation for survivors of critical illness  
29  
30
- 31  
32 • Data from this survey indicate a low reported prevalence of available services, with  
33  
34 barriers to service implementation reported by clinicians examined in detail  
35  
36
- 37  
38 • This survey was profession-specific, directed only to physiotherapy clinicians rather  
39  
40 than multiple members of the interdisciplinary team  
41  
42
- 43  
44 • Specialist-only and private organisations were excluded, which may have provided  
45  
46 additional, potentially beneficial data  
47  
48  
49  
50  
51  
52  
53  
54  
55  
56  
57  
58  
59  
60

## INTRODUCTION

Intensive care unit (ICU) admission with critical illness can have catastrophic and often long-term consequences for survivors. Physical and psychological impairments including reduced exercise capacity and health-related quality of life can persist for many years following hospital discharge [1-4]. These features are now referred to as the 'post intensive care syndrome' [5]. In recent years the importance of survivorship, or quality of survival, has been increasingly recognised [6], and the role of rehabilitation interventions to facilitate the recovery pathway of patients have become a major focus for the clinician [7].

In the UK, the National Institute of Health and Clinical Excellence (NICE) in 2009 published clinical guideline 83 (CG83) focussed on 'Rehabilitation After Critical Illness'. This profiled the importance of this area of clinical practice aiming to improve the standards of care and previously unmet clinical needs of this patient group. NICE CG83 advocated a continuum of multidisciplinary rehabilitation along the recovery pathway from within the ICU to the ward and following hospital discharge [8]. Despite the intentions, widespread clinical implementation of these guidelines has been challenged by the limited evidence underpinning the recommendations, as well as sparse detail provided to characterise the optimum type, intensity, frequency and duration of exercise therapy and rehabilitation interventions [9]. Furthermore, critical care survivors experience inadequate and disjointed multidisciplinary care following hospital discharge with inconsistent service provision, which can be strongly influenced by local resources and geographical location [10].

Failure to implement national guidelines or respond to published evidence is not uncommon. Disparity between the prevalence of conditions such as chronic

1  
2  
3 cardiorespiratory disease, diabetes mellitus and sleep-related disorders, and availability of  
4  
5 recommended services for their management, is evident across the UK [11-13]. Previous  
6  
7 surveys relating to provision of critical care rehabilitation have focussed on ICU follow-up  
8  
9 [14] or physiotherapy practice within the ICU [15-17]. Two recent surveys reported on NICE  
10  
11 CG83, but these were limited in content and detail [18 19]. The aim of the current study  
12  
13 was to comprehensively determine, across the UK, implementation of NICE CG83 during the  
14  
15 post hospital discharge period with detailed characterisation of available follow-up and  
16  
17 rehabilitation services, and including establishing barriers to service provision.  
18  
19  
20  
21  
22  
23

## 24 **METHODS**

25  
26 Details for all adult ICUs across the UK (England, Scotland, Wales and Northern Ireland) were  
27  
28 obtained via two central registries; the Intensive Care National Audit and Research Centre  
29  
30 (ICNARC) and the Scottish Intensive Care Society Audit Group (SICSAG). A total of 240  
31  
32 organisations were identified. Specialist-only and private ICUs were excluded were from  
33  
34 survey.  
35  
36  
37  
38  
39

40  
41 The authors designed a predominantly closed-question survey (available from the  
42  
43 corresponding author) to evaluate clinical practice regarding follow-up and rehabilitation  
44  
45 services for survivors of critical illness post hospital discharge. Demographic details were  
46  
47 requested regarding number, type and bed-capacity of critical care areas at each  
48  
49 organisation. In addition, detail of service provision including follow-up, content, delivery  
50  
51 and evaluation of rehabilitation programmes was requested, and barriers to offering  
52  
53 services were sought if none were currently in operation. The majority of questions allowed  
54  
55 respondents to select from multiple options with space available for free-text comments  
56  
57  
58  
59  
60

1  
2  
3 throughout. These options were not ranked, nor were respondents asked to mark their  
4  
5 response in terms of perceived importance or grading, with the exception of asking  
6  
7 respondents to detail the main limiting barrier to service availability. The survey was piloted  
8  
9 using three senior clinicians and clinical-academics (ICU clinical experience ranging 7-14  
10  
11 years) at two tertiary referral university teaching hospitals in London, UK. Constructive  
12  
13 critique of survey design, content, structure, user-acceptability and time for completion was  
14  
15 requested, following which further refinement was undertaken.  
16  
17  
18  
19  
20

21  
22 In March 2013, the survey and a covering letter of invitation to participate were distributed  
23  
24 by post to the senior physiotherapist for critical care at each of the organisations with an  
25  
26 included ICU. Stamped, self-addressed envelopes (SAEs) were enclosed for return of  
27  
28 completed surveys. Surveys were coded to identify responses. Throughout the period of  
29  
30 survey distribution a variety of strategies were employed to assist with survey promotion  
31  
32 and enhance rates of completion and return. Six weeks following initial survey distribution,  
33  
34 a reminder letter was sent by post to non-responders with a second copy of the survey and  
35  
36 further SAEs. A further six weeks later, telephone calls were made to remaining non-  
37  
38 responders. Direct contact was attempted with the senior critical care physiotherapist to  
39  
40 determine willingness to participate, who were offered the choice of telephone or email  
41  
42 completion of the survey. Respondents were also contacted via email or telephone if there  
43  
44 were missing data.  
45  
46  
47  
48  
49  
50

### 51 52 **Data Handling**

53  
54  
55 In line with guidance produced by the UK National Research Ethics Service (available at  
56  
57 <http://www.nres.nhs.uk/>) the project was deemed an evaluation of service provision, and  
58  
59  
60



1  
2  
3 therefore ethical approval was not required. Completion and return of the survey was  
4  
5 considered indicative of willingness to participate in the survey and implied consent. All  
6  
7 data were stored in standard spreadsheets, transcribed from hard copies of returned  
8  
9 surveys. Due to the nature of the study and data collected, descriptive statistics were used  
10  
11 to analyse quantitative responses including number, percentage and 95% confidence  
12  
13 intervals where appropriate, and additional qualitative review of free-text comments made.  
14  
15 A response rate of 65% rate was considered *a priori* to provide a representative sample.  
16  
17  
18  
19  
20  
21

## 22 RESULTS

### 23 Responding institutions

24  
25 One hundred and eighty-two of the 240 distributed surveys were returned, indicating a  
26  
27 75.8% (95%CI 70.4 to 81.2) response rate (*Figure 1*). One survey was returned blank with  
28  
29 the respondent indicating that they lacked sufficient time for completion. Demographic  
30  
31 data for the hospitals surveyed are reported in *Table 1*. The majority were district general  
32  
33 (DG) hospitals with ICUs and high dependency units (HDUs) managing mixed general  
34  
35 medical and surgical patient casemixes. A large number of responses reported  
36  
37 'combination' units accepting both Level 3 and 2 patients (*Table 2*).  
38  
39  
40  
41  
42  
43  
44

45 Five respondents indicated that available rehabilitation programmes at their organisations  
46  
47 were the direct result of active research studies (*Figure E1, Data Supplement*). These  
48  
49 responses were excluded as the aim of the survey was to characterise current clinical  
50  
51 practice rather than research activity. These five respondents completed the section asking  
52  
53 for barriers to offering a clinical service had the research study not been implemented.  
54  
55  
56  
57  
58  
59  
60

**Table 1.** Demographics of organisations

| Characteristic                                                                       | n (%)      |
|--------------------------------------------------------------------------------------|------------|
| Response rate according to UK country                                                |            |
| England                                                                              | 145 (75.1) |
| Scotland                                                                             | 20 (87.0)  |
| Wales                                                                                | 12 (80.0)  |
| Northern Ireland                                                                     | 5 (55.6)   |
| Type of hospital                                                                     |            |
| University teaching                                                                  | 66 (36.5)  |
| District general                                                                     | 115 (63.5) |
| Total number of Critical Care Units*                                                 |            |
| Level 3 (ICU)                                                                        | 112        |
| Level 2 (HDU)                                                                        | 170        |
| Combination Level 3 and 2 units                                                      | 98         |
| Total number of Critical Care Beds*                                                  |            |
| Level 3 (ICU)                                                                        | 1007       |
| Level 2 (HDU)                                                                        | 1090       |
| Combination Level 3 and 2 units                                                      | 1354       |
| Frequency of reported types of patients admitted to Critical Care Unit* <sup>#</sup> |            |
| General                                                                              | 230        |
| Surgical                                                                             | 52         |
| Medical                                                                              | 38         |
| Cardiac/Cardiology/Cardiothoracic                                                    | 35         |
| Neurological                                                                         | 22         |
| Respiratory                                                                          | 17         |
| Trauma                                                                               | 14         |
| Renal                                                                                | 5          |
| Burns                                                                                | 4          |
| Liver                                                                                | 4          |
| ENT                                                                                  | 3          |
| Other <sup>~</sup>                                                                   | 10         |

n=181 responses. \*n=2 non-responses. <sup>#</sup>Data presented indicates frequency of reported occurrence of type. Multiple responses could be given. <sup>~</sup>Other e.g. haematology, infectious disease, maxillo-facial, vascular.

Abbreviations: ICU = intensive care unit. HDU = high dependency unit. ENT = ear, nose, throat.

**Table 2.** Classifications of level of clinical care provided to patients

| Level | Classification                                                                                                                                                                                                              |
|-------|-----------------------------------------------------------------------------------------------------------------------------------------------------------------------------------------------------------------------------|
| 0     | Patients whose needs can be met through normal ward care in an acute hospital.                                                                                                                                              |
| 1     | Patients at risk of their condition deteriorating, or those recently located from higher levels of care, whose needs can be met on an acute ward with additional advice and support from the critical care team.            |
| 2     | Patients requiring more detailed observation or intervention including support for a single failing organ system or post-operative care and those 'stepping down' from higher levels of care.                               |
| 3     | Patients requiring advanced respiratory support alone or basic respiratory support together with support of at least two organ systems. This level includes all complex patients requiring support for multi-organ failure. |

From Comprehensive Critical Care, DH, 2000 [20]

### Post hospital discharge follow-up clinical services

Forty-eight organisations (27.3%, 95%CI (20.7 to 33.9)) indicated availability of follow-up of post critical illness patients at 2-3months following hospital discharge (*Figure E1, Data Supplement*). Thirty-two (66.7%) of these were from DG hospitals and 16 (33.3%) from university teaching (UT) hospitals. Forty-five organisations offering follow-up were located in England, two in Scotland, one in Northern Ireland and none in Wales. Two respondents did not provide details of follow-up provision. Of the remaining responses (n=46), ICU follow-up clinics were the most frequently reported form of follow-up (n=39, 84.8%) (*Table 3*). Eleven respondents indicated more than one form of follow-up was in place.

**Table 3.** Follow-up services for critical care survivors post hospital discharge

| <b>Form of follow-up</b>             | <b>n (%)</b> |
|--------------------------------------|--------------|
| ICU follow-up clinic                 | 39 (84.8)    |
| Rehabilitation class                 | 10 (21.7)    |
| Other                                | 6 (13.0)     |
| Did not specify                      | 2 (4.3)      |
| Postal survey                        | 1 (2.2)      |
| Telephone call                       | 1 (2.2)      |
| Medical outpatient appointment       | 0 (0)        |
| <b>Multidisciplinary team member</b> | <b>n (%)</b> |
| Physiotherapist                      | 43 (89.6)    |
| Critical Care nurse                  | 42 (87.5)    |
| Critical Care doctor                 | 31 (64.6)    |
| Psychologist                         | 10 (20.8)    |
| Dietician                            | 2 (4.2)      |
| Occupational therapist               | 2 (4.2)      |
| <b>Content of follow-up</b>          | <b>n (%)</b> |
| HRQL                                 | 40 (83.3)    |
| Psychological status                 | 39 (81.3)    |
| Medical status                       | 34 (70.8)    |
| Nursing-related issues               | 29 (60.4)    |
| Exercise capacity                    | 28 (58.3)    |
| Diet/nutrition                       | 24 (50.0)    |
| Other                                | 9 (18.8)     |

For follow-up, n=frequency of reported occurrence out of 46 responses. Multiple forms of follow-up could be indicated. Other included informal coffee morning, patient support group, physiotherapy outreach, ad hoc appointments with ICU nursing staff. For multidisciplinary team members, n=frequency of reported occurrence out of 48 responses. Multiple team members could be listed. For follow-up content, n=frequency of reported occurrence out of 48 responses. Multiple content could be listed. Other included 'problem-based' or 'patient-dependent' discussion

*Abbreviation: ICU = intensive care unit. HRQL = health-related quality of life.*

1  
2  
3 Forty-three (89.6%) respondents reported that physiotherapists were part of the  
4  
5 multidisciplinary team (MDT) involved in follow-up of post critical illness patients. However,  
6  
7 just under one-third of these, n= 13 (30.2%), indicated that this was on an *ad hoc* referral  
8  
9 basis only. Other MDT members involved in follow-up are detailed in *Table 3*. In five cases  
10  
11 access to critical care doctors, occupational therapists, psychologists or dieticians was also  
12  
13 reported to be on a referral basis only. Critical care nurses were the most consistently  
14  
15 featured MDT members and occupational therapists and dieticians were rarely involved in  
16  
17 follow-up. The scale of MDT involvement ranged from one member (10.4%) to five  
18  
19 members (2.0%), with three being the most common (43.8%). No other healthcare  
20  
21 professionals, other than those listed, were documented to be part of the MDT.  
22  
23  
24  
25  
26  
27  
28

29 Nearly half of those with follow-up services included a functional reassessment for  
30  
31 comparison with assessment conducted at the time of hospital discharge (n = 20, 42.6%).  
32  
33 *Table 3* details other aspects of follow-up assessments; health-related quality of life (n = 40,  
34  
35 83.3%) and psychological status (n= 39, 81.3%) were the most frequently reported items.  
36  
37  
38 Exercise capacity and nursing-related issues were included in approximately half of cases.  
39  
40  
41  
42

### 43 **Availability of post hospital discharge rehabilitation programmes**

44  
45 Twelve organisations reported a rehabilitation programme was available following hospital  
46  
47 discharge for post critical illness patients (6.8%, 95% CI (3.1 to 10.5)) (*Figure E1, Data*  
48  
49 *Supplement*). Two indicated that their programme was only available on an *ad hoc* basis  
50  
51 only. Of the remaining ten programmes implemented on a regular basis, 4 (40%) were  
52  
53 conducted at UT hospitals and 6 (60%) at DG hospitals), and all based at organisations in  
54  
55  
56  
57  
58  
59  
60

1  
2  
3 England. All had also reported offering a follow-up service, with eight of these in the form  
4  
5 of an ICU follow-up clinic.  
6  
7

8  
9  
10 Senior ICU physiotherapists led all available rehabilitation programmes, with the exception  
11  
12 of one led by a rehabilitation physiotherapist. The majority (n=9) were hospital-based,  
13  
14 outpatient programmes, specific for post critical illness patients. Exercise was a component  
15  
16 of all programmes including cardiovascular, muscle strength, balance and functional  
17  
18 activities. Exercise prescription was usually based on clinician judgement, and on occasion  
19  
20 using results of physical assessment of walking capacity of function. Clinical and  
21  
22 physiological parameters were used to monitor exercise intensity during sessions. Less than  
23  
24 half of all programmes (n=4) included education sessions. Measures used to evaluate  
25  
26 effectiveness of these rehabilitation programmes varied greatly with exercise capacity and  
27  
28 health-related quality of life most commonly reported.  
29  
30  
31  
32  
33

34  
35  
36 Further detail on the leadership, format and structure, content and monitoring and  
37  
38 evaluation of available post hospital discharge rehabilitation programmes can be found in  
39  
40 the Data Supplement (E2).  
41  
42  
43  
44

#### 45 **Barriers to delivery of post hospital discharge rehabilitation programmes**

46  
47 Respondents were requested to report the barriers to delivery of post hospital discharge  
48  
49 rehabilitation programmes from a non-hierarchical list including clinical, pragmatic,  
50  
51 managerial and administrative options. From the reasons selected, respondents were also  
52  
53 requested to confirm the main reason. From a potential 171 responses, there were seven  
54  
55 non-responses to both parts of this question (n=164), and a further 8 non-responses to  
56  
57  
58  
59  
60

specifying the main barrier (n=156). 91% (n = 149) of respondents reported lack of funding as one barrier to offering a post hospital discharge rehabilitation programme, and 75% reported lack of staff (Table 4). Only 2.4% of respondents reported that a lack of evidence and less than 1% of respondents reported time constraints as barriers to implementing a post hospital discharge rehabilitation programme. 6% (10/164) of respondents listed only one barrier, 20% (33/164) listed two barriers and 73% (120/164) listed greater than two barriers.

**Table 4.** Barriers to post hospital discharge rehabilitation programmes for survivors of critical illness

| Barrier                                                      | Frequency reported overall, n (%) | Frequency reported as main barrier, n (%) |
|--------------------------------------------------------------|-----------------------------------|-------------------------------------------|
| Lack of funding                                              | 149 (90.9)                        | 99 (63.5)                                 |
| Lack of sufficient staff                                     | 128 (78.0)                        | 17 (10.9)                                 |
| Resources prioritised to other patient groups/clinical areas | 71 (43.3)                         | 4 (2.7)                                   |
| Not considered required service at managerial level          | 66 (40.2)                         | 22 (14.1)                                 |
| Lack of available space                                      | 50 (30.5)                         | 2 (1.3)                                   |
| Insufficient patient numbers to justify                      | 35 (21.3)                         | 11 (7.1)                                  |
| Extra-contractual (out-of-area) patient caseload             | 15 (9.1)                          | 0 (0.0)                                   |
| Lack of trained staff                                        | 13 (7.9)                          | 0 (0.0)                                   |
| No evidence                                                  | 4 (2.4)                           | 0 (0.0)                                   |
| Not sure what to include in a programme                      | 2 (1.2)                           | 0 (0.0)                                   |
| Other (time constraints)                                     | 1 (0.6)                           | 1 (0.6)                                   |

For frequency of reported barriers overall, n=164 responses. For frequency of reporting as main barrier, n=156 responses. (n=182 responses, excluding one blank response, ten non-applicable responses relating to rehabilitation programmes in regular operation, seven non-responses to both parts of this question, and a further eight non-responses to specifying the main barrier).

### Alternative rehabilitation programmes

57.3% (98/171) of respondents reported that in the absence of a specific post hospital discharge rehabilitation programme for survivors of critical illness at their organisation, patients were referred into alternative rehabilitation streams, including pulmonary rehabilitation (PR) (62/98, 63.3%) and cardiac rehabilitation (38/98, 38.8%) (e.g. those patients post cardiac surgery and post myocardial infarction) and various community-based services (59/98; 60.2%). Free-text comments from respondents regarding barriers to offering rehabilitation programmes and the use of alternative rehabilitation streams for ICU survivors following hospital discharge can be found in the Data Supplement (E3).

### DISCUSSION

These data from the first comprehensive UK survey highlight the limited implementation of NICE CG83 and the poor delivery across the UK of post hospital rehabilitation services for survivors of critical illness. Indeed, of one-hundred and eighty-two surveys returned, less than one-third of all institutions surveyed provided any form of follow-up for these patients. Of major clinical concern is that only 5% of respondents reported the provision of a regular rehabilitation programme for critical illness survivors, a major focus of CG83. A lack of funding was the most frequently reported and main barrier to service availability. Furthermore, lack of managerial support for this type of service and prioritisation of resource allocation to other clinical areas were reported as barriers by over 40% of the respondents. These data indicate that inadequate clinical infrastructure exists for hospitals and community teams to successfully adhere to NICE CG83. The limited impact of NICE guidance on clinical practice is not unique to critical care rehabilitation and is, rather



1  
2  
3 disappointingly, a theme observed in other areas of healthcare that have been subject to  
4  
5 the development of NICE guidelines.  
6  
7  
8  
9

### 10 **Implementation NICE CG83 across the UK**

11  
12 The lack of implementation of NICE CG83 evident from these data could have reflected poor  
13  
14 motivation on the part of clinicians to actively engage in the delivery of recommendations.  
15  
16 However, the key barriers to service delivery were reported as lack of funding, limited  
17  
18 resources and infrastructure with reduced priority at managerial level. In the modern  
19  
20 National Health Service (NHS), such obstacles to the application of NICE CG83 are at either a  
21  
22 clinical commissioning or clinical operational level, or both, rather than at the level of the  
23  
24 clinicians. Interestingly, the paucity of data to support the effectiveness of post ICU  
25  
26 rehabilitation was not perceived as a barrier by the vast majority of clinicians, and highlights  
27  
28 the complexities in the management and clinical delivery of a critical care rehabilitation  
29  
30 service. A conflict between clinicians, managers and commissioners has developed as the  
31  
32 lack of high level clinical evidence supporting NICE CG83 provides a major challenge to the  
33  
34 funding of a critical care survivor rehabilitation service by both managers and  
35  
36 commissioners.  
37  
38  
39  
40  
41  
42  
43  
44  
45

### 46 **Alternatives to post hospital discharge rehabilitation programmes**

47  
48 Rehabilitation for survivors of critical illness is a complex intervention [21], that requires  
49  
50 further translational work and clinical trials to provide the evidence [22-24]. Until these  
51  
52 data are available, the unmet clinical need will remain evident and unaddressed. Referral  
53  
54 into established rehabilitation programmes, such as cardiac and pulmonary rehabilitation,  
55  
56 offers one potential resolution with over 50% of respondents reported the use of other  
57  
58  
59  
60

1  
2  
3 rehabilitation programmes for the critical care survivors, and this may further be influenced  
4  
5 by the designated speciality of the ward destination of patients following ICU discharge.  
6  
7 Indeed the up-to-date guidelines for pulmonary rehabilitation [25], advocate individualised  
8  
9 patient management and these interventions could be easily adapted for patients  
10  
11 recovering from critical, albeit that additional referrals places an increased burden these  
12  
13 services. However, whilst valuable resources, these programmes are disease-specific and  
14  
15 may not fully address the range of impairments demonstrated by survivors of critical illness  
16  
17 as part of 'post intensive care syndrome' [5].  
18  
19  
20  
21  
22  
23

#### 24 **The clinical usefulness of post ICU clinics**

25  
26 Post-ICU clinics provided the majority of available follow-up services in the current survey.  
27  
28 Profiled in the late 1990s and early 2000s following updating of the NHS agenda for critical  
29  
30 care [20 26], these clinics have been reported by patients to play a valuable contribution to  
31  
32 their physical, emotional and psychological recovery [27]. However, trial data have failed to  
33  
34 demonstrate clinical effectiveness or cost benefit [28]. An alternative approach to the  
35  
36 conduct and purpose of post ICU clinics would be to robustly monitor over time the  
37  
38 trajectory of recovery of ICU survivors with onward referral into specific speciality care  
39  
40 where identified as required. Wide variability in responses regarding post hospital discharge  
41  
42 rehabilitation programmes for ICU survivors severely limits any consensus on the optimum  
43  
44 approach for these services. The marked heterogeneity of the patient population makes it  
45  
46 increasingly likely that a bespoke, individualised approach, akin to the approach of  
47  
48 personalised medicine, may be more appropriate.  
49  
50  
51  
52  
53  
54  
55  
56

#### 57 **Barriers to implementation of national guidelines**

1  
2  
3 The implementation of, and adherence to, a clinical guideline can be inconsistent [29 30].  
4  
5 The limited detail in terms of the rehabilitation programme in the guideline *per se* as well as  
6  
7 local conditions such as staff infrastructure, organisation and resource were the main source  
8  
9 of restriction to implementation of NICE CG83 in the current survey [31]. This is the first  
10  
11 survey to investigate reasons behind failure to implement such a national guideline and  
12  
13 offer significant insight into the requirements necessary for successful clinical application of  
14  
15 recommendations designed to enhance patient care. Whilst the goals of NICE CG83 were  
16  
17 important and raised the profile of this area of clinical practice the influence will be short-  
18  
19 lived without further investment in support systems at operational and staffing level.  
20  
21 Disappointingly, this scenario appears to be mirrored in other common clinical conditions.  
22  
23 Although evidence supports the use of early pulmonary rehabilitation (PR) following acute  
24  
25 exacerbation of chronic obstructive pulmonary disease (AECOPD) to enhance exercise  
26  
27 capacity, health status and reduce hospital readmissions [25 32-34], recent data suggest  
28  
29 that only one-third of eligible patients are referred to early PR programmes and less than  
30  
31 10% of all hospital discharges for AECOPD complete early post-hospitalisation PR [12]. This  
32  
33 implementation failure is also observed following the NICE guidance on the management of  
34  
35 obstructive sleep apnoea [35] with a recent national mapping exercise highlighting a  
36  
37 significant mismatch between predictive healthcare requirements, based on prevalence of  
38  
39 known associated risk factors, and delivery of related services [13]. Furthermore, the 2012  
40  
41 NHS Atlas of Variation in Healthcare for People with Diabetes [11] revealed substantial  
42  
43 numbers of patients were not in receipt of the basic clinical standards of care. The barriers  
44  
45 to the implementation of these guidelines are specific to each clinical area, but there are  
46  
47 generic barriers, such as lack of adequate funding and resource, that need to be considered  
48  
49 carefully. However, it must be highlighted that robust clinical trial and other data are  
50  
51  
52  
53  
54  
55  
56  
57  
58  
59  
60

1  
2  
3 required to support a guideline if it is to be commissioned within the NHS and delivering a  
4  
5 guideline prematurely will lead to implementation failure, despite major enthusiasm by  
6  
7 clinicians.  
8  
9

### 10 11 12 **Critique of the method** 13

14  
15 A major strength of this survey is the employment of a variety of strategies to optimise  
16  
17 completion, resulting in a 76% response rate. Nonetheless, survey non-response is a  
18  
19 challenge to the robustness of the current findings, introducing bias through the potential  
20  
21 for non-responders to differ significantly from responders [36 37]. Despite this, one must  
22  
23 consider this as a most satisfactory return indicating external validity [37 38]. The high  
24  
25 response rate may represent the clinical concern of the respondents in terms of poor  
26  
27 implementation of NICE CG83, in particular, as the core standards for care of the critically ill  
28  
29 patient have been recently published highlighting rehabilitation as an important core clinical  
30  
31 care standard [39].  
32  
33  
34  
35  
36  
37

38  
39 Postal questionnaires can be preferable for conducting surveys of large populations over a  
40  
41 wide geographical range, offering a cost-efficient as well as time-efficient format with often  
42  
43 improved response rates in comparison to alternative routes such as telephone interview or  
44  
45 email [40]. Furthermore, an email or internet-based platform would have been restricted in  
46  
47 the current study due to lack of available electronic contact details for clinicians, and where  
48  
49 postal distribution offered a more standardised approach for monitoring and identifying  
50  
51 respondents. Nonetheless, we acknowledge that in the current technology climate, many  
52  
53 respondents may have preferred this option for survey participation. We utilised both email  
54  
55 and telephone contact at later stages of survey distribution as a more feasible and less cost-  
56  
57  
58  
59  
60

1  
2  
3 prohibitive means to target previous non-responders with good effect. Despite  
4  
5 encountering some difficulty with locating designated senior clinicians [41], this resulted in a  
6  
7 relatively high conversion rate of 36% of non-responders. The current survey took  
8  
9 advantage of a range of design and formatting strategies to enhance completion,  
10  
11 additionally including a personalised cover letter and stamped addressed envelopes [37 38  
12  
13 42]. Survey review was undertaken during piloting with three senior clinical-academics, and  
14  
15 we aimed to minimise additional burden to potential respondents by not utilising a larger  
16  
17 sample at this stage. Furthermore, we adopted an approach to survey distribution in  
18  
19 keeping with that suggested to minimise non-response [43]. However, the current survey  
20  
21 lacked sufficient demographic or other data regarding non-responders to attempt  
22  
23 comparison between the two groups [36 37], although 95% confidence intervals are narrow  
24  
25 supporting the respondents as representative sample of the whole respondent population.  
26  
27  
28  
29  
30  
31  
32

33  
34 We identified ICUs for inclusion based on data provided by two national registries (ICNARC  
35  
36 and SICSAG). Whilst specialist-only and private institutions were excluded, assuming that  
37  
38 rehabilitation services offered to these patient cohorts may be influenced by disease-  
39  
40 specific or institutional status-related factors, we acknowledge that future survey data  
41  
42 acquired from these organisations may add further benefit to characterising service  
43  
44 provision. We adopted a more rigorous approach to data acquisition than previous similar  
45  
46 surveys that were country-specific [18] or excluded key regions [19], albeit these authors  
47  
48 examined NICE CG83 implementation across the patient pathway and results observed at  
49  
50 the post hospital discharge stage mirrored those of the current study.  
51  
52  
53  
54  
55  
56  
57  
58  
59  
60

1  
2  
3 The current study focussed on post hospital discharge management as it is at this stage that  
4  
5 patients may be more likely to experience insufficient input for reasons such as lack of  
6  
7 available services, repatriation back to other geographical regions or follow-up under non-  
8  
9 ICU teams [44]. In contrast to previous surveys, we examined barriers to service availability  
10  
11 in detail to gain further insight regarding this. Furthermore, rehabilitation for ICU survivors  
12  
13 following hospital discharge has been the focus of recent research interest with randomised  
14  
15 controlled trial data now available [45]. The current survey could be critiqued for being  
16  
17 discipline-specific. However, it was considered that senior critical care physiotherapy  
18  
19 clinicians would be well-informed as key members of the multi-disciplinary team involved in  
20  
21 management of ICU survivors, to comment on follow-up and rehabilitation service provision  
22  
23 at their institutions.  
24  
25  
26  
27  
28  
29  
30

## 31 **CONCLUSION**

32  
33 These data from this first comprehensive UK survey of post hospital discharge rehabilitation  
34  
35 programmes for critical illness survivors have demonstrated a low reported prevalence and,  
36  
37 more importantly, this survey has showed a failure to implement NICE CG83. Lack of clinical  
38  
39 prioritisation and funding was reported by the clinicians as the major cause for the failure to  
40  
41 implement the guideline, but the paucity of evidence that supported the guideline must be  
42  
43 regarded as a major contributor to the limited engagement between clinicians, managers  
44  
45 and commissioners to deliver NICE CG83. Without clinical and cost effectiveness evidence  
46  
47 for such a programme, it would be a significant challenge to commission such a service in an  
48  
49 NHS that is driven to commission both clinical and specialist services with an established  
50  
51 evidence base. The focus of the clinicians must be to ensure that clinical guidelines have a  
52  
53  
54  
55  
56  
57  
58  
59  
60

1  
2  
3 robust and strong evidence base to maximise their implementation and this will result in an  
4  
5 enhancement in patient care that will be both clinical and cost effective.  
6  
7

### 8 9 10 **ACKNOWLEDGEMENTS**

11  
12 We thank the Intensive Care National Audit and Research Centre, and the Scottish Intensive  
13  
14 Care Society Audit Group for assistance with database information for identification of  
15  
16 organisations for participation. Furthermore we thank the various clinical and research  
17  
18 network colleagues who assisted with promotion of the survey.  
19  
20  
21  
22

### 23 24 **CONTRIBUTORS**

25  
26 BC, LD and NH contributed to the conception and design of the study. BC and AD analysed  
27  
28 the data. BC and NH interpreted the data. BC drafted the manuscript and all authors  
29  
30 critically revised for significant intellectual content and insight. All authors had full access to  
31  
32 all of the data and can take responsibility for the integrity and accuracy of data analysis.  
33  
34 Furthermore all authors gave final approval of the manuscript version for publication. BC  
35  
36 and NH are responsible for the overall content as guarantors.  
37  
38  
39  
40  
41  
42

### 43 44 **FUNDING**

45  
46 This research was supported by the National Institute for Health Research (NIHR) Biomedical  
47  
48 Research Centre at Guy's and St Thomas' NHS Foundation Trust and King's College London.  
49  
50 The views expressed are those of the author(s) and not necessarily those of the NHS, the  
51  
52 NIHR or the Department of Health.  
53  
54  
55

### 56 57 **COMPETING INTERESTS**

1  
2  
3 All authors have completed the Unified Competing Interest Form at  
4  
5 [www.icmje.org/coi\\_disclosure.pdf](http://www.icmje.org/coi_disclosure.pdf) (available from the corresponding author) and declare:  
6  
7 no support from any organisation for the submitted work; no financial relationships with  
8  
9 any organisations that might have an interest in the submitted work in the previous three  
10  
11 years; no spouse, partner or children have any financial relationships that may be relevant  
12  
13 to the submitted work; and no other non-financial interests that may be relevant to the  
14  
15 submitted work.  
16  
17  
18  
19  
20

#### 21 **ETHICAL APPROVAL**

22 Ethical approval was not required for this study.  
23  
24  
25  
26  
27

#### 28 **DATA SHARING**

29 No additional data available.  
30  
31  
32  
33  
34  
35

#### 36 **COPYRIGHT FOR PUBLICATION**

37  
38 The Corresponding Author has the right to grant on behalf of all authors and does grant on  
39  
40 behalf of all authors, a worldwide licence to the Publishers and its licensees in perpetuity, in  
41  
42 all forms, formats and media (whether known now or created in the future), to i) publish,  
43  
44 reproduce, distribute, display and store the Contribution, ii) translate the Contribution into  
45  
46 other languages, create adaptations, reprints, include within collections and create  
47  
48 summaries, extracts and/or, abstracts of the Contribution, iii) create any other derivative  
49  
50 work(s) based on the Contribution, iv) to exploit all subsidiary rights in the Contribution, v)  
51  
52 the inclusion of electronic links from the Contribution to third party material where-ever it  
53  
54 may be located; and, vi) licence any third party to do any or all of the above.  
55  
56  
57  
58  
59  
60



**What is already known on this topic**

Survivors of critical illness demonstrate impairment of physical function, psychological well-being, cognitive function and health-related quality of life that are recognised clinical features of the post intensive care syndrome.

In the UK, rehabilitation following critical illness as a continuum that spans the whole patient pathway of recovery has been recommended in national guidance.

**What this study adds**

Limited implementation of NICE CG83 is evident across the UK in terms of clinical follow-up and rehabilitation programmes.

Establishing robust evidence to support national guidelines will maximise implementation to ensure clinical and cost-effective patient care is delivered.

## References

1. Cheung AM, Tansey CM, Tomlinson G, et al. Two-Year Outcomes, Health Care Use, and Costs of Survivors of Acute Respiratory Distress Syndrome. *Am J Resp Crit Care Med* 2006;**174**(5):538-44 doi: 10.1164/rccm.200505-693OC[published Online First: Epub Date]].
2. Herridge MS, Tansey CM, Matté A, et al. Functional Disability 5 Years after Acute Respiratory Distress Syndrome. *N. Engl. J. Med.* 2011;**364**(14):1293-304 doi: doi:10.1056/NEJMoa1011802[published Online First: Epub Date]].
3. Hopkins RO, Weaver LK, Collingridge D, Parkinson RB, Chan KJ, Orme JF, Jr. Two-Year Cognitive, Emotional, and Quality-of-Life Outcomes in Acute Respiratory Distress Syndrome. *Am. J. Respir. Crit. Care Med.* 2005;**171**(4):340-47 doi: 10.1164/rccm.200406-763OC[published Online First: Epub Date]].
4. Needham DM, Dinglas VD, Morris PE, et al. Physical and Cognitive Performance of Patients with Acute Lung Injury 1 Year after Initial Trophic versus Full Enteral Feeding. EDEN Trial Follow-up. *Am. J. Respir. Crit. Care Med.* 2013;**188**(5):567-76 doi: 10.1164/rccm.201304-0651OC[published Online First: Epub Date]].
5. Needham DM, Davidson J, Cohen H, et al. Improving long-term outcomes after discharge from intensive care unit: Report from a stakeholders' conference. *Crit. Care Med.* 2012;**40**(2):502-09
6. Iwashyna TJ. Survivorship will be the defining challenge of critical care in the 21st century. *Ann. Intern. Med.* 2010;**153**(3):204-5 doi: 153/3/204 [pii] 10.1059/0003-4819-153-3-201008030-00013[published Online First: Epub Date]].
7. Camporota L, Hart N. Lung protective ventilation. *BMJ* 2012;**344** doi: 10.1136/bmj.e2491[published Online First: Epub Date]].

- 1  
2  
3 8. NICE. *Rehabilitation after critical illness. NICE Clinical Guideline 83*: National Institute for  
4  
5 Health and Clinical Excellence, London, UK, 2009.  
6
- 7  
8 9. Connolly B, Denehy L, Brett S, Elliott D, Hart N. Exercise rehabilitation following hospital  
9  
10 discharge in survivors of critical illness: an integrative review. *Critical Care*  
11  
12 2012;**16**(3):226  
13
- 14  
15 10. Griffiths J, Hatch R, Bishop J, et al. An exploration of social and economic outcome and  
16  
17 associated health-related quality of life after critical illness in general intensive care  
18  
19 unit survivors: a 12-month follow-up study. *Critical Care* 2013;**17**(3):R100  
20
- 21  
22 11. NHS Right Care Atlas of Variation. Accessed 13/11/13.; **Available at**  
23  
24 **<http://www.rightcare.nhs.uk/index.php/nhs-atlas/>**  
25
- 26  
27 12. Jones S, Green S, Clark A, et al. Pulmonary rehabilitation following hospitalisation for  
28  
29 acute exacerbation of COPD: referrals, uptake and adherence. *Thorax* 2013;doi:  
30  
31 **10.1136/thoraxjnl-2013-204227**  
32
- 33  
34 13. Steier J, Martin A, Harris J, Jarrold I, Pugh D, Williams A. Predicted relative prevalence  
35  
36 estimates for obstructive sleep apnoea and the associated healthcare provision  
37  
38 across the UK. *Thorax* 2013 doi: 10.1136/thoraxjnl-2013-203887[published Online  
39  
40 First: Epub Date]].  
41
- 42  
43 14. Griffiths JA, Barber VS, Cuthbertson BH, Young JD. A national survey of intensive care  
44  
45 follow-up clinics. *Anaesthesia* 2006;**61**(10):950-55 doi: 10.1111/j.1365-  
46  
47 2044.2006.04792.x[published Online First: Epub Date]].  
48
- 49  
50 15. Hodgkin KE, Nordon-Craft A, McFann KK, Mealer ML, Moss M. Physical therapy utilization  
51  
52 in intensive care units: Results from a national survey. *Crit. Care Med.*  
53  
54 2009;**37**(2):561-68  
55  
56  
57  
58  
59  
60

- 1  
2  
3 16. Lewis M. Intensive Care Unit Rehabilitation within the United Kingdom: Review.  
4  
5       Physiotherapy 2003;**89**(9):531-38  
6  
7  
8 17. Skinner EH, Berney S, Warrillow S, Denehy L. Rehabilitation and exercise prescription in  
9  
10       Australian intensive care units. Physiotherapy 2008;**94**(3):220-29  
11  
12 18. Appleton R, MacKinnon M, Booth M, Wells J, Quasim T. Rehabilitation within Scottish  
13  
14       intensive care units: a national survey. Journal of the Intensive Care Society  
15  
16       2011;**12**(3):221-27  
17  
18 19. Berry A, Cutler L, Himsworth A. National survey of rehabilitation after critical illness.  
19  
20       Journal of the Intensive Care Society 2013;**14**(4):334-39  
21  
22 20. Department of Health. *Critical Care Outreach 2003: Progress in Developing Services*.  
23  
24       Department of Health and Modernisation Agency. 2003  
25  
26  
27 21. Medical Research Council: Developing and evaluating complex interventions: new  
28  
29       guidance. Available at  
30  
31       <http://www.mrc.ac.uk/Utilities/Documentrecord/index.htm?d=MRC004871>; **Accessed**  
32  
33       **14th May 2013**  
34  
35  
36 22. Herridge M. The challenge of designing a post-critical illness rehabilitation intervention.  
37  
38       Critical Care 2011;**15**(5):1002  
39  
40  
41 23. Connolly B, Jones G, Curtis A, et al. Clinical predictive value of manual muscle strength  
42  
43       testing during critical illness: an observational cohort study. Critical Care  
44  
45       2013;**17**(5):R229  
46  
47  
48 24. Puthuchery ZA, Rawal J, McPhail M, et al. Acute skeletal muscle wasting in critical  
49  
50       illness. JAMA 2013;**310**(15):1591-600 doi: 10.1001/jama.2013.278481[published  
51  
52       Online First: Epub Date]].  
53  
54  
55  
56  
57  
58  
59  
60

- 1  
2  
3 25. Spruit MA, Singh SJ, Garvey C, et al. An Official American Thoracic Society/European  
4  
5 Respiratory Society Statement: Key Concepts and Advances in Pulmonary  
6  
7 Rehabilitation. *Am. J. Respir. Crit. Care Med.* 2013;**188**(8):e13-e64 doi:  
8  
9 10.1164/rccm.201309-1634ST[published Online First: Epub Date]].  
10  
11  
12 26. Department of Health. *Comprehensive Critical Care: A Review of Adult Critical Care*  
13  
14 *Services.* London. 2000.  
15  
16  
17 27. Prinjha S, Field K, Rowan K. What patients think about ICU follow-up services: a  
18  
19 qualitative study. *Critical Care* 2009;**13**:R46  
20  
21  
22 28. Cuthbertson BH, Rattray J, Campbell MK, et al. The PRaCTICaL study of nurse led,  
23  
24 intensive care follow-up programmes for improving long term outcomes from critical  
25  
26 illness: a pragmatic randomised controlled trial. *BMJ* 2009;**339**:b3723 doi:  
27  
28 10.1136/bmj.b3723[published Online First: Epub Date]].  
29  
30  
31 29. Grimshaw J, Russell I. Effect of clinical guidelines on medical practice: a systematic  
32  
33 review of rigorous evaluations. *The Lancet* 1993;**342**:1317-22  
34  
35  
36 30. McKinlay J, Link C, Feund K, Marceau L, O'Donnell A, Lutfey K. Sources of Variation in  
37  
38 Physician Adherence with Clinical Guidelines: Results from a Factorial Experiment. *J.*  
39  
40 *Gen. Intern. Med.* 2007;**22**(3):289-06  
41  
42  
43 31. Cabana MD, Rand CS, Powe NR, et al. Why don't physicians follow clinical practice  
44  
45 guidelines? A framework for improvement. *JAMA* 1999;**282**(15):1458-65 doi:  
46  
47 10.1001/jama.282.15.1458[published Online First: Epub Date]].  
48  
49  
50 32. Man WD-C, Polkey MI, Donaldson N, Gray BJ, Moxham J. Community pulmonary  
51  
52 rehabilitation after hospitalisation for acute exacerbations of chronic obstructive  
53  
54 pulmonary disease: randomised controlled study. *BMJ* 2004;**329**(7476):1209- doi:  
55  
56 10.1136/bmj.38258.662720.3A[published Online First: Epub Date]].  
57  
58  
59  
60

- 1  
2  
3 33. NICE. *Chronic Obstructive Pulmonary Disease: Management of Chronic Obstructive*  
4  
5 *Pulmonary Disease in Adults in Primary and Secondary Care. NICE Clinical Guideline*  
6  
7 *CG101*: National Institute of Clinical Excellence, London, UK, 2010.  
8  
9
- 10 34. Seymour JM, Moore L, Jolley CJ, et al. Outpatient pulmonary rehabilitation following  
11  
12 acute exacerbations of COPD. *Thorax* 2010;**65**(5):423-28 doi:  
13 10.1136/thx.2009.124164[published Online First: Epub Date]|.  
14  
15  
16
- 17 35. TA139 Continuous positive airway pressure for the treatment of obstructive sleep  
18  
19 apnoea/hypopnoea syndrome. National Institute of Health and Clinical Excellence.  
20  
21 Accessed 13/11/13.;**Available at [www.nice.org.uk/TA139](http://www.nice.org.uk/TA139)**  
22  
23
- 24 36. Burkell J. The dilemma of survey nonresponse. *Library & Information Science Research*  
25  
26 2003;**25**:239-63  
27  
28
- 29 37. Rubenfeld GD. Surveys: An Introduction. *Respir. Care* 2004;**49**(10):1181-85  
30  
31
- 32 38. Portney L, Watkins M. *Foundations of Clinical Research: Applications to Practice*. Third  
33  
34 Edition ed: Pearson Education Inc, NJ, USA, 2009.  
35
- 36 39. Intensive Care Society Core Standards for Intensive Care Units. Intensive Care Society.  
37  
38 Accessed 13/11/13.;**Available at [http://www.ics.ac.uk/ics-homepage/guidelines-](http://www.ics.ac.uk/ics-homepage/guidelines-standards/)**  
39 **standards/**  
40  
41  
42
- 43 40. Stenhammer C, Bokstrom P, Edlund B, Sarkadi A. Using different approaches to  
44  
45 conducting postal questionnaires affected response rates and cost-efficiency. *J. Clin.*  
46  
47 *Epidemiol.* 2011;**64**:1137-43  
48  
49
- 50 41. Hocking J, Lim M, Read T, Hellard M. Postal surveys of physicians gave superior response  
51  
52 rates over telephone interviews in a randomized trial. *J. Clin. Epidemiol.*  
53  
54 2006;**59**:521-24  
55  
56  
57  
58  
59  
60

- 1  
2  
3 42. Burns K, Duffett M, Kho M, et al. A guide for the design and conduct of self-administered  
4  
5 surveys of clinicians. *Can. Med. Assoc. J.* 2008;**179**(3):245-52  
6  
7  
8 43. Dillman D. *Mail and internet surveys: the tailored design method.*: Hoboken, NJ: John  
9  
10 Wiley & Sons 2007.  
11  
12 44. Connolly B, Thompson A, Moxham J, Hart N. Difficulties of Patient Recruitment to a Post  
13  
14 Critical Illness Rehabilitation Programme. *Am. J. Respir. Crit. Care Med.*  
15  
16 2012;**185**:A3886  
17  
18  
19 45. Denehy L, Skinner E, Edbrooke L, et al. Exercise rehabilitation for patients with critical  
20  
21 illness: a randomized controlled trial with 12 months of follow-up. *Critical Care*  
22  
23 2013;**17**(4):R156  
24  
25  
26  
27  
28  
29  
30  
31  
32  
33  
34  
35  
36  
37  
38  
39  
40  
41  
42  
43  
44  
45  
46  
47  
48  
49  
50  
51  
52  
53  
54  
55  
56  
57  
58  
59  
60

**FIGURE LEGENDS**

**Figure 1.** Flow-chart of survey distribution stages, response rates and promotional activities

*Abbreviations: iCSP = interactive Chartered Society of Physiotherapy. ACPRC = Association of Chartered Physiotherapists in Respiratory Care.*

For peer review only



1  
2  
3  
4  
5  
6  
7  
8  
9  
10  
11  
12  
13  
14  
15  
16  
17  
18  
19  
20  
21  
22  
23  
24  
25  
26  
27  
28  
29  
30  
31  
32  
33  
34  
35  
36  
37  
38  
39  
40  
41  
42  
43  
44  
45  
46  
47  
48  
49  
50  
51  
52  
53  
54  
55  
56  
57  
58  
59  
60

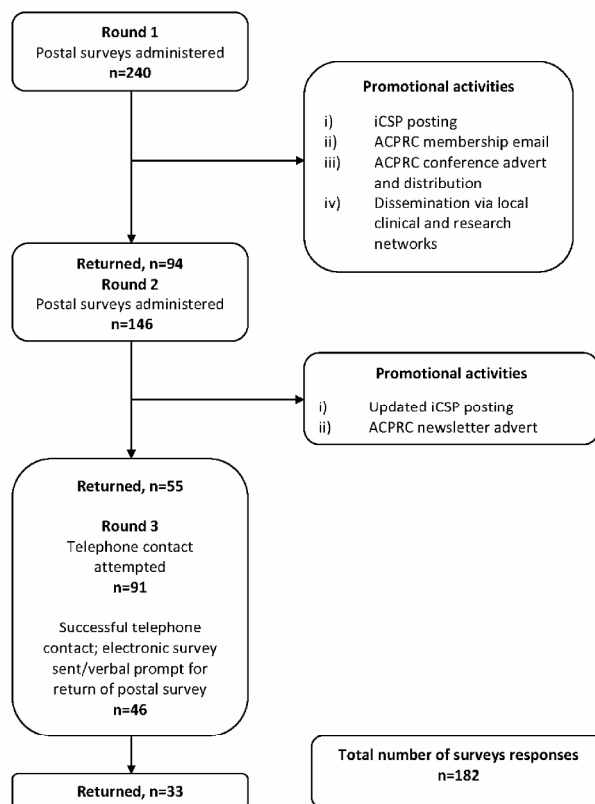

**Figure 1.** Flow-chart of survey distribution stages, response rates and promotional activities

Abbreviations: iCSP = interactive Chartered Society of Physiotherapy. ACPRC = Association of Chartered Physiotherapists in Respiratory Care.

Figure 1. Flow-chart of survey distribution stages, response rates and promotional activities  
Abbreviations: iCSP = interactive Chartered Society of Physiotherapy. ACPRC = Association of Chartered Physiotherapists in Respiratory Care.

208x278mm (300 x 300 DPI)

1  
2  
3 **Rehabilitation Following Critical Illness: The Failure to Implement NICE Clinical Guidance**  
4  
5 **83 (CG83) in the UK**  
6  
7  
8  
9

10 **DATA SUPPLEMENT**  
11

12  
13  
14  
15 **E1. Post hospital discharge follow-up services and rehabilitation programmes**  
16

17  
18  
19 Figure E1 reports available follow-up services and rehabilitation programmes for survivors of  
20 critical illness post hospital discharge.  
21  
22  
23

24  
25  
26  
27 **E2. Detail on characteristics of available post hospital discharge rehabilitation**  
28 **programmes for survivors of critical illness**  
29  
30  
31

32  
33  
34 *Leadership of, and enrolment into, post hospital discharge rehabilitation programmes*  
35

36  
37 In the majority of cases (n=9) this was a senior ICU physiotherapist (median (IQR) duration  
38 ICU experience 7.0 (4.0-13.0) years). A rehabilitation physiotherapist led one programme.  
39  
40 One programme reported additional involvement of an occupational therapist and a fitness  
41 instructor with three including critical care nurses. There were no other MDT members  
42 reported. Limited data were provided regarding enrolment criteria of patients into available  
43 rehabilitation programmes (Table E1).  
44  
45  
46  
47  
48  
49  
50  
51  
52  
53  
54  
55  
56  
57  
58  
59  
60

**Table E1.** Enrolment criteria for post hospital discharge rehabilitation programmes

| Eligibility criteria                    | n (%)    | Detail of assessment measure                                                                                                                                                                                                                                                                                                |
|-----------------------------------------|----------|-----------------------------------------------------------------------------------------------------------------------------------------------------------------------------------------------------------------------------------------------------------------------------------------------------------------------------|
| Duration mechanical ventilation         | 7 (70.0) | >5 days; >4 days; >3 days; 48hours                                                                                                                                                                                                                                                                                          |
| Duration ICU Admission                  | 3 (30.0) | >5 days; >4 days                                                                                                                                                                                                                                                                                                            |
| Duration hospital admission             | 2 (20.0) | "lengthened"                                                                                                                                                                                                                                                                                                                |
| Physical function at ICU discharge      | 2 (20.0) | "reduced from pre-admission"                                                                                                                                                                                                                                                                                                |
| Muscle strength at ICU discharge        | 2 (20.0) | No detail provided                                                                                                                                                                                                                                                                                                          |
| Exercise capacity at ICU discharge      | 2 (20.0) | No detail provided                                                                                                                                                                                                                                                                                                          |
| HRQL at ICU discharge                   | 0        | -                                                                                                                                                                                                                                                                                                                           |
| Physical function at hospital discharge | 4 (40.0) | No detail provided                                                                                                                                                                                                                                                                                                          |
| Muscle strength at hospital discharge   | 3 (30.0) | No detail provided                                                                                                                                                                                                                                                                                                          |
| Exercise capacity at hospital discharge | 3 (30.0) | No detail provided                                                                                                                                                                                                                                                                                                          |
| HRQL at hospital discharge              | 1 (10.0) | No detail provided                                                                                                                                                                                                                                                                                                          |
| All patients eligible                   | 1 (10.0) | "any ITU stay"                                                                                                                                                                                                                                                                                                              |
| Other                                   | 2 (20.0) | "those with profound weakness or functional limitation regardless of LOS";<br><br>"screen for low or high risk throughout ICU/hospital stay. If high risk, exercise plan, goals and rehab class if suitable. All plus 2 day ICU are automatically sent SF8 and depending on score, either 1:1 follow up or group follow-up" |

n=10 responses. Multiple criteria could be reported per response.

Abbreviations: ICU/ITU = intensive care/therapy unit. HRQL = health-related quality of life. LOS = length of stay. SF8 = Short Form-8 (health-related quality of life survey).

### *Format and structure of post hospital discharge rehabilitation programmes*

Of the ten rehabilitation programmes, nine were hospital-based and one was home-based. Patients exercised under supervision in four programmes, and with a combination of supervised and independent exercise in the remaining six. Only one programme used an accompanying rehabilitation manual, however three others reported providing printed, individualised home exercises for patients. All programmes were designed specifically for post critical illness patients. None were combined with existing disease-specific services such as pulmonary or cardiac rehabilitation. Programmes started immediately (n=4), at one week (n=1), within two weeks (n=3), within one month (n=1) and at 2-3 months (n=1) post hospital discharge. The number of sessions in each programme varied from 6 to 12, excluding assessment sessions. Data were absent for two programmes. Three programmes had the capacity and flexibility to allow patients to continue until individual goals or target physical function level had been achieved. Typically sessions ran weekly (n=7) or twice-weekly (n=3). All programmes included sessions of one hour duration. Eight programmes were 'rolling' programmes and patients could start and finish the programme at any point in time. One was stand-alone such that cohorts of post critical illness patients all started and completed programmes together. No enrolment, initiation timing, frequency or duration data were reported for one programme.

### *Content and monitoring of post hospital discharge rehabilitation programmes*

All rehabilitation programmes included an exercise component, involving a combination of cardiovascular, muscle strength, whole body balance and functional activity (*Table E2*). Nine programmes incorporated at least two different forms of exercise prescription during the programme usually based on clinician judgement, sometime informed by results of walking

1  
2  
3 tests and physical function assessment. All programmes included at least two forms of  
4  
5 patient monitoring during exercise sessions, based on a range of physiological and clinical  
6  
7 factors. Seven programmes used target rates of perceived exertion with four programmes  
8  
9 using oxygen saturation levels and 3 programmes monitoring heart rate. In contrast,  
10  
11 patient-related parameters were adopted in 8 programmes which monitored exercise  
12  
13 performance based on verbal feedback of the patient, 6 based on clinician judgement of the  
14  
15 patient and 2 based on visual analogue scales undertaken by the patient.  
16  
17  
18  
19

20  
21 Surprisingly, less than half of all programmes included an education component (n=4). A  
22  
23 range of topics were covered including exercise, stress management and relaxation,  
24  
25 nutrition, return to work, energy conservation, medications, recovery following critical  
26  
27 illness, smoking cessation, managing breathlessness and breathing control, delivered  
28  
29 predominantly by physiotherapists but with additional input from occupational therapist  
30  
31 and nursing colleagues.  
32  
33  
34  
35

### 36 37 38 *Group size*

39  
40 Group size and staff-to-patient ratio was also highly variable between the 10 post  
41  
42 rehabilitation programmes. One programme incorporated a 1:1 staff-to-patient ratio whilst  
43  
44 another adopted a flexible approach that depended on the complexity of the patient and  
45  
46 individual rehabilitation needs. Across the remaining programmes group sizes ranged from  
47  
48 5 to 14 patients with one qualified staff member for every 3 patients. Seven of the ten  
49  
50 programmes adopted patient-specific exercise plans, whilst the remaining three reported  
51  
52 that patients exercised in a pre-determined circuit.  
53  
54  
55  
56  
57  
58  
59  
60

**Table E2.** Exercise component and evaluation of post hospital discharge rehabilitation programmes

| Category of exercise | Specific exercise                                                   | n (%)      |
|----------------------|---------------------------------------------------------------------|------------|
| Cardiovascular       | Static bike                                                         | 10 (100.0) |
|                      | Step-ups                                                            | 9 (90.0)   |
|                      | Treadmill                                                           | 7 (70.0)   |
|                      | Cross-trainer                                                       | 2 (20.0)   |
| Strength             | Lower limb                                                          | 10 (100.0) |
|                      | Upper limb                                                          | 10 (100.0) |
|                      | Theraband/resistance                                                | 9 (90.0)   |
|                      | Free weights                                                        | 7 (70.0)   |
| Balance              | Dynamic                                                             | 9 (90.0)   |
|                      | Static                                                              | 5 (50.0)   |
| Functional           | Sit-to-stand                                                        | 8 (80.0)   |
|                      | Walking                                                             | 6 (60.0)   |
|                      | Timed Up And Go                                                     | 2 (20.0)   |
| Outcome              | Detail of outcome measure                                           | n (%)      |
| HRQL                 | SF-36, HADS, EQ5D, FIM, SF-8                                        | 10 (100.0) |
| Exercise capacity    | 6MWT; ISWT                                                          | 9 (90.0)   |
| Other                | Achievement of patient-specific goals; BMI; Impacts of Events Score | 3 (30.0)   |
| Functional           | TUAG; patient-specific goals                                        | 2 (20.0)   |
| Strength             | 2 minute step-ups                                                   | 1 (10.0)   |
| Mental/cognitive     | -                                                                   | 0          |

For exercise component and outcome measures, n=frequency of reported occurrence out of 10 responses. Multiple options could be listed per response.

*Abbreviations: HRQL = health-related quality of life. 6MWT = Six Minute Walk Test. ISWT = Incremental Shuttle Walk Test. SF-36 = Short Form 36. HADS = Hospital Anxiety and Depression Scale. EQ5D = EuroQol 5 Dimensions. FIM = Functional Independence Measure. SF-8 = Short Form 8. TUAG = Timed Up And Go. BMI = body mass index.*

### *Evaluation of post hospital discharge rehabilitation programmes*

Four of the programmes reported reassessment of baseline measures as a form of evaluation of the programme. However, subjective clinician judgement was the most commonly utilised form of evaluation followed by the objective changes in walking tests and physical function. Physiological parameters, such as target perceived rate of exertion and heart rate, and results of balance assessments were used infrequently in the evaluation of the response to the rehabilitation programme. Exercise capacity and health-related quality of life outcome measures were the most commonly utilised. Interestingly, none of the programmes incorporated the use of the repetition maximum principle to prescribe strengthening exercises.

### **E3. Individual comments made by respondents regarding barriers to offering post hospital rehabilitation discharge services and use of alternative rehabilitation streams.**

The following free-text comments were made by respondents regarding barrier to offering specific post hospital discharge rehabilitation programmes and further elucidate the themes of funding restriction, resource allocation/availability (including staffing) and strategic management priorities as key limiting factors. (Note: words in italics added by the author for full interpretation):

"...we at times struggle to fight for staff for in pt rehab (*in-patient rehabilitation*) let alone fight for a budget for op (*out-patient*) care

"...we run a voluntary f-u (*follow-up*) clinic but have had to withdraw the rehab (*rehabilitation*) and psych (*psychology*) elements due to no (sic) support from therapy managers

1  
2  
3 "...despite extensive work the business case was declined  
4

5 "...a rehab (*rehabilitation*) programme was run for 12m using charitable funds  
6 money. Ongoing funding was not secured as it was not deemed a Trust priority  
7

8  
9 "...historically no service available, no need established by current ICU services  
10

11 "...and not considered required at managerial level; Some years ago charitable  
12 funding was available to open follow-up clinic to include rehab (*rehabilitation*)  
13 service but Trust board refused the 2 year funding as they could not commit to  
14 continuing to fund the service once the charitable monies expired. So the reason  
15 we didn't introduce the service at that time was a mix of funding and managerial  
16 issues. Currently I would think staffing would be another issue.  
17  
18

19 "...previously ran post ICU rehab (*rehabilitation*) class but had to stop because reduced  
20 staffing (prioritising in-pt) and difficult to get numbers (no transport provided)  
21

22  
23 "...The main barriers to this aspect are time constraints, lack of staff and funding  
24 alongside limited knowledge of potential co-morbidities following ICU stay. Critical  
25 Care follow up clinics do not take place in an adequate time frame in this trust and  
26 as such many people do not attend, therefore we are missing potential problems.  
27 Additionally the clinic is not an MDT run clinic, limiting clinical identification of  
28 potential problems.  
29

30  
31 "...absence of vertical integration of health and social care  
32

33  
34 "...not so much not considered as required - sure the team believe it's required just  
35 not enough resources  
36

37 "6.5WTE PT (6.5 *whole-time equivalent physiotherapists*) in team covering 7  
38 different ward specialities, 3x critical care areas, resp o/p (*respiratory out-*  
39 *patients*), resp pts (*respiratory patients*) in A&E/admissions  
40  
41  
42  
43  
44

45 Other comments described the interaction between acute and primary care services, which  
46  
47 in some cases offer a route for ongoing rehabilitation input, and clinical and logistical factors  
48  
49 for consideration in determining need for specific critical care services:  
50

51  
52  
53 "...inpt (in-patient) and outpt (out-patient) services are provided by two separate  
54 organisations, therefore although the inpt (*in-patient*) team would like to provide a  
55 service the community team will not lend support  
56

57 "...pt (*patient*) needs met by other community services available  
58  
59  
60



1  
2  
3  
4 "...not sure if we would have individual class therefore combined with PR  
5 (*pulmonary rehabilitation*); we would like to set one-up  
6

7  
8 "...numbers are very small and tends to be post-op (*post-operative*); back to  
9 baseline 5/7 (*at five days*). not seen need to provide service separate to our IRS (*in-*  
10 *patient rehabilitation or integrated respiratory service*)  
11

12  
13 "...We have a follow up clinic run by our CCORT (*critical care outreach team*), but  
14 no physical rehab (*rehabilitation*) post D/C (*discharge*) home (unless needing  
15 regular community physio (*physiotherapy*) input)  
16

17  
18 "...very structured in hospital critical care rehab (*rehabilitation*) service to  
19 maximise pt (*patient*) status at hospital d/c (*discharge*), has significantly reduced  
20 LOS (*length of stay*), readmissions to critical care, QOL (*quality of life*) scores and  
21 ongoing co-morbidity/health problems. Insufficient numbers for group rehab  
22 (*rehabilitation*) specific to CCD (*critical care disease*) post d/c (*discharge*)  
23

24  
25 "...patients who need long-term rehab (*rehabilitation*) are followed up by  
26 community staff  
27

28  
29 "...we use PR (*pulmonary rehabilitation*) programme for many post ITU patients  
30

31  
32 "...cardiac patients go to CR (*cardiac rehabilitation*)  
33  
34  
35  
36  
37  
38  
39  
40  
41  
42  
43  
44  
45  
46  
47  
48  
49  
50  
51  
52  
53  
54  
55  
56  
57  
58  
59  
60

1  
2  
3  
4  
5  
6  
7  
8  
9  
10  
11  
12  
13  
14  
15  
16  
17  
18  
19  
20  
21  
22  
23  
24  
25  
26  
27  
28  
29  
30  
31  
32  
33  
34  
35  
36  
37  
38  
39  
40  
41  
42  
43  
44  
45  
46  
47  
48  
49  
50  
51  
52  
53  
54  
55  
56  
57  
58  
59  
60

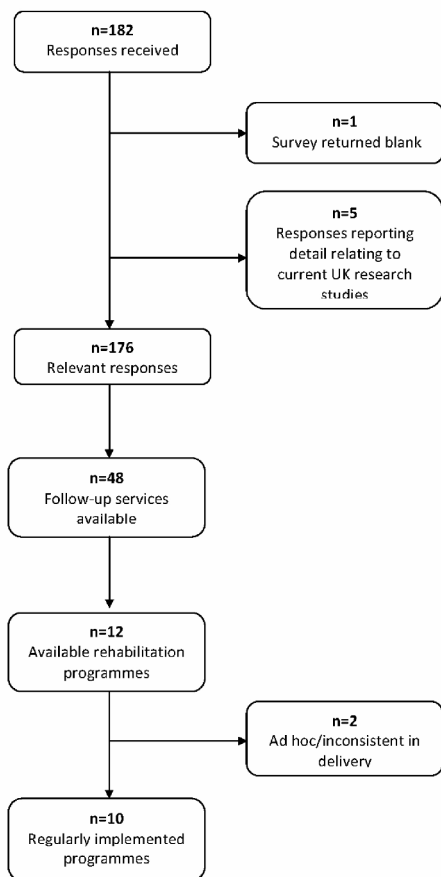

**Figure E1.** Flow-chart outlining available follow-up services and rehabilitation programmes for survivors of critical illness post hospital discharge

1

Figure E1. Flow-chart outlining available follow-up services and rehabilitation programmes for survivors of critical illness post hospital discharge  
208x278mm (300 x 300 DPI)

# BMJ Open

## A UK Survey of Rehabilitation Following Critical Illness: Implementation of NICE Clinical Guidance 83 (CG83) Following Hospital Discharge

|                                 |                                                                                                                                                                                                                                                                                                                                                                                                                                                                                                                           |
|---------------------------------|---------------------------------------------------------------------------------------------------------------------------------------------------------------------------------------------------------------------------------------------------------------------------------------------------------------------------------------------------------------------------------------------------------------------------------------------------------------------------------------------------------------------------|
| Journal:                        | <i>BMJ Open</i>                                                                                                                                                                                                                                                                                                                                                                                                                                                                                                           |
| Manuscript ID:                  | bmjopen-2014-004963.R1                                                                                                                                                                                                                                                                                                                                                                                                                                                                                                    |
| Article Type:                   | Research                                                                                                                                                                                                                                                                                                                                                                                                                                                                                                                  |
| Date Submitted by the Author:   | 01-Apr-2014                                                                                                                                                                                                                                                                                                                                                                                                                                                                                                               |
| Complete List of Authors:       | Connolly, Bronwen; King's College London, Asthma, Allergy and Lung Biology<br>Douiri, Abdel; King's College London, Primary Care And Public Health Sciences<br>Steier, Joerg; Guy's & St.Thomas' NHS Foundation Trust, Lane Fox Clinical Respiratory Physiology Research Unit<br>Moxham, John; King's College London, Asthma, Allergy and Lung Biology<br>Denehy, Linda; The University of Melbourne, Physiotherapy, School of Health Sciences<br>Hart, Nicholas; King's College London, Asthma, Allergy and Lung Biology |
| <b>Primary Subject Heading</b>: | Intensive care                                                                                                                                                                                                                                                                                                                                                                                                                                                                                                            |
| Secondary Subject Heading:      | Evidence based practice, Epidemiology, Health policy, Rehabilitation medicine                                                                                                                                                                                                                                                                                                                                                                                                                                             |
| Keywords:                       | Adult intensive & critical care < ANAESTHETICS, Adult intensive & critical care < INTENSIVE & CRITICAL CARE, REHABILITATION MEDICINE                                                                                                                                                                                                                                                                                                                                                                                      |
|                                 |                                                                                                                                                                                                                                                                                                                                                                                                                                                                                                                           |

SCHOLARONE™  
Manuscripts

1  
2  
3 **A UK Survey of Rehabilitation Following Critical Illness: Implementation of NICE Clinical**  
4  
5 **Guidance 83 (CG83) Following Hospital Discharge**  
6  
7  
8

9  
10 **B Connolly<sup>1, 2, 3</sup> Clinical Research Fellow, A Douiri<sup>4</sup> Lecturer in Medical Statistics, J Steier<sup>3</sup>**  
11  
12 **Consultant in Sleep and Respiratory Medicine, J Moxham<sup>1</sup> Professor of Respiratory**  
13  
14 **Medicine, L Denehy<sup>5</sup> Professor of Physiotherapy, N Hart<sup>1, 2, 3</sup> Consultant in Respiratory and**  
15  
16 **Critical Care Medicine**  
17  
18  
19

20  
21  
22 <sup>1</sup>Department of Asthma, Allergy & Respiratory Science

23  
24 Division of Asthma, Allergy and Lung Biology, King's College London

25  
26 5<sup>th</sup> Floor Tower Wing, Guy's Hospital

27  
28 London, SE1 9RT, UK

29  
30  
31 <sup>2</sup>Guy's & St Thomas' NHS Foundation Trust and King's College London

32  
33 National Institute of Health Research Biomedical Research Centre,

34  
35 16<sup>th</sup> Floor Tower Wing, Guy's Hospital

36  
37 London, SE1 9RT, UK

38  
39  
40 <sup>3</sup>Lane Fox Clinical Respiratory Physiology Research Unit

41  
42 St.Thomas' Hospital, Guy's & St.Thomas' NHS Foundation Trust

43  
44 Westminster Bridge Road,

45  
46 London, SE1 7EH, UK

47  
48  
49 <sup>4</sup>Department of Public Health Sciences

50  
51 King's College London

52  
53 5<sup>th</sup> Floor, Capital House

54  
55 Guy's Hospital  
56  
57  
58  
59  
60

1  
2  
3 London, SE1 3QD, UK  
4

5<sup>5</sup>Department of Physiotherapy  
6

7 School of Health Sciences, University of Melbourne  
8

9  
10 Parkville, 3010, Melbourne, Australia  
11

12  
13  
14  
15 **Corresponding author**  
16

17 Bronwen Connolly  
18

19 Research Office, Lane Fox Respiratory Unit  
20

21 Ground Floor, South Wing  
22

23 St.Thomas' Hospital, Guy's & St.Thomas' NHS Foundation Trust  
24

25 Westminster Bridge Road  
26

27 London, SE1 7EH, UK  
28

29 Tel: +44 20 7188 8070  
30

31 Email: [bronwen.connolly@nhs.net](mailto:bronwen.connolly@nhs.net)  
32  
33

34  
35  
36  
37  
38 **Word Count** 4075  
39

40  
41  
42  
43 **Key words**  
44

45 Critical illness, rehabilitation, guidelines, implementation, survey  
46  
47  
48  
49  
50  
51  
52  
53  
54  
55  
56  
57  
58  
59  
60

**ABSTRACT****Objective**

To determine the implementation of National Institute for Health and Care Excellence guidance (NICE CG83) for post hospital discharge critical illness follow-up and rehabilitation programmes.

**Design**

Closed-question postal survey.

**Setting**

Adult intensive care units (ICU), across the UK, identified from national databases of organisations. Specialist-only and private ICUs were not included.

**Participants**

Senior respiratory critical care physiotherapy clinicians.

**Results**

A representative sample of 182 surveys were returned from 240 distributed (75.8% (95%CI 70.4-81.2)). Only 48 organisations (27.3% (95%CI 20.7 to 33.9)) offered a follow-up service 2-3 months following hospital discharge, the majority (n=39, 84.8%) in clinic format. Twelve organisations reported post hospital discharge rehabilitation programmes (6.8% (95%CI 3.1 to 10.5)), albeit only ten of these operated on a regular basis. Lack of funding was reported as both the most frequent (n=149/164, 90.0%) and main barrier (n=99/156, 63.5%) to providing services. Insufficient resources (n=71/164, 43.3%) and lack of priority by the clinical management team (n=66/164, 40.2%) were also highly cited barriers to service delivery.

**Conclusion**

1  
2  
3 NICE CG83 has been successful in profiling the importance of rehabilitation for survivors of  
4  
5 critical illness. However, four years following publication of CG83 there has been limited  
6  
7 development of this clinical service across the UK. Strategies to support delivery of such  
8  
9 quality improvement programmes are urgently required to enhance patient care.  
10  
11  
12  
13

#### 14 **Word Count**

15  
16  
17 216  
18  
19  
20  
21

#### 22 **Article summary**

##### 23 **Strengths and limitations of this study**

- 24  
25  
26 • This is the largest, and most comprehensive survey conducted across the UK of post  
27  
28 hospital discharge follow-up and rehabilitation for survivors of critical illness  
29  
30
- 31  
32 • Data from this survey indicate a low reported prevalence of available services, with  
33  
34 barriers to service implementation reported by clinicians examined in detail  
35  
36
- 37  
38 • This survey was profession-specific, directed only to physiotherapy clinicians rather  
39  
40 than multiple members of the interdisciplinary team  
41  
42
- 43  
44 • Specialist-only and private organisations were excluded, which may have provided  
45  
46 additional, potentially beneficial data  
47  
48  
49  
50  
51  
52  
53  
54  
55  
56  
57  
58  
59  
60

## INTRODUCTION

Intensive care unit (ICU) admission with critical illness can have catastrophic and often long-term consequences for survivors. Physical and psychological impairments including reduced exercise capacity and health-related quality of life can persist for many years following hospital discharge [1-4]. These features are now referred to as the 'post intensive care syndrome' [5]. In recent years the importance of survivorship, or quality of survival, has been increasingly recognised [6], and the role of rehabilitation interventions to facilitate the recovery pathway of patients have become a major focus for the clinician [7].

In the UK, the National Institute of Health and Care Excellence (NICE) in 2009 published clinical guideline 83 (CG83) focussed on 'Rehabilitation After Critical Illness' (available at <http://publications.nice.org.uk/rehabilitation-after-critical-illness-cg83>). This profiled the importance of this area of clinical practice aiming to improve the standards of care and previously unmet clinical needs of this patient group. NICE CG83 advocated a continuum of multidisciplinary rehabilitation along the recovery pathway from within the ICU to the ward and following hospital discharge, albeit these recommendations were largely based on expert consensus due to the lack of published evidence [8]. Specifically, at the point of hospital discharge, it is recommended that patients are referred to appropriate rehabilitation services if ongoing needs are identified. At 2-3 months following hospital discharge, a review and functional reassessment of the patient should be undertaken to determine the extent of recovery and additional rehabilitation input in the event of a slower than anticipated recovery or identification of new physical and/or psychological morbidity [8].



1  
2  
3 Despite the intentions, widespread clinical implementation of these guidelines has been  
4  
5 challenged by the limited evidence underpinning the recommendations, as well as sparse  
6  
7 detail provided to characterise the optimum type, intensity, frequency and duration of  
8  
9 exercise therapy and rehabilitation interventions [9]. Furthermore, critical care survivors  
10  
11 experience inadequate and disjointed multidisciplinary care following hospital discharge  
12  
13 with inconsistent service provision, which can be strongly influenced by local resources and  
14  
15 geographical location [10].  
16  
17  
18  
19

20  
21 Failure to implement national guidelines or respond to published evidence is not  
22  
23 uncommon. Disparity between the prevalence of conditions such as chronic  
24  
25 cardiorespiratory disease, diabetes mellitus and sleep-related disorders, and availability of  
26  
27 recommended services for their management, is evident across the UK [11-13]. Previous  
28  
29 surveys relating to provision of critical care rehabilitation have focussed on ICU follow-up  
30  
31 [14] or physiotherapy practice within the ICU [15-17]. Two recent surveys reported on NICE  
32  
33 CG83, but these were limited in content and detail [18 19]. The aim of the current study  
34  
35 was to comprehensively determine, across the UK, implementation of NICE CG83 during the  
36  
37 post hospital discharge period with detailed characterisation of available follow-up and  
38  
39 rehabilitation services, and including establishing barriers to service provision.  
40  
41  
42  
43  
44  
45  
46  
47

## 48 **METHODS**

49  
50 Details for all adult ICUs across the UK (England, Scotland, Wales and Northern Ireland) were  
51  
52 obtained via two central registries; the Intensive Care National Audit and Research Centre  
53  
54 (ICNARC) and the Scottish Intensive Care Society Audit Group (SICSAG). A total of 240  
55  
56  
57  
58  
59  
60

1  
2  
3 organisations were identified (85 university teaching (UT) hospitals and 155 district general  
4 (DG) hospitals). Specialist-only and private ICUs were excluded were from survey.  
5  
6  
7

8  
9  
10 The authors designed a predominantly closed-question survey (Web file 1) to evaluate  
11 clinical practice regarding follow-up and rehabilitation services for survivors of critical illness  
12 post hospital discharge. Demographic details were requested regarding number, type and  
13 bed-capacity of critical care areas at each organisation. In addition, detail of service  
14 provision including follow-up, content, delivery and evaluation of rehabilitation programmes  
15 was requested, and barriers to offering services were sought if none were currently in  
16 operation. The majority of questions allowed respondents to select from multiple options  
17 with space available for free-text comments throughout. These options were not ranked,  
18 nor were respondents asked to mark their response in terms of perceived importance or  
19 grading, with the exception of asking respondents to detail the main limiting barrier to  
20 service availability. The survey was piloted using three senior physiotherapy clinicians and  
21 clinical-academics (ICU clinical experience ranging 7-14 years) at two tertiary referral  
22 university teaching hospitals in London, UK. Constructive critique of survey design, content,  
23 structure, user-acceptability and time for completion was requested, following which  
24 further refinement was undertaken.  
25  
26  
27  
28  
29  
30  
31  
32  
33  
34  
35  
36  
37  
38  
39  
40  
41  
42  
43  
44  
45  
46  
47

48 In March 2013, the survey and a covering letter of invitation to participate were distributed  
49 by post to the senior physiotherapist for critical care at each of the organisations with an  
50 included ICU. Stamped, self-addressed envelopes (SAEs) were enclosed for return of  
51 completed surveys. Surveys were coded to identify responses. Throughout the period of  
52 survey distribution a variety of strategies were employed to assist with survey promotion  
53  
54  
55  
56  
57  
58  
59  
60

1  
2  
3 and enhance rates of completion and return. Six weeks following initial survey distribution,  
4  
5 a reminder letter was sent by post to non-responders with a second copy of the survey and  
6  
7 further SAEs. A further six weeks later, telephone calls were made to remaining non-  
8  
9 responders. Direct contact was attempted with the senior critical care physiotherapist to  
10  
11 determine willingness to participate, who were offered the choice of telephone or email  
12  
13 completion of the survey. Respondents were also contacted via email or telephone if there  
14  
15 were missing data.  
16  
17  
18  
19

## 20 21 22 **Data Handling**

23  
24 In line with guidance produced by the UK National Research Ethics Service (available at  
25  
26 <http://www.nres.nhs.uk/>) the project was deemed an evaluation of service provision, and  
27  
28 therefore ethical approval was not required. Completion and return of the survey was  
29  
30 considered indicative of willingness to participate in the survey and implied consent. All  
31  
32 data were stored in standard spreadsheets, transcribed from hard copies of returned  
33  
34 surveys. Due to the nature of the study and data collected, descriptive statistics were used  
35  
36 to analyse quantitative responses including number, percentage and 95% confidence  
37  
38 intervals where appropriate, and additional qualitative review of free-text comments made.  
39  
40  
41 A response rate of 65% rate was considered *a priori* to provide a representative sample.  
42  
43  
44  
45  
46  
47

## 48 **RESULTS**

### 49 50 **Responding institutions**

51  
52 One hundred and eighty-two of the 240 distributed surveys were returned, indicating an  
53  
54 overall response rate of 75.8% (95%CI 70.4 to 81.2) (*Figure 1*). Specifically, nearly three-  
55  
56 quarters of all surveys distributed to both university teaching (UT) and district general (DG)  
57  
58  
59  
60

1  
2  
3 hospitals were returned (66/85, 75% and 115/155, 74.2% respectively) indicating that the  
4  
5 groups of respondents were a representative sample of the original cohort of organisations.  
6  
7 One survey was returned blank with the respondent indicating that they lacked sufficient  
8  
9 time for completion. Demographic data for the hospitals surveyed are reported in *Table 1*.  
10  
11 The majority were district general (DG) hospitals with ICUs and high dependency units  
12  
13 (HDUs) managing mixed general medical and surgical patient casemixes. A large number of  
14  
15 responses reported 'combination' units accepting both Level 3 and 2 patients (*Table 2*).  
16  
17  
18  
19

20  
21  
22 Five respondents reported that available rehabilitation programmes at their organisations  
23  
24 were the direct result of active research studies (*Figure E1, Web only file 2*). These  
25  
26 responses were excluded as the aim of the survey was to characterise current clinical  
27  
28 practice rather than research activity. These five respondents completed the section asking  
29  
30 for barriers to offering a clinical service had the research study not been implemented.  
31  
32  
33  
34  
35  
36  
37  
38  
39  
40  
41  
42  
43  
44  
45  
46  
47  
48  
49  
50  
51  
52  
53  
54  
55  
56  
57  
58  
59  
60

**Table 1.** Demographics of respondent organisations

| Characteristic                                                           | n (%)      |
|--------------------------------------------------------------------------|------------|
| Response rate according to UK country                                    |            |
| England                                                                  | 145 (75.1) |
| Scotland                                                                 | 20 (87.0)  |
| Wales                                                                    | 12 (80.0)  |
| Northern Ireland                                                         | 5 (55.6)   |
| Type of hospital                                                         |            |
| University teaching                                                      | 66 (36.5)  |
| District general                                                         | 115 (63.5) |
| Total number of Critical Care Units*                                     |            |
| Level 3 (ICU)                                                            | 112        |
| Level 2 (HDU)                                                            | 170        |
| Combination Level 3 and 2 units                                          | 98         |
| Total number of Critical Care Beds*                                      |            |
| Level 3 (ICU)                                                            | 1007       |
| Level 2 (HDU)                                                            | 1090       |
| Combination Level 3 and 2 units                                          | 1354       |
| Frequency of reported types of patients admitted to Critical Care Unit*# |            |
| General                                                                  | 230        |
| Surgical                                                                 | 52         |
| Medical                                                                  | 38         |
| Cardiac/Cardiology/Cardiothoracic                                        | 35         |
| Neurological                                                             | 22         |
| Respiratory                                                              | 17         |
| Trauma                                                                   | 14         |
| Renal                                                                    | 5          |
| Burns                                                                    | 4          |
| Liver                                                                    | 4          |
| ENT                                                                      | 3          |
| Other~                                                                   | 10         |

n=181 responses (except for response rate according to country, n=192 responses). Critical care units and bed numbers refers to the total number within respondent organisations overall e.g. one organisation may have multiple critical care areas. \*n=2 non-responses. #Data presented indicates frequency of reported occurrence of type. Multiple responses could be given. ~Other e.g. haematology, infectious disease, maxillo-facial, vascular.

Abbreviations: ICU = intensive care unit. HDU = high dependency unit. ENT = ear, nose, throat.

**Table 2.** Classifications of level of clinical care provided to patients

| Level | Classification                                                                                                                                                                                                              |
|-------|-----------------------------------------------------------------------------------------------------------------------------------------------------------------------------------------------------------------------------|
| 0     | Patients whose needs can be met through normal ward care in an acute hospital.                                                                                                                                              |
| 1     | Patients at risk of their condition deteriorating, or those recently located from higher levels of care, whose needs can be met on an acute ward with additional advice and support from the critical care team.            |
| 2     | Patients requiring more detailed observation or intervention including support for a single failing organ system or post-operative care and those 'stepping down' from higher levels of care.                               |
| 3     | Patients requiring advanced respiratory support alone or basic respiratory support together with support of at least two organ systems. This level includes all complex patients requiring support for multi-organ failure. |

From Comprehensive Critical Care, DH, 2000 [20]

### Post hospital discharge follow-up clinical services

Forty-eight organisations (27.3%, 95%CI (20.7 to 33.9)) reported availability of follow-up of post critical illness patients at 2-3months following hospital discharge (*Figure E1, Web only file 2 and 3*). Thirty-two (66.7%) of these were from DG hospitals and 16 (33.3%) from university teaching (UT) hospitals. Forty-five organisations offering follow-up were located in England, two in Scotland, one in Northern Ireland and none in Wales. Two respondents did not provide details of follow-up provision. Of the remaining responses (n=46), ICU follow-up clinics were the most frequently reported form of follow-up (n=39, 84.8%) (*Table 3*). Eleven respondents reported more than one form of follow-up was in place.

**Table 3.** Follow-up services for critical care survivors post hospital discharge

| <b>Form of follow-up</b>             | <b>n (%)</b> |
|--------------------------------------|--------------|
| ICU follow-up clinic                 | 39 (84.8)    |
| Rehabilitation class                 | 10 (21.7)    |
| Other                                | 6 (13.0)     |
| Did not specify                      | 2 (4.3)      |
| Postal survey                        | 1 (2.2)      |
| Telephone call                       | 1 (2.2)      |
| Medical outpatient appointment       | 0 (0)        |
| <b>Multidisciplinary team member</b> | <b>n (%)</b> |
| Physiotherapist                      | 43 (89.6)    |
| Critical Care nurse                  | 42 (87.5)    |
| Critical Care doctor                 | 31 (64.6)    |
| Psychologist                         | 10 (20.8)    |
| Dietician                            | 2 (4.2)      |
| Occupational therapist               | 2 (4.2)      |
| <b>Content of follow-up</b>          | <b>n (%)</b> |
| HRQL                                 | 40 (83.3)    |
| Psychological status                 | 39 (81.3)    |
| Medical status                       | 34 (70.8)    |
| Nursing-related issues               | 29 (60.4)    |
| Exercise capacity                    | 28 (58.3)    |
| Diet/nutrition                       | 24 (50.0)    |
| Other                                | 9 (18.8)     |

For follow-up, n=frequency of reported occurrence out of 46 responses. Multiple forms of follow-up could be indicated. Other included informal coffee morning, patient support group, physiotherapy outreach, ad hoc appointments with ICU nursing staff. For multidisciplinary team members, n=frequency of reported occurrence out of 48 responses. Multiple team members could be listed. For follow-up content, n=frequency of reported occurrence out of 48 responses. Multiple content could be listed. Other included 'problem-based' or 'patient-dependent' discussion

*Abbreviation: ICU = intensive care unit. HRQL = health-related quality of life.*

1  
2  
3 Forty-three (89.6%) respondents reported that physiotherapists were part of the  
4  
5 multidisciplinary team (MDT) involved in follow-up of post critical illness patients. However,  
6  
7 just under one-third of these, n= 13 (30.2%), reported that this was on an *ad hoc* referral  
8  
9 basis only. Other MDT members involved in follow-up are detailed in *Table 3*. In five cases  
10  
11 access to critical care doctors, occupational therapists, psychologists or dieticians was also  
12  
13 reported to be on a referral basis only. Critical care nurses were the most consistently  
14  
15 featured MDT members and occupational therapists and dieticians were rarely involved in  
16  
17 follow-up. The scale of MDT involvement ranged from one member (10.4%) to five  
18  
19 members (2.0%), with three being the most common (43.8%). No other healthcare  
20  
21 professionals, other than those listed, were documented to be part of the MDT.  
22  
23  
24  
25  
26  
27  
28

29 Nearly half of those with follow-up services included a functional reassessment for  
30  
31 comparison with assessment conducted at the time of hospital discharge (n = 20, 42.6%).  
32  
33 *Table 3* details other aspects of follow-up assessments; health-related quality of life (n = 40,  
34  
35 83.3%) and psychological status (n= 39, 81.3%) were the most frequently reported items.  
36  
37 Exercise capacity and nursing-related issues were included in approximately half of cases.  
38  
39  
40  
41  
42

### 43 **Availability of post hospital discharge rehabilitation programmes**

44  
45 Twelve organisations reported a rehabilitation programme was available following hospital  
46  
47 discharge for post critical illness patients (6.8%, 95% CI (3.1 to 10.5)) (*Figure E1, Web only*  
48  
49 *file 2*). Two reported that their programme was only available on an *ad hoc* basis only. Of  
50  
51 the remaining ten programmes implemented on a regular basis, 4 (40%) were conducted at  
52  
53 UT hospitals and 6 (60%) at DG hospitals), and all based at organisations in England. All had  
54  
55  
56  
57  
58  
59  
60



1  
2  
3 also reported offering a follow-up service, with eight of these in the form of an ICU follow-  
4  
5 up clinic.  
6  
7

8  
9  
10 Senior ICU physiotherapists led all available rehabilitation programmes, with the exception  
11  
12 of one led by a rehabilitation physiotherapist. The majority (n=9) were hospital-based,  
13  
14 outpatient programmes, specific for post critical illness patients. Exercise was a component  
15  
16 of all programmes including cardiovascular, muscle strength, balance and functional  
17  
18 activities. Exercise prescription was usually based on clinician judgement, and on occasion  
19  
20 using results of physical assessment of walking capacity of function. Clinical and  
21  
22 physiological parameters were used to monitor exercise intensity during sessions. Less than  
23  
24 half of all programmes (n=4) included education sessions. Measures used to evaluate  
25  
26 effectiveness of these rehabilitation programmes varied greatly with exercise capacity and  
27  
28 health-related quality of life most commonly reported.  
29  
30  
31  
32  
33

34  
35  
36 Further detail on the leadership, format and structure, content and monitoring and  
37  
38 evaluation of available post hospital discharge rehabilitation programmes can be found in  
39  
40 Web only file 2.  
41  
42

#### 43 44 45 **Barriers to delivery of post hospital discharge rehabilitation programmes**

46  
47 Respondents were requested to report the barriers to delivery of post hospital discharge  
48  
49 rehabilitation programmes from a non-hierarchical list including clinical, pragmatic,  
50  
51 managerial and administrative options. From the reasons selected, respondents were also  
52  
53 requested to confirm the main reason. From a potential 171 responses, there were seven  
54  
55 non-responses to both parts of this question (n=164), and a further 8 non-responses to  
56  
57  
58  
59  
60

specifying the main barrier (n=156). 91% (n = 149) of respondents reported lack of funding as one barrier to offering a post hospital discharge rehabilitation programme, and 75% reported lack of staff (Table 4). Only 2.4% of respondents reported that a lack of evidence and less than 1% of respondents reported time constraints as barriers to implementing a post hospital discharge rehabilitation programme. 6% (10/164) of respondents reported only one barrier, 20% (33/164) reported two barriers and 73% (120/164) reported greater than two barriers.

**Table 4.** Barriers to post hospital discharge rehabilitation programmes for survivors of critical illness

| Barrier                                                      | Frequency reported overall, n (%) | Frequency reported as main barrier, n (%) |
|--------------------------------------------------------------|-----------------------------------|-------------------------------------------|
| Lack of funding                                              | 149 (90.9)                        | 99 (63.5)                                 |
| Lack of sufficient staff                                     | 128 (78.0)                        | 17 (10.9)                                 |
| Resources prioritised to other patient groups/clinical areas | 71 (43.3)                         | 4 (2.7)                                   |
| Not considered required service at managerial level          | 66 (40.2)                         | 22 (14.1)                                 |
| Lack of available space                                      | 50 (30.5)                         | 2 (1.3)                                   |
| Insufficient patient numbers to justify                      | 35 (21.3)                         | 11 (7.1)                                  |
| Extra-contractual (out-of-area) patient caseload             | 15 (9.1)                          | 0 (0.0)                                   |
| Lack of trained staff                                        | 13 (7.9)                          | 0 (0.0)                                   |
| No evidence                                                  | 4 (2.4)                           | 0 (0.0)                                   |
| Not sure what to include in a programme                      | 2 (1.2)                           | 0 (0.0)                                   |
| Other (time constraints)                                     | 1 (0.6)                           | 1 (0.6)                                   |

For frequency of reported barriers overall, n=164 responses. For frequency of reporting as main barrier, n=156 responses. (n=182 responses, excluding one blank response, ten non-applicable responses relating to rehabilitation programmes in regular operation, seven non-responses to both parts of this question, and a further eight non-responses to specifying the main barrier).

### Alternative rehabilitation programmes

57.3% (98/171) of respondents reported that in the absence of a specific post hospital discharge rehabilitation programme for survivors of critical illness at their organisation, patients were referred into alternative rehabilitation streams, including pulmonary rehabilitation (PR) (62/98, 63.3%) and cardiac rehabilitation (38/98, 38.8%) (e.g. those patients post cardiac surgery and post myocardial infarction) and various community-based services (59/98; 60.2%). Free-text comments from respondents regarding barriers to offering rehabilitation programmes and the use of alternative rehabilitation streams for ICU survivors following hospital discharge can be found in the Data Supplement (E3).

### DISCUSSION

These data from the first comprehensive UK survey highlight the limited implementation of NICE CG83 and the poor delivery across the UK of post hospital rehabilitation services for survivors of critical illness. Indeed, of one-hundred and eighty-two surveys returned, less than one-third of all institutions surveyed provided any form of follow-up for these patients. Of major clinical concern is that only 5% of respondents reported the provision of a regular rehabilitation programme for critical illness survivors, a major focus of CG83. A lack of funding was the most frequently reported and main barrier to service availability. Furthermore, lack of managerial support for this type of service and prioritisation of resource allocation to other clinical areas were reported as barriers by over 40% of the respondents. These data indicate that inadequate clinical infrastructure exists for hospitals and community teams to successfully adhere to NICE CG83. The limited impact of NICE guidance on clinical practice is not unique to critical care rehabilitation and is, rather

1  
2  
3 disappointingly, a theme observed in other areas of healthcare that have been subject to  
4  
5 the development of NICE guidelines.  
6  
7  
8  
9

### 10 **Implementation of NICE CG83 across the UK**

11  
12 The lack of implementation of NICE CG83 evident from these data could have reflected poor  
13  
14 motivation on the part of clinicians to actively engage in the delivery of recommendations.  
15

16  
17 However, the key barriers to service delivery were reported as lack of funding, limited  
18  
19 resources and infrastructure with reduced priority at managerial level. In the modern  
20

21  
22 National Health Service (NHS), such obstacles to the application of NICE CG83 are at either a  
23  
24 clinical commissioning or clinical operational level, or both, rather than at the level of the  
25

26  
27 clinicians. Interestingly, the paucity of data to support the effectiveness of post ICU  
28  
29 rehabilitation was not perceived as a barrier by the vast majority of clinicians, and highlights  
30

31  
32 the complexities in the management and clinical delivery of a critical care rehabilitation  
33  
34 service. A conflict between clinicians, managers and commissioners has developed as the  
35

36  
37 lack of high level clinical evidence supporting NICE CG83 provides a major challenge to the  
38  
39 funding of a critical care survivor rehabilitation service by both managers and  
40

41  
42 commissioners. Of note, the survey identified five respondents who reported availability of  
43  
44 post hospital discharge rehabilitation services as part of existing research studies ([21-23],  
45

46  
47 examining the effect of various exercise-based interventions delivered in outpatient settings  
48  
49 to post critical illness patients following hospital discharge. At present, only abstract data  
50

51  
52 are available from one of these studies, that demonstrate a significant improvement in  
53  
54 exercise capacity and balance as a result of the intervention [24]. Further data from this,  
55

56  
57 and other similar studies, will assist in establishing the evidence-base post critical illness  
58  
59 rehabilitation.  
60

### **Alternatives to post hospital discharge rehabilitation programmes**

Rehabilitation for survivors of critical illness is a complex intervention [25], that requires further translational work and clinical trials to provide the evidence [26-28]. Until these data are available, the unmet clinical need will remain evident and unaddressed. Referral into established rehabilitation programmes, such as cardiac and pulmonary rehabilitation, offers one potential resolution with over 50% of respondents reported the use of other rehabilitation programmes for the critical care survivors, and this may further be influenced by the designated speciality of the ward destination of patients following ICU discharge. Indeed the up-to-date guidelines for pulmonary rehabilitation [29], advocate individualised patient management and these interventions could be easily adapted for patients recovering from critical, albeit that additional referrals places an increased burden these services. However, whilst valuable resources, these programmes are disease-specific and may not fully address the range of impairments demonstrated by survivors of critical illness as part of 'post intensive care syndrome' [5].

### **The clinical usefulness of post ICU clinics**

Post-ICU clinics provided the majority of available follow-up services in the current survey. Profiled in the late 1990s and early 2000s following updating of the NHS agenda for critical care [20 30], these clinics have been reported by patients to play a valuable contribution to their physical, emotional and psychological recovery [31]. However, trial data have failed to demonstrate clinical effectiveness or cost benefit [32]. An alternative approach to the conduct and purpose of post ICU clinics would be to robustly monitor over time the trajectory of recovery of ICU survivors with onward referral into specific speciality care where identified as required. Wide variability in responses regarding post hospital discharge

1  
2  
3 rehabilitation programmes for ICU survivors severely limits any consensus on the optimum  
4  
5 approach for these services. The marked heterogeneity of the patient population makes it  
6  
7 increasingly likely that a bespoke, individualised approach, akin to the approach of  
8  
9 personalised medicine, may be more appropriate.  
10  
11  
12  
13

### 14 **Barriers to implementation of national guidelines**

15  
16  
17 The implementation of, and adherence to, a clinical guideline can be inconsistent [33 34].  
18  
19 The limited detail in terms of the rehabilitation programme in the guideline *per se* as well as  
20  
21 local conditions such as staff infrastructure, organisation and resource were the main source  
22  
23 of restriction to implementation of NICE CG83 in the current survey [35]. This is the first  
24  
25 survey to investigate reasons behind failure to implement such a national guideline and  
26  
27 offer significant insight into the requirements necessary for successful clinical application of  
28  
29 recommendations designed to enhance patient care. Whilst the goals of NICE CG83 were  
30  
31 important and raised the profile of this area of clinical practice the influence will be short-  
32  
33 lived without further investment in support systems at operational and staffing level.  
34  
35 Disappointingly, this scenario appears to be mirrored in other common clinical conditions.  
36  
37 Although evidence supports the use of early pulmonary rehabilitation (PR) following acute  
38  
39 exacerbation of chronic obstructive pulmonary disease (AECOPD) to enhance exercise  
40  
41 capacity, health status and reduce hospital readmissions [29 36-38], recent data suggest  
42  
43 that only one-third of eligible patients are referred to early PR programmes and less than  
44  
45 10% of all hospital discharges for AECOPD complete early post-hospitalisation PR [12]. This  
46  
47 implementation failure is also observed following the NICE guidance on the management of  
48  
49 obstructive sleep apnoea [39] with a recent national mapping exercise highlighting a  
50  
51 significant mismatch between predictive healthcare requirements, based on prevalence of  
52  
53  
54  
55  
56  
57  
58  
59  
60

1  
2  
3 known associated risk factors, and delivery of related services [13]. Furthermore, the 2012  
4  
5 NHS Atlas of Variation in Healthcare for People with Diabetes [11] revealed substantial  
6  
7 numbers of patients were not in receipt of the basic clinical standards of care. The barriers  
8  
9 to the implementation of these guidelines are specific to each clinical area, but there are  
10  
11 generic barriers, such as lack of adequate funding and resource, that need to be considered  
12  
13 carefully. However, it must be highlighted that robust clinical trial and other data are  
14  
15 required to support a guideline if it is to be commissioned within the NHS and delivering a  
16  
17 guideline prematurely will lead to implementation failure, despite major enthusiasm by  
18  
19 clinicians.  
20  
21  
22  
23  
24  
25  
26

### 27 **Critique of the method**

28  
29 A major strength of this survey is the employment of a variety of strategies to optimise  
30  
31 completion, resulting in a 76% response rate. Nonetheless, survey non-response is a  
32  
33 challenge to the robustness of the current findings, introducing bias through the potential  
34  
35 for non-responders to differ significantly from responders [40 41]. Despite this, one must  
36  
37 consider this as a most satisfactory return indicating external validity [41 42]. Furthermore,  
38  
39 the sample of respondents was representative of the original cohort. The high response  
40  
41 rate may represent the clinical concern of the respondents in terms of poor implementation  
42  
43 of NICE CG83, in particular, as the core standards for care of the critically ill patient have  
44  
45 been recently published highlighting rehabilitation as an important core clinical care  
46  
47 standard [43].  
48  
49  
50  
51  
52  
53  
54

55 Postal questionnaires can be preferable for conducting surveys of large populations over a  
56  
57 wide geographical range, offering a cost-efficient as well as time-efficient format with often  
58  
59  
60

1  
2  
3 improved response rates in comparison to alternative routes such as telephone interview or  
4  
5 email [44]. Furthermore, an email or internet-based platform would have been restricted in  
6  
7 the current study due to lack of available electronic contact details for named critical care  
8  
9 physiotherapy clinicians, and where postal distribution offered a more standardised  
10  
11 approach for monitoring and identifying respondents. Nonetheless, we acknowledge that in  
12  
13 the current technology climate, many respondents may have preferred this option for  
14  
15 survey participation. We utilised both email and telephone contact at later stages of survey  
16  
17 distribution as a more feasible and less cost-prohibitive means to target previous non-  
18  
19 responders with good effect. Despite encountering some difficulty with locating designated  
20  
21 senior clinicians [45], this resulted in a relatively high conversion rate of 36% of non-  
22  
23 responders. However, we recognise that it was not possible to control who was responsible  
24  
25 for actual completion of the postal surveys returned, and that this may have been by more  
26  
27 junior staff depending on local staffing arrangements, perceived importance and time  
28  
29 constraints of senior clinicians. However, we also specified in the accompanying cover letter  
30  
31 that respondents be in a position to comment on the content of the survey, and therefore  
32  
33 this may have been appropriate for different personnel.  
34  
35  
36  
37  
38  
39  
40  
41  
42

43 The current survey took advantage of a range of design and formatting strategies to  
44  
45 enhance completion, additionally including a personalised cover letter and stamped  
46  
47 addressed envelopes [41 42 46]. Survey review was undertaken during piloting with three  
48  
49 senior physiotherapy clinical-academics, and we aimed to minimise additional burden to  
50  
51 potential respondents by not utilising a larger sample at this stage. Furthermore, we  
52  
53 adopted an approach to survey distribution in keeping with that suggested to minimise non-  
54  
55 response [47]. However, the current survey lacked sufficient demographic or other data  
56  
57  
58  
59  
60



1  
2  
3 regarding non-responders to attempt comparison between the two groups [40 41],  
4  
5 although 95% confidence intervals are narrow supporting the respondents as representative  
6  
7 sample of the whole respondent population.  
8  
9

10  
11  
12 We identified ICUs for inclusion based on data provided by two national registries (ICNARC  
13 and SICSAG). Whilst specialist-only and private institutions were excluded, assuming that  
14  
15 rehabilitation services offered to these patient cohorts may be influenced by disease-  
16  
17 specific or institutional status-related factors, we acknowledge that future survey data  
18  
19 acquired from these organisations may add further benefit to characterising service  
20  
21 provision. We adopted a more rigorous approach to data acquisition than previous similar  
22  
23 surveys that were country-specific [18] or excluded key regions [19], albeit these authors  
24  
25 examined NICE CG83 implementation across the patient pathway and results observed at  
26  
27 the post hospital discharge stage mirrored those of the current study.  
28  
29  
30  
31  
32  
33  
34  
35

36 The current study focussed on post hospital discharge management as it is at this stage that  
37  
38 patients may be more likely to experience insufficient input for reasons such as lack of  
39  
40 available services, repatriation back to other geographical regions or follow-up under non-  
41  
42 ICU teams [48]. In contrast to previous surveys, we examined barriers to service availability  
43  
44 in detail to gain further insight regarding this. Furthermore, rehabilitation for ICU survivors  
45  
46 following hospital discharge has been the focus of recent research interest with randomised  
47  
48 controlled trial data now available [49]. The current survey could be critiqued for being  
49  
50 discipline-specific. However, it was considered that senior critical care physiotherapy  
51  
52 clinicians would be well-informed as key members of the multi-disciplinary team involved in  
53  
54  
55  
56  
57  
58  
59  
60

1  
2  
3 management of ICU survivors, to comment on follow-up and rehabilitation service provision  
4  
5 at their institutions.  
6  
7  
8  
9

## 10 **CONCLUSION**

11  
12 These data from this first comprehensive UK survey of post hospital discharge rehabilitation  
13 programmes for critical illness survivors have demonstrated a low reported prevalence and,  
14 more importantly, this survey has showed a failure to implement NICE CG83. Lack of clinical  
15 prioritisation and funding was reported by the clinicians as the major cause for the failure to  
16 implement the guideline, but the paucity of evidence that supported the guideline must be  
17 regarded as a major contributor to the limited engagement between clinicians, managers  
18 and commissioners to deliver NICE CG83. Without clinical and cost effectiveness evidence  
19 for such a programme, it would be a significant challenge to commission such a service in an  
20 NHS that is driven to commission both clinical and specialist services with an established  
21 evidence base. The focus of the clinicians must be to ensure that clinical guidelines have a  
22 robust and strong evidence base to maximise their implementation and this will result in an  
23 enhancement in patient care that will be both clinical and cost effective.  
24  
25  
26  
27  
28  
29  
30  
31  
32  
33  
34  
35  
36  
37  
38  
39  
40  
41  
42  
43  
44  
45  
46  
47  
48  
49  
50  
51  
52  
53  
54  
55  
56  
57  
58  
59  
60

## ACKNOWLEDGEMENTS

We thank the Intensive Care National Audit and Research Centre, and the Scottish Intensive Care Society Audit Group for assistance with database information for identification of organisations for participation. Furthermore we thank the various clinical and research network colleagues who assisted with promotion of the survey.

## CONTRIBUTORS

BC, LD and NH contributed to the conception and design of the study. BC and AD analysed the data. BC and NH interpreted the data. BC drafted the manuscript and all authors critically revised for significant intellectual content and insight. All authors had full access to all of the data and can take responsibility for the integrity and accuracy of data analysis. Furthermore all authors gave final approval of the manuscript version for publication. BC and NH are responsible for the overall content as guarantors.

## FUNDING

This research was supported by the National Institute for Health Research (NIHR) Biomedical Research Centre at Guy's and St Thomas' NHS Foundation Trust and King's College London. The views expressed are those of the author(s) and not necessarily those of the NHS, the NIHR or the Department of Health. Additional support was received from the Lane Fox Respiratory Unit Patients Association.

## COMPETING INTERESTS

All authors have completed the Unified Competing Interest Form at [www.icmje.org/doi\\_disclosure.pdf](http://www.icmje.org/doi_disclosure.pdf) (available from the corresponding author) and declare:

1  
2  
3 no support from any organisation for the submitted work; no financial relationships with  
4  
5 any organisations that might have an interest in the submitted work in the previous three  
6  
7 years; no spouse, partner or children have any financial relationships that may be relevant  
8  
9 to the submitted work; and no other non-financial interests that may be relevant to the  
10  
11 submitted work.  
12  
13

#### 14 15 16 17 **ETHICAL APPROVAL**

18 Ethical approval was not required for this study.  
19  
20  
21  
22

#### 23 24 **DATA SHARING**

25 No additional data available.  
26  
27  
28  
29

#### 30 31 **COPYRIGHT FOR PUBLICATION**

32  
33 The Corresponding Author has the right to grant on behalf of all authors and does grant on  
34  
35 behalf of all authors, a worldwide licence to the Publishers and its licensees in perpetuity, in  
36  
37 all forms, formats and media (whether known now or created in the future), to i) publish,  
38  
39 reproduce, distribute, display and store the Contribution, ii) translate the Contribution into  
40  
41 other languages, create adaptations, reprints, include within collections and create  
42  
43 summaries, extracts and/or, abstracts of the Contribution, iii) create any other derivative  
44  
45 work(s) based on the Contribution, iv) to exploit all subsidiary rights in the Contribution, v)  
46  
47 the inclusion of electronic links from the Contribution to third party material where-ever it  
48  
49 may be located; and, vi) licence any third party to do any or all of the above.  
50  
51  
52  
53  
54  
55  
56  
57  
58  
59  
60

**What is already known on this topic**

Survivors of critical illness demonstrate impairment of physical function, psychological well-being, cognitive function and health-related quality of life that are recognised clinical features of the post intensive care syndrome.

In the UK, rehabilitation following critical illness as a continuum that spans the whole patient pathway of recovery has been recommended in national guidance.

**What this study adds**

Limited implementation of NICE CG83 is evident across the UK in terms of clinical follow-up and rehabilitation programmes.

Establishing robust evidence to support national guidelines will maximise implementation to ensure clinical and cost-effective patient care is delivered.

## References

1. Cheung A, Tansey C, Tomlinson G, et al. Two-Year Outcomes, Health Care Use, and Costs of Survivors of Acute Respiratory Distress Syndrome. *Am J Resp Crit Care Med* 2006;**174**(5):538-44 doi: 10.1164/rccm.200505-693OC[published Online First: Epub Date]].
2. Herridge MS, Tansey CM, Matté A, et al. Functional Disability 5 Years after Acute Respiratory Distress Syndrome. *N. Engl. J. Med.* 2011;**364**(14):1293-304 doi: doi:10.1056/NEJMoa1011802[published Online First: Epub Date]].
3. Hopkins RO, Weaver LK, Collingridge D, et al. Two-Year Cognitive, Emotional, and Quality-of-Life Outcomes in Acute Respiratory Distress Syndrome. *Am. J. Respir. Crit. Care Med.* 2005;**171**(4):340-47 doi: 10.1164/rccm.200406-763OC[published Online First: Epub Date]].
4. Needham DM, Dinglas VD, Morris PE, et al. Physical and Cognitive Performance of Patients with Acute Lung Injury 1 Year after Initial Trophic versus Full Enteral Feeding. EDEN Trial Follow-up. *Am. J. Respir. Crit. Care Med.* 2013;**188**(5):567-76 doi: 10.1164/rccm.201304-0651OC[published Online First: Epub Date]].
5. Needham DM, Davidson J, Cohen H, et al. Improving long-term outcomes after discharge from intensive care unit: Report from a stakeholders' conference. *Crit. Care Med.* 2012;**40**(2):502-09
6. Iwashyna TJ. Survivorship will be the defining challenge of critical care in the 21st century. *Ann. Intern. Med.* 2010;**153**(3):204-5 doi: 153/3/204 [pii] 10.1059/0003-4819-153-3-201008030-00013[published Online First: Epub Date]].
7. Camporota L, Hart N. Lung protective ventilation. *BMJ* 2012;**344**:e2491 doi: 10.1136/bmj.e2491[published Online First: Epub Date]].

- 1  
2  
3 8. NICE. *Rehabilitation after critical illness. NICE Clinical Guideline 83*: National Institute for  
4  
5 Health and Clinical Excellence, London, UK, 2009.  
6
- 7  
8 9. Connolly B, Denehy L, Brett S, et al. Exercise rehabilitation following hospital discharge in  
9  
10 survivors of critical illness: an integrative review. *Critical Care* 2012;**16**(3):R226  
11
- 12  
13 10. Griffiths J, Hatch R, Bishop J, et al. An exploration of social and economic outcome and  
14  
15 associated health-related quality of life after critical illness in general intensive care  
16  
17 unit survivors: a 12-month follow-up study. *Critical Care* 2013;**17**(3):R100  
18
- 19  
20 11. NHS Right Care Atlas of Variation. Accessed 13/11/13.; Available at  
21  
22 <http://www.rightcare.nhs.uk/index.php/nhs-atlas/>  
23
- 24  
25 12. Jones S, Green S, Clark A, et al. Pulmonary rehabilitation following hospitalisation for  
26  
27 acute exacerbation of COPD: referrals, uptake and adherence. *Thorax* 2013;doi:  
28  
29 **10.1136/thoraxjnl-2013-204227**  
30
- 31  
32 13. Steier J, Martin A, Harris J, et al. Predicted relative prevalence estimates for obstructive  
33  
34 sleep apnoea and the associated healthcare provision across the UK. *Thorax* 2013  
35  
36 doi: 10.1136/thoraxjnl-2013-203887[published Online First: Epub Date] | .  
37
- 38  
39 14. Griffiths JA, Barber VS, Cuthbertson BH, et al. A national survey of intensive care follow-  
40  
41 up clinics. *Anaesthesia* 2006;**61**(10):950-55 doi: 10.1111/j.1365-  
42  
43 2044.2006.04792.x[published Online First: Epub Date] | .  
44
- 45  
46 15. Hodgin KE, Nordon-Craft A, McFann KK, et al. Physical therapy utilization in intensive  
47  
48 care units: Results from a national survey. *Crit. Care Med.* 2009;**37**(2):561-68  
49
- 50  
51 16. Lewis M. Intensive Care Unit Rehabilitation within the United Kingdom: Review.  
52  
53 *Physiotherapy* 2003;**89**(9):531-38  
54
- 55  
56 17. Skinner EH, Berney S, Warrillow S, et al. Rehabilitation and exercise prescription in  
57  
58 Australian intensive care units. *Physiotherapy* 2008;**94**(3):220-29  
59  
60

- 1  
2  
3 18. Appleton R, MacKinnon M, Booth M, et al. Rehabilitation within Scottish intensive care  
4  
5 units: a national survey. *Journal of the Intensive Care Society* 2011;**12**(3):221-27  
6  
7  
8 19. Berry A, Cutler L, Himsworth A. National survey of rehabilitation after critical illness.  
9  
10 *Journal of the Intensive Care Society* 2013;**14**(4):334-39  
11  
12 20. Department of Health. *Critical Care Outreach 2003: Progress in Developing Services*.  
13  
14 Department of Health and Modernisation Agency. 2003  
15  
16  
17 21. Battle C. A randomised controlled trial examining the effect of a six week supervised  
18  
19 exercise programme on patient fitness and hospital related anxiety and depression  
20  
21 following an intensive care length of stay of greater than 48 hours.  
22  
23 ISRCTN11853373 2011:available at [www.controlled-trials.com/isrctn/pf/11853373](http://www.controlled-trials.com/isrctn/pf/11853373)  
24  
25  
26 22. Griffiths R. Rehabilitating Muscle After Intensive Care (REMAIC) NCT01063738  
27  
28 2010:available at [www.controlled-trials.gov/ct2/show/record/NCT01063738](http://www.controlled-trials.gov/ct2/show/record/NCT01063738)  
29  
30  
31 23. O'Neill B. Exercise After Intensive Care Unit: a Randomised Controlled Trial (REVIVE)  
32  
33 NCT01463579 2011:available at [www.clinicaltrials.gov/ct2/show/NCT01463579](http://www.clinicaltrials.gov/ct2/show/NCT01463579)  
34  
35  
36 24. Battle C, James K, Temblett P, et al. Early results of a 6-week exercise programme in  
37  
38 post-ICU patients. *Critical Care* 2013;**17**(Suppl 2):P541  
39  
40  
41 25. Medical Research Council: Developing and evaluating complex interventions: new  
42  
43 guidance. Available at  
44  
45 <http://www.mrc.ac.uk/Utilities/Documentrecord/index.htm?d=MRC004871>; **Accessed**  
46  
47 **26th October 2013**  
48  
49  
50 26. Herridge M. The challenge of designing a post-critical illness rehabilitation intervention.  
51  
52 *Critical Care* 2011;**15**(5):1002  
53  
54  
55  
56  
57  
58  
59  
60



- 1  
2  
3 27. Connolly B, Jones G, Curtis A, et al. Clinical predictive value of manual muscle strength  
4  
5 testing during critical illness: an observational cohort study. *Critical Care*  
6  
7 2013;**17**(5):R229  
8  
9
- 10 28. Puthuchery ZA, Rawal J, McPhail M, et al. Acute skeletal muscle wasting in critical  
11  
12 illness. *JAMA* 2013;**310**(15):1591-600 doi: 10.1001/jama.2013.278481[published  
13  
14 Online First: Epub Date]].  
15  
16
- 17 29. Spruit MA, Singh SJ, Garvey C, et al. An Official American Thoracic Society/European  
18  
19 Respiratory Society Statement: Key Concepts and Advances in Pulmonary  
20  
21 Rehabilitation. *Am. J. Respir. Crit. Care Med.* 2013;**188**(8):e13-e64 doi:  
22  
23 10.1164/rccm.201309-1634ST[published Online First: Epub Date]].  
24  
25
- 26 30. Department of Health. *Comprehensive Critical Care: A Review of Adult Critical Care*  
27  
28 *Services*. London. 2000.  
29  
30
- 31 31. Prinjha S, Field K, Rowan K. What patients think about ICU follow-up services: a  
32  
33 qualitative study. *Critical Care* 2009;**13**:R46  
34  
35
- 36 32. Cuthbertson BH, Rattray J, Campbell MK, et al. The PRaCTICaL study of nurse led,  
37  
38 intensive care follow-up programmes for improving long term outcomes from critical  
39  
40 illness: a pragmatic randomised controlled trial. *BMJ* 2009;**339**:b3723 doi:  
41  
42 10.1136/bmj.b3723[published Online First: Epub Date]].  
43  
44
- 45 33. Grimshaw J, Russell I. Effect of clinical guidelines on medical practice: a systematic  
46  
47 review of rigorous evaluations. *The Lancet* 1993;**342**:1317-22  
48  
49
- 50 34. McKinlay J, Link C, Feund K, et al. Sources of Variation in Physician Adherence with  
51  
52 Clinical Guidelines: Results from a Factorial Experiment. *J. Gen. Intern. Med.*  
53  
54 2007;**22**(3):289-06  
55  
56  
57  
58  
59  
60

- 1  
2  
3 35. Cabana MD, Rand CS, Powe NR, et al. Why don't physicians follow clinical practice  
4  
5 guidelines? A framework for improvement. JAMA 1999;**282**(15):1458-65 doi:  
6  
7 10.1001/jama.282.15.1458[published Online First: Epub Date]].  
8  
9  
10 36. Man WD-C, Polkey MI, Donaldson N, et al. Community pulmonary rehabilitation after  
11  
12 hospitalisation for acute exacerbations of chronic obstructive pulmonary disease:  
13  
14 randomised controlled study. BMJ 2004;**329**(7476):1209 doi:  
15  
16 10.1136/bmj.38258.662720.3A[published Online First: Epub Date]].  
17  
18  
19 37. NICE. *Chronic Obstructive Pulmonary Disease: Management of Chronic Obstructive*  
20  
21 *Pulmonary Disease in Adults in Primary and Secondary Care. NICE Clinical Guideline*  
22  
23 *CG101*: National Institute of Clinical Excellence, London, UK, 2010.  
24  
25  
26 38. Seymour JM, Moore L, Jolley CJ, et al. Outpatient pulmonary rehabilitation following  
27  
28 acute exacerbations of COPD. Thorax 2010;**65**(5):423-28 doi:  
29  
30 10.1136/thx.2009.124164[published Online First: Epub Date]].  
31  
32  
33 39. TA139 Continuous positive airway pressure for the treatment of obstructive sleep  
34  
35 apnoea/hypopnoea syndrome. National Institute of Health and Clinical Excellence.  
36  
37 Accessed 13/11/13.; **Available at [www.nice.org.uk/TA139](http://www.nice.org.uk/TA139)**  
38  
39  
40 40. Burkell J. The dilemma of survey nonresponse. Library & Information Science Research  
41  
42 2003;**25**:239-63  
43  
44  
45 41. Rubenfeld GD. Surveys: An Introduction. Respir. Care 2004;**49**(10):1181-85  
46  
47  
48 42. Portney L, Watkins M. *Foundations of Clinical Research: Applications to Practice*. Third  
49  
50 Edition ed: Pearson Education Inc, NJ, USA, 2009.  
51  
52  
53 43. Intensive Care Society Core Standards for Intensive Care Units. Intensive Care Society.  
54  
55 Accessed 13/11/13.; **Available at [http://www.ics.ac.uk/ics-homepage/guidelines-](http://www.ics.ac.uk/ics-homepage/guidelines-standards/)**  
56  
57 **standards/**  
58  
59  
60

- 1  
2  
3 44. Stenhammer C, Bokstrom P, Edlund B, et al. Using different approaches to conducting  
4  
5 postal questionnaires affected response rates and cost-efficiency. *J. Clin. Epidemiol.*  
6  
7 2011;**64**:1137-43  
8  
9  
10 45. Hocking J, Lim M, Read T, et al. Postal surveys of physicians gave superior response rates  
11  
12 over telephone interviews in a randomized trial. *J. Clin. Epidemiol.* 2006;**59**:521-24  
13  
14 46. Burns K, Duffett M, Kho M, et al. A guide for the design and conduct of self-administered  
15  
16 surveys of clinicians. *Can. Med. Assoc. J.* 2008;**179**(3):245-52  
17  
18 47. Dillman D. *Mail and internet surveys: the tailored design method.*: Hoboken, NJ: John  
19  
20 Wiley & Sons 2007.  
21  
22  
23 48. Connolly B, Thompson A, Moxham J, et al. Difficulties of Patient Recruitment to a Post  
24  
25 Critical Illness Rehabilitation Programme. *Am. J. Respir. Crit. Care Med.*  
26  
27 2012;**185**:A3886  
28  
29  
30 49. Denehy L, Skinner E, Edbrooke L, et al. Exercise rehabilitation for patients with critical  
31  
32 illness: a randomized controlled trial with 12 months of follow-up. *Critical Care*  
33  
34 2013;**17**(4):R156  
35  
36  
37  
38  
39  
40  
41  
42  
43  
44

#### FIGURE LEGENDS

45  
46  
47  
48  
49  
50 **Figure 1.** Flow-chart of survey distribution stages, response rates and promotional activities

51  
52 *Abbreviations: iCSP = interactive Chartered Society of Physiotherapy. ACPRC = Association of Chartered*  
53 *Physiotherapists in Respiratory Care.*  
54  
55  
56  
57  
58  
59  
60

1  
2  
3 **A UK Survey of Rehabilitation Following Critical Illness: Implementation of NICE Clinical**  
4 **Guidance 83 (CG83) Following Hospital Discharge**  
5  
6  
7  
8  
9

10 **B Connolly<sup>1, 2, 3</sup> Clinical Research Fellow, A Douiri<sup>4</sup> Lecturer in Medical Statistics, J Steier<sup>3</sup>**  
11 **Consultant in Sleep and Respiratory Medicine, J Moxham<sup>1</sup> Professor of Respiratory**  
12 **Medicine, L Denehy<sup>5</sup> Professor of Physiotherapy, N Hart<sup>1, 2, 3</sup> Consultant in Respiratory and**  
13 **Critical Care Medicine**  
14  
15  
16  
17  
18  
19  
20

21 <sup>1</sup>Department of Asthma, Allergy & Respiratory Science

22 Division of Asthma, Allergy and Lung Biology, King's College London

23  
24  
25  
26  
27 5<sup>th</sup> Floor Tower Wing, Guy's Hospital

28  
29 London, SE1 9RT, UK

30  
31 <sup>2</sup>Guy's & St Thomas' NHS Foundation Trust and King's College London

32  
33 National Institute of Health Research Biomedical Research Centre,

34  
35  
36 16<sup>th</sup> Floor Tower Wing, Guy's Hospital

37  
38 London, SE1 9RT, UK

39  
40  
41 <sup>3</sup>Lane Fox Clinical Respiratory Physiology Research Unit

42  
43 St.Thomas' Hospital, Guy's & St.Thomas' NHS Foundation Trust

44  
45 Westminster Bridge Road,

46  
47 London, SE1 7EH, UK

48  
49  
50 <sup>4</sup>Department of Public Health Sciences

51  
52 King's College London

53  
54 5<sup>th</sup> Floor, Capital House

55  
56  
57 Guy's Hospital  
58  
59  
60

1  
2  
3 London, SE1 3QD, UK  
4

5<sup>5</sup>Department of Physiotherapy  
6

7 School of Health Sciences, University of Melbourne  
8

9  
10 Parkville, 3010, Melbourne, Australia  
11

12  
13  
14  
15 **Corresponding author**  
16

17 Bronwen Connolly  
18

19 Research Office, Lane Fox Respiratory Unit  
20

21 Ground Floor, South Wing  
22

23 St.Thomas' Hospital, Guy's & St.Thomas' NHS Foundation Trust  
24

25 Westminster Bridge Road  
26

27  
28 London, SE1 7EH, UK  
29

30  
31 Tel: +44 20 7188 8070  
32

33  
34 Email: [bronwen.connolly@nhs.net](mailto:bronwen.connolly@nhs.net)  
35

36  
37  
38 **Word Count** 4075  
39

40  
41  
42  
43 **Key words**  
44

45 Critical illness, rehabilitation, guidelines, implementation, survey  
46  
47  
48  
49  
50  
51  
52  
53  
54  
55  
56  
57  
58  
59  
60

**ABSTRACT****Objective**

To determine the implementation of **National Institute for Health and Care Excellence** guidance (NICE CG83) for post hospital discharge critical illness follow-up and rehabilitation programmes.

**Design**

Closed-question postal survey.

**Setting**

Adult intensive care units (ICU), across the UK, identified from national databases of organisations. Specialist-only and private ICUs were not included.

**Participants**

Senior respiratory critical care physiotherapy clinicians.

**Results**

A representative sample of 182 surveys were returned from 240 distributed (75.8% (95%CI 70.4-81.2)). Only 48 organisations (27.3% (95%CI 20.7 to 33.9)) offered a follow-up service 2-3 months following hospital discharge, the majority (n=39, 84.8%) in clinic format. Twelve organisations reported post hospital discharge rehabilitation programmes (6.8% (95%CI 3.1 to 10.5)), albeit only ten of these operated on a regular basis. Lack of funding was reported as both the most frequent (n=149/164, 90.0%) and main barrier (n=99/156, 63.5%) to providing services. Insufficient resources (n=71/164, 43.3%) and lack of priority by the clinical management team (n=66/164, 40.2%) were also highly cited barriers to service delivery.

**Conclusion**

1  
2  
3 NICE CG83 has been successful in profiling the importance of rehabilitation for survivors of  
4  
5 critical illness. However, four years following publication of CG83 there has been limited  
6  
7 development of this clinical service across the UK. Strategies to support delivery of such  
8  
9 quality improvement programmes are urgently required to enhance patient care.  
10  
11

#### 12 13 14 **Word Count**

15  
16  
17 216  
18  
19

#### 20 21 22 **Article summary**

##### 23 24 **Strengths and limitations of this study**

- 25  
26 • This is the largest, and most comprehensive survey conducted across the UK of post  
27  
28 hospital discharge follow-up and rehabilitation for survivors of critical illness  
29  
30
- 31  
32 • Data from this survey indicate a low reported prevalence of available services, with  
33  
34 barriers to service implementation reported by clinicians examined in detail  
35  
36
- 37  
38 • This survey was profession-specific, directed only to physiotherapy clinicians rather  
39  
40 than multiple members of the interdisciplinary team  
41  
42
- 43  
44 • Specialist-only and private organisations were excluded, which may have provided  
45  
46 additional, potentially beneficial data  
47  
48  
49  
50  
51  
52  
53  
54  
55  
56  
57  
58  
59  
60

## INTRODUCTION

Intensive care unit (ICU) admission with critical illness can have catastrophic and often long-term consequences for survivors. Physical and psychological impairments including reduced exercise capacity and health-related quality of life can persist for many years following hospital discharge [1-4]. These features are now referred to as the 'post intensive care syndrome' [5]. In recent years the importance of survivorship, or quality of survival, has been increasingly recognised [6], and the role of rehabilitation interventions to facilitate the recovery pathway of patients have become a major focus for the clinician [7].

In the UK, the **National Institute of Health and Care Excellence** (NICE) in 2009 published clinical guideline 83 (CG83) focussed on 'Rehabilitation After Critical Illness' ([available at http://publications.nice.org.uk/rehabilitation-after-critical-illness-cg83](http://publications.nice.org.uk/rehabilitation-after-critical-illness-cg83)). This profiled the importance of this area of clinical practice aiming to improve the standards of care and previously unmet clinical needs of this patient group. NICE CG83 advocated a continuum of multidisciplinary rehabilitation along the recovery pathway from within the ICU to the ward and following hospital discharge, **albeit these recommendations were largely based on expert consensus due to the lack of published evidence [8]. Specifically, at the point of hospital discharge, it is recommended that patients are referred to appropriate rehabilitation services if ongoing needs are identified. At 2-3 months following hospital discharge, a review and functional reassessment of the patient should be undertaken to determine the extent of recovery and additional rehabilitation input in the event of a slower than anticipated recovery or identification of new physical and/or psychological morbidity [8].**



1  
2  
3 Despite the intentions, widespread clinical implementation of these guidelines has been  
4  
5 challenged by the limited evidence underpinning the recommendations, as well as sparse  
6  
7 detail provided to characterise the optimum type, intensity, frequency and duration of  
8  
9 exercise therapy and rehabilitation interventions [9]. Furthermore, critical care survivors  
10  
11 experience inadequate and disjointed multidisciplinary care following hospital discharge  
12  
13 with inconsistent service provision, which can be strongly influenced by local resources and  
14  
15 geographical location [10].  
16  
17  
18  
19

20  
21 Failure to implement national guidelines or respond to published evidence is not  
22  
23 uncommon. Disparity between the prevalence of conditions such as chronic  
24  
25 cardiorespiratory disease, diabetes mellitus and sleep-related disorders, and availability of  
26  
27 recommended services for their management, is evident across the UK [11-13]. Previous  
28  
29 surveys relating to provision of critical care rehabilitation have focussed on ICU follow-up  
30  
31 [14] or physiotherapy practice within the ICU [15-17]. Two recent surveys reported on NICE  
32  
33 CG83, but these were limited in content and detail [18 19]. The aim of the current study  
34  
35 was to comprehensively determine, across the UK, implementation of NICE CG83 during the  
36  
37 post hospital discharge period with detailed characterisation of available follow-up and  
38  
39 rehabilitation services, and including establishing barriers to service provision.  
40  
41  
42  
43  
44  
45  
46  
47

## 48 **METHODS**

49  
50 Details for all adult ICUs across the UK (England, Scotland, Wales and Northern Ireland) were  
51  
52 obtained via two central registries; the Intensive Care National Audit and Research Centre  
53  
54 (ICNARC) and the Scottish Intensive Care Society Audit Group (SICSAG). A total of 240  
55  
56  
57  
58  
59  
60

1  
2  
3 organisations were identified (85 university teaching (UT) hospitals and 155 district general  
4  
5 (DG) hospitals). Specialist-only and private ICUs were excluded were from survey.  
6  
7

8  
9  
10 The authors designed a predominantly closed-question survey (Web file 1) to evaluate  
11  
12 clinical practice regarding follow-up and rehabilitation services for survivors of critical illness  
13  
14 post hospital discharge. Demographic details were requested regarding number, type and  
15  
16 bed-capacity of critical care areas at each organisation. In addition, detail of service  
17  
18 provision including follow-up, content, delivery and evaluation of rehabilitation programmes  
19  
20 was requested, and barriers to offering services were sought if none were currently in  
21  
22 operation. The majority of questions allowed respondents to select from multiple options  
23  
24 with space available for free-text comments throughout. These options were not ranked,  
25  
26 nor were respondents asked to mark their response in terms of perceived importance or  
27  
28 grading, with the exception of asking respondents to detail the main limiting barrier to  
29  
30 service availability. The survey was piloted using three senior physiotherapy clinicians and  
31  
32 clinical-academics (ICU clinical experience ranging 7-14 years) at two tertiary referral  
33  
34 university teaching hospitals in London, UK. Constructive critique of survey design, content,  
35  
36 structure, user-acceptability and time for completion was requested, following which  
37  
38 further refinement was undertaken.  
39  
40  
41  
42  
43  
44  
45  
46  
47

48 In March 2013, the survey and a covering letter of invitation to participate were distributed  
49  
50 by post to the senior physiotherapist for critical care at each of the organisations with an  
51  
52 included ICU. Stamped, self-addressed envelopes (SAEs) were enclosed for return of  
53  
54 completed surveys. Surveys were coded to identify responses. Throughout the period of  
55  
56 survey distribution a variety of strategies were employed to assist with survey promotion  
57  
58  
59  
60

1  
2  
3 and enhance rates of completion and return. Six weeks following initial survey distribution,  
4  
5 a reminder letter was sent by post to non-responders with a second copy of the survey and  
6  
7 further SAEs. A further six weeks later, telephone calls were made to remaining non-  
8  
9 responders. Direct contact was attempted with the senior critical care physiotherapist to  
10  
11 determine willingness to participate, who were offered the choice of telephone or email  
12  
13 completion of the survey. Respondents were also contacted via email or telephone if there  
14  
15 were missing data.  
16  
17  
18  
19

## 20 21 22 **Data Handling**

23  
24 In line with guidance produced by the UK National Research Ethics Service (available at  
25  
26 <http://www.nres.nhs.uk/>) the project was deemed an evaluation of service provision, and  
27  
28 therefore ethical approval was not required. Completion and return of the survey was  
29  
30 considered indicative of willingness to participate in the survey and implied consent. All  
31  
32 data were stored in standard spreadsheets, transcribed from hard copies of returned  
33  
34 surveys. Due to the nature of the study and data collected, descriptive statistics were used  
35  
36 to analyse quantitative responses including number, percentage and 95% confidence  
37  
38 intervals where appropriate, and additional qualitative review of free-text comments made.  
39  
40 A response rate of 65% rate was considered *a priori* to provide a representative sample.  
41  
42  
43  
44  
45  
46  
47

## 48 **RESULTS**

### 49 **Responding institutions**

50  
51 One hundred and eighty-two of the 240 distributed surveys were returned, indicating an  
52  
53 overall response rate of 75.8% (95%CI 70.4 to 81.2) (Figure 1). Specifically, nearly three-  
54  
55 quarters of all surveys distributed to both university teaching (UT) and district general (DG)  
56  
57  
58  
59  
60

1  
2  
3 hospitals were returned (66/85, 75% and 115/155, 74.2% respectively) indicating that the  
4  
5 groups of respondents were a representative sample of the original cohort of organisations.  
6

7  
8 One survey was returned blank with the respondent indicating that they lacked sufficient  
9  
10 time for completion. Demographic data for the hospitals surveyed are reported in *Table 1*.  
11  
12 The majority were district general (DG) hospitals with ICUs and high dependency units  
13  
14 (HDUs) managing mixed general medical and surgical patient casemixes. A large number of  
15  
16 responses reported 'combination' units accepting both Level 3 and 2 patients (*Table 2*).  
17  
18  
19

20  
21  
22 Five respondents reported that available rehabilitation programmes at their organisations  
23  
24 were the direct result of active research studies (*Figure E1, Web only file 2*). These  
25  
26 responses were excluded as the aim of the survey was to characterise current clinical  
27  
28 practice rather than research activity. These five respondents completed the section asking  
29  
30 for barriers to offering a clinical service had the research study not been implemented.  
31  
32  
33  
34  
35  
36  
37  
38  
39  
40  
41  
42  
43  
44  
45  
46  
47  
48  
49  
50  
51  
52  
53  
54  
55  
56  
57  
58  
59  
60

**Table 1.** Demographics of **respondent** organisations

| Characteristic                                                           | n (%)      |
|--------------------------------------------------------------------------|------------|
| Response rate according to UK country                                    |            |
| England                                                                  | 145 (75.1) |
| Scotland                                                                 | 20 (87.0)  |
| Wales                                                                    | 12 (80.0)  |
| Northern Ireland                                                         | 5 (55.6)   |
| Type of hospital                                                         |            |
| University teaching                                                      | 66 (36.5)  |
| District general                                                         | 115 (63.5) |
| Total number of Critical Care Units*                                     |            |
| Level 3 (ICU)                                                            | 112        |
| Level 2 (HDU)                                                            | 170        |
| Combination Level 3 and 2 units                                          | 98         |
| Total number of Critical Care Beds*                                      |            |
| Level 3 (ICU)                                                            | 1007       |
| Level 2 (HDU)                                                            | 1090       |
| Combination Level 3 and 2 units                                          | 1354       |
| Frequency of reported types of patients admitted to Critical Care Unit*# |            |
| General                                                                  | 230        |
| Surgical                                                                 | 52         |
| Medical                                                                  | 38         |
| Cardiac/Cardiology/Cardiothoracic                                        | 35         |
| Neurological                                                             | 22         |
| Respiratory                                                              | 17         |
| Trauma                                                                   | 14         |
| Renal                                                                    | 5          |
| Burns                                                                    | 4          |
| Liver                                                                    | 4          |
| ENT                                                                      | 3          |
| Other~                                                                   | 10         |

n=181 responses (except for response rate according to country, n=192 responses). Critical care units and bed numbers refers to the total number within respondent organisations overall e.g. one organisation may have multiple critical care areas. \*n=2 non-responses. #Data presented indicates frequency of reported occurrence of type. Multiple responses could be given. ~Other e.g. haematology, infectious disease, maxillo-facial, vascular.

Abbreviations: ICU = intensive care unit. HDU = high dependency unit. ENT = ear, nose, throat.

**Table 2.** Classifications of level of clinical care provided to patients

| Level | Classification                                                                                                                                                                                                              |
|-------|-----------------------------------------------------------------------------------------------------------------------------------------------------------------------------------------------------------------------------|
| 0     | Patients whose needs can be met through normal ward care in an acute hospital.                                                                                                                                              |
| 1     | Patients at risk of their condition deteriorating, or those recently located from higher levels of care, whose needs can be met on an acute ward with additional advice and support from the critical care team.            |
| 2     | Patients requiring more detailed observation or intervention including support for a single failing organ system or post-operative care and those 'stepping down' from higher levels of care.                               |
| 3     | Patients requiring advanced respiratory support alone or basic respiratory support together with support of at least two organ systems. This level includes all complex patients requiring support for multi-organ failure. |

From Comprehensive Critical Care, DH, 2000 [20]

### Post hospital discharge follow-up clinical services

Forty-eight organisations (27.3%, 95%CI (20.7 to 33.9)) reported availability of follow-up of post critical illness patients at 2-3months following hospital discharge (*Figure E1, Web only file 2*). Thirty-two (66.7%) of these were from DG hospitals and 16 (33.3%) from university teaching (UT) hospitals. Forty-five organisations offering follow-up were located in England, two in Scotland, one in Northern Ireland and none in Wales. Two respondents did not provide details of follow-up provision. Of the remaining responses (n=46), ICU follow-up clinics were the most frequently reported form of follow-up (n=39, 84.8%) (*Table 3*). Eleven respondents reported more than one form of follow-up was in place.

**Table 3.** Follow-up services for critical care survivors post hospital discharge

| <b>Form of follow-up</b>             | <b>n (%)</b> |
|--------------------------------------|--------------|
| ICU follow-up clinic                 | 39 (84.8)    |
| Rehabilitation class                 | 10 (21.7)    |
| Other                                | 6 (13.0)     |
| Did not specify                      | 2 (4.3)      |
| Postal survey                        | 1 (2.2)      |
| Telephone call                       | 1 (2.2)      |
| Medical outpatient appointment       | 0 (0)        |
| <b>Multidisciplinary team member</b> | <b>n (%)</b> |
| Physiotherapist                      | 43 (89.6)    |
| Critical Care nurse                  | 42 (87.5)    |
| Critical Care doctor                 | 31 (64.6)    |
| Psychologist                         | 10 (20.8)    |
| Dietician                            | 2 (4.2)      |
| Occupational therapist               | 2 (4.2)      |
| <b>Content of follow-up</b>          | <b>n (%)</b> |
| HRQL                                 | 40 (83.3)    |
| Psychological status                 | 39 (81.3)    |
| Medical status                       | 34 (70.8)    |
| Nursing-related issues               | 29 (60.4)    |
| Exercise capacity                    | 28 (58.3)    |
| Diet/nutrition                       | 24 (50.0)    |
| Other                                | 9 (18.8)     |

For follow-up, n=frequency of reported occurrence out of 46 responses. Multiple forms of follow-up could be indicated. Other included informal coffee morning, patient support group, physiotherapy outreach, ad hoc appointments with ICU nursing staff. For multidisciplinary team members, n=frequency of reported occurrence out of 48 responses. Multiple team members could be listed. For follow-up content, n=frequency of reported occurrence out of 48 responses. Multiple content could be listed. Other included 'problem-based' or 'patient-dependent' discussion

*Abbreviation: ICU = intensive care unit. HRQL = health-related quality of life.*

1  
2  
3 Forty-three (89.6%) respondents reported that physiotherapists were part of the  
4  
5 multidisciplinary team (MDT) involved in follow-up of post critical illness patients. However,  
6  
7 just under one-third of these, n= 13 (30.2%), reported that this was on an *ad hoc* referral  
8  
9 basis only. Other MDT members involved in follow-up are detailed in *Table 3*. In five cases  
10  
11 access to critical care doctors, occupational therapists, psychologists or dieticians was also  
12  
13 reported to be on a referral basis only. Critical care nurses were the most consistently  
14  
15 featured MDT members and occupational therapists and dieticians were rarely involved in  
16  
17 follow-up. The scale of MDT involvement ranged from one member (10.4%) to five  
18  
19 members (2.0%), with three being the most common (43.8%). No other healthcare  
20  
21 professionals, other than those listed, were documented to be part of the MDT.  
22  
23  
24  
25  
26  
27  
28

29 Nearly half of those with follow-up services included a functional reassessment for  
30  
31 comparison with assessment conducted at the time of hospital discharge (n = 20, 42.6%).  
32  
33 *Table 3* details other aspects of follow-up assessments; health-related quality of life (n = 40,  
34  
35 83.3%) and psychological status (n= 39, 81.3%) were the most frequently reported items.  
36  
37 Exercise capacity and nursing-related issues were included in approximately half of cases.  
38  
39  
40  
41  
42

### 43 **Availability of post hospital discharge rehabilitation programmes**

44  
45 Twelve organisations reported a rehabilitation programme was available following hospital  
46  
47 discharge for post critical illness patients (6.8%, 95% CI (3.1 to 10.5)) (*Figure E1, Web only*  
48  
49 *file 2*). Two reported that their programme was only available on an *ad hoc* basis only. Of  
50  
51 the remaining ten programmes implemented on a regular basis, 4 (40%) were conducted at  
52  
53 UT hospitals and 6 (60%) at DG hospitals), and all based at organisations in England. All had  
54  
55  
56  
57  
58  
59  
60



1  
2  
3 also reported offering a follow-up service, with eight of these in the form of an ICU follow-  
4  
5 up clinic.  
6  
7

8  
9  
10 Senior ICU physiotherapists led all available rehabilitation programmes, with the exception  
11  
12 of one led by a rehabilitation physiotherapist. The majority (n=9) were hospital-based,  
13  
14 outpatient programmes, specific for post critical illness patients. Exercise was a component  
15  
16 of all programmes including cardiovascular, muscle strength, balance and functional  
17  
18 activities. Exercise prescription was usually based on clinician judgement, and on occasion  
19  
20 using results of physical assessment of walking capacity of function. Clinical and  
21  
22 physiological parameters were used to monitor exercise intensity during sessions. Less than  
23  
24 half of all programmes (n=4) included education sessions. Measures used to evaluate  
25  
26 effectiveness of these rehabilitation programmes varied greatly with exercise capacity and  
27  
28 health-related quality of life most commonly reported.  
29  
30  
31  
32  
33

34  
35  
36 Further detail on the leadership, format and structure, content and monitoring and  
37  
38 evaluation of available post hospital discharge rehabilitation programmes can be found in  
39  
40 Web only file 2.  
41  
42

#### 43 44 45 **Barriers to delivery of post hospital discharge rehabilitation programmes**

46  
47 Respondents were requested to report the barriers to delivery of post hospital discharge  
48  
49 rehabilitation programmes from a non-hierarchical list including clinical, pragmatic,  
50  
51 managerial and administrative options. From the reasons selected, respondents were also  
52  
53 requested to confirm the main reason. From a potential 171 responses, there were seven  
54  
55 non-responses to both parts of this question (n=164), and a further 8 non-responses to  
56  
57  
58  
59  
60

specifying the main barrier (n=156). 91% (n = 149) of respondents reported lack of funding as one barrier to offering a post hospital discharge rehabilitation programme, and 75% reported lack of staff (Table 4). Only 2.4% of respondents reported that a lack of evidence and less than 1% of respondents reported time constraints as barriers to implementing a post hospital discharge rehabilitation programme. 6% (10/164) of respondents reported only one barrier, 20% (33/164) reported two barriers and 73% (120/164) reported greater than two barriers.

**Table 4.** Barriers to post hospital discharge rehabilitation programmes for survivors of critical illness

| Barrier                                                      | Frequency reported overall, n (%) | Frequency reported as main barrier, n (%) |
|--------------------------------------------------------------|-----------------------------------|-------------------------------------------|
| Lack of funding                                              | 149 (90.9)                        | 99 (63.5)                                 |
| Lack of sufficient staff                                     | 128 (78.0)                        | 17 (10.9)                                 |
| Resources prioritised to other patient groups/clinical areas | 71 (43.3)                         | 4 (2.7)                                   |
| Not considered required service at managerial level          | 66 (40.2)                         | 22 (14.1)                                 |
| Lack of available space                                      | 50 (30.5)                         | 2 (1.3)                                   |
| Insufficient patient numbers to justify                      | 35 (21.3)                         | 11 (7.1)                                  |
| Extra-contractual (out-of-area) patient caseload             | 15 (9.1)                          | 0 (0.0)                                   |
| Lack of trained staff                                        | 13 (7.9)                          | 0 (0.0)                                   |
| No evidence                                                  | 4 (2.4)                           | 0 (0.0)                                   |
| Not sure what to include in a programme                      | 2 (1.2)                           | 0 (0.0)                                   |
| Other (time constraints)                                     | 1 (0.6)                           | 1 (0.6)                                   |

For frequency of reported barriers overall, n=164 responses. For frequency of reporting as main barrier, n=156 responses. (n=182 responses, excluding one blank response, ten non-applicable responses relating to rehabilitation programmes in regular operation, seven non-responses to both parts of this question, and a further eight non-responses to specifying the main barrier).

### Alternative rehabilitation programmes

57.3% (98/171) of respondents reported that in the absence of a specific post hospital discharge rehabilitation programme for survivors of critical illness at their organisation, patients were referred into alternative rehabilitation streams, including pulmonary rehabilitation (PR) (62/98, 63.3%) and cardiac rehabilitation (38/98, 38.8%) (e.g. those patients post cardiac surgery and post myocardial infarction) and various community-based services (59/98; 60.2%). Free-text comments from respondents regarding barriers to offering rehabilitation programmes and the use of alternative rehabilitation streams for ICU survivors following hospital discharge can be found in the Data Supplement (E3).

### DISCUSSION

These data from the first comprehensive UK survey highlight the limited implementation of NICE CG83 and the poor delivery across the UK of post hospital rehabilitation services for survivors of critical illness. Indeed, of one-hundred and eighty-two surveys returned, less than one-third of all institutions surveyed provided any form of follow-up for these patients. Of major clinical concern is that only 5% of respondents reported the provision of a regular rehabilitation programme for critical illness survivors, a major focus of CG83. A lack of funding was the most frequently reported and main barrier to service availability. Furthermore, lack of managerial support for this type of service and prioritisation of resource allocation to other clinical areas were reported as barriers by over 40% of the respondents. These data indicate that inadequate clinical infrastructure exists for hospitals and community teams to successfully adhere to NICE CG83. The limited impact of NICE guidance on clinical practice is not unique to critical care rehabilitation and is, rather

1  
2  
3 disappointingly, a theme observed in other areas of healthcare that have been subject to  
4  
5 the development of NICE guidelines.  
6  
7  
8  
9

### 10 **Implementation of NICE CG83 across the UK**

11  
12 The lack of implementation of NICE CG83 evident from these data could have reflected poor  
13  
14 motivation on the part of clinicians to actively engage in the delivery of recommendations.  
15

16  
17 However, the key barriers to service delivery were reported as lack of funding, limited  
18  
19 resources and infrastructure with reduced priority at managerial level. In the modern  
20

21  
22 National Health Service (NHS), such obstacles to the application of NICE CG83 are at either a  
23  
24 clinical commissioning or clinical operational level, or both, rather than at the level of the  
25

26  
27 clinicians. Interestingly, the paucity of data to support the effectiveness of post ICU  
28  
29 rehabilitation was not perceived as a barrier by the vast majority of clinicians, and highlights  
30

31  
32 the complexities in the management and clinical delivery of a critical care rehabilitation  
33  
34 service. A conflict between clinicians, managers and commissioners has developed as the  
35

36  
37 lack of high level clinical evidence supporting NICE CG83 provides a major challenge to the  
38  
39 funding of a critical care survivor rehabilitation service by both managers and  
40

41  
42 commissioners. *Of note, the survey identified five respondents who reported availability of*  
43  
44 *post hospital discharge rehabilitation services as part of existing research studies ([21-23],*

45  
46 *examining the effect of various exercise-based interventions delivered in outpatient settings*  
47  
48 *to post critical illness patients following hospital discharge. At present, only abstract data*

49  
50 *are available from one of these studies, that demonstrate a significant improvement in*  
51  
52 *exercise capacity and balance as a result of the intervention [24]. Further data from this,*

53  
54 *and other similar studies, will assist in establishing the evidence-base post critical illness*  
55  
56 *rehabilitation.*  
57  
58  
59  
60

### **Alternatives to post hospital discharge rehabilitation programmes**

Rehabilitation for survivors of critical illness is a complex intervention [25], that requires further translational work and clinical trials to provide the evidence [26-28]. Until these data are available, the unmet clinical need will remain evident and unaddressed. Referral into established rehabilitation programmes, such as cardiac and pulmonary rehabilitation, offers one potential resolution with over 50% of respondents reported the use of other rehabilitation programmes for the critical care survivors, and this may further be influenced by the designated speciality of the ward destination of patients following ICU discharge. Indeed the up-to-date guidelines for pulmonary rehabilitation [29], advocate individualised patient management and these interventions could be easily adapted for patients recovering from critical, albeit that additional referrals places an increased burden these services. However, whilst valuable resources, these programmes are disease-specific and may not fully address the range of impairments demonstrated by survivors of critical illness as part of 'post intensive care syndrome' [5].

### **The clinical usefulness of post ICU clinics**

Post-ICU clinics provided the majority of available follow-up services in the current survey. Profiled in the late 1990s and early 2000s following updating of the NHS agenda for critical care [20 30], these clinics have been reported by patients to play a valuable contribution to their physical, emotional and psychological recovery [31]. However, trial data have failed to demonstrate clinical effectiveness or cost benefit [32]. An alternative approach to the conduct and purpose of post ICU clinics would be to robustly monitor over time the trajectory of recovery of ICU survivors with onward referral into specific speciality care where identified as required. Wide variability in responses regarding post hospital discharge

1  
2  
3 rehabilitation programmes for ICU survivors severely limits any consensus on the optimum  
4  
5 approach for these services. The marked heterogeneity of the patient population makes it  
6  
7 increasingly likely that a bespoke, individualised approach, akin to the approach of  
8  
9 personalised medicine, may be more appropriate.  
10  
11

### 12 13 14 15 **Barriers to implementation of national guidelines**

16  
17 The implementation of, and adherence to, a clinical guideline can be inconsistent [33 34].  
18  
19 The limited detail in terms of the rehabilitation programme in the guideline *per se* as well as  
20  
21 local conditions such as staff infrastructure, organisation and resource were the main source  
22  
23 of restriction to implementation of NICE CG83 in the current survey [35]. This is the first  
24  
25 survey to investigate reasons behind failure to implement such a national guideline and  
26  
27 offer significant insight into the requirements necessary for successful clinical application of  
28  
29 recommendations designed to enhance patient care. Whilst the goals of NICE CG83 were  
30  
31 important and raised the profile of this area of clinical practice the influence will be short-  
32  
33 lived without further investment in support systems at operational and staffing level.  
34  
35 Disappointingly, this scenario appears to be mirrored in other common clinical conditions.  
36  
37 Although evidence supports the use of early pulmonary rehabilitation (PR) following acute  
38  
39 exacerbation of chronic obstructive pulmonary disease (AECOPD) to enhance exercise  
40  
41 capacity, health status and reduce hospital readmissions [29 36-38], recent data suggest  
42  
43 that only one-third of eligible patients are referred to early PR programmes and less than  
44  
45 10% of all hospital discharges for AECOPD complete early post-hospitalisation PR [12]. This  
46  
47 implementation failure is also observed following the NICE guidance on the management of  
48  
49 obstructive sleep apnoea [39] with a recent national mapping exercise highlighting a  
50  
51 significant mismatch between predictive healthcare requirements, based on prevalence of  
52  
53  
54  
55  
56  
57  
58  
59  
60

1  
2  
3 known associated risk factors, and delivery of related services [13]. Furthermore, the 2012  
4  
5 NHS Atlas of Variation in Healthcare for People with Diabetes [11] revealed substantial  
6  
7 numbers of patients were not in receipt of the basic clinical standards of care. The barriers  
8  
9 to the implementation of these guidelines are specific to each clinical area, but there are  
10  
11 generic barriers, such as lack of adequate funding and resource, that need to be considered  
12  
13 carefully. However, it must be highlighted that robust clinical trial and other data are  
14  
15 required to support a guideline if it is to be commissioned within the NHS and delivering a  
16  
17 guideline prematurely will lead to implementation failure, despite major enthusiasm by  
18  
19 clinicians.  
20  
21  
22  
23  
24  
25  
26

### 27 **Critique of the method**

28  
29 A major strength of this survey is the employment of a variety of strategies to optimise  
30  
31 completion, resulting in a 76% response rate. Nonetheless, survey non-response is a  
32  
33 challenge to the robustness of the current findings, introducing bias through the potential  
34  
35 for non-responders to differ significantly from responders [40 41]. Despite this, one must  
36  
37 consider this as a most satisfactory return indicating external validity [41 42]. **Furthermore,**  
38  
39 **the sample of respondents was representative of the original cohort.** The high response  
40  
41 rate may represent the clinical concern of the respondents in terms of poor implementation  
42  
43 of NICE CG83, in particular, as the core standards for care of the critically ill patient have  
44  
45 been recently published highlighting rehabilitation as an important core clinical care  
46  
47 standard [43].  
48  
49  
50  
51  
52  
53  
54

55 Postal questionnaires can be preferable for conducting surveys of large populations over a  
56  
57 wide geographical range, offering a cost-efficient as well as time-efficient format with often  
58  
59  
60

1  
2  
3 improved response rates in comparison to alternative routes such as telephone interview or  
4  
5 email [44]. Furthermore, an email or internet-based platform would have been restricted in  
6  
7 the current study due to lack of available electronic contact details for **named critical care**  
8  
9 **physiotherapy** clinicians, and where postal distribution offered a more standardised  
10  
11 approach for monitoring and identifying respondents. Nonetheless, we acknowledge that in  
12  
13 the current technology climate, many respondents may have preferred this option for  
14  
15 survey participation. We utilised both email and telephone contact at later stages of survey  
16  
17 distribution as a more feasible and less cost-prohibitive means to target previous non-  
18  
19 responders with good effect. Despite encountering some difficulty with locating designated  
20  
21 senior clinicians [45], this resulted in a relatively high conversion rate of 36% of non-  
22  
23 responders. **However, we recognise that it was not possible to control who was responsible**  
24  
25 **for actual completion of the postal surveys returned, and that this may have been by more**  
26  
27 **junior staff depending on local staffing arrangements, perceived importance and time**  
28  
29 **constraints of senior clinicians. However, we also specified in the accompanying cover letter**  
30  
31 **that respondents be in a position to comment on the content of the survey, and therefore**  
32  
33 **this may have been appropriate for different personnel.**  
34  
35  
36  
37  
38  
39  
40  
41  
42

43 The current survey took advantage of a range of design and formatting strategies to  
44  
45 enhance completion, additionally including a personalised cover letter and stamped  
46  
47 addressed envelopes [41 42 46]. Survey review was undertaken during piloting with three  
48  
49 senior **physiotherapy** clinical-academics, and we aimed to minimise additional burden to  
50  
51 potential respondents by not utilising a larger sample at this stage. Furthermore, we  
52  
53 adopted an approach to survey distribution in keeping with that suggested to minimise non-  
54  
55 response [47]. However, the current survey lacked sufficient demographic or other data  
56  
57  
58  
59  
60



1  
2  
3 regarding non-responders to attempt comparison between the two groups [40 41],  
4  
5 although 95% confidence intervals are narrow supporting the respondents as representative  
6  
7 sample of the whole respondent population.  
8  
9

10  
11  
12 We identified ICUs for inclusion based on data provided by two national registries (ICNARC  
13 and SICSAG). Whilst specialist-only and private institutions were excluded, assuming that  
14 rehabilitation services offered to these patient cohorts may be influenced by disease-  
15 specific or institutional status-related factors, we acknowledge that future survey data  
16 acquired from these organisations may add further benefit to characterising service  
17 provision. We adopted a more rigorous approach to data acquisition than previous similar  
18 surveys that were country-specific [18] or excluded key regions [19], albeit these authors  
19 examined NICE CG83 implementation across the patient pathway and results observed at  
20 the post hospital discharge stage mirrored those of the current study.  
21  
22  
23  
24  
25  
26  
27  
28  
29  
30  
31  
32  
33  
34  
35

36 The current study focussed on post hospital discharge management as it is at this stage that  
37 patients may be more likely to experience insufficient input for reasons such as lack of  
38 available services, repatriation back to other geographical regions or follow-up under non-  
39 ICU teams [48]. In contrast to previous surveys, we examined barriers to service availability  
40 in detail to gain further insight regarding this. Furthermore, rehabilitation for ICU survivors  
41 following hospital discharge has been the focus of recent research interest with randomised  
42 controlled trial data now available [49]. The current survey could be critiqued for being  
43 discipline-specific. However, it was considered that senior critical care physiotherapy  
44 clinicians would be well-informed as key members of the multi-disciplinary team involved in  
45  
46  
47  
48  
49  
50  
51  
52  
53  
54  
55  
56  
57  
58  
59  
60

1  
2  
3 management of ICU survivors, to comment on follow-up and rehabilitation service provision  
4  
5 at their institutions.  
6  
7  
8  
9

## 10 **CONCLUSION**

11  
12 These data from this first comprehensive UK survey of post hospital discharge rehabilitation  
13 programmes for critical illness survivors have demonstrated a low reported prevalence and,  
14 more importantly, this survey has showed a failure to implement NICE CG83. Lack of clinical  
15 prioritisation and funding was reported by the clinicians as the major cause for the failure to  
16 implement the guideline, but the paucity of evidence that supported the guideline must be  
17 regarded as a major contributor to the limited engagement between clinicians, managers  
18 and commissioners to deliver NICE CG83. Without clinical and cost effectiveness evidence  
19 for such a programme, it would be a significant challenge to commission such a service in an  
20 NHS that is driven to commission both clinical and specialist services with an established  
21 evidence base. The focus of the clinicians must be to ensure that clinical guidelines have a  
22 robust and strong evidence base to maximise their implementation and this will result in an  
23 enhancement in patient care that will be both clinical and cost effective.  
24  
25  
26  
27  
28  
29  
30  
31  
32  
33  
34  
35  
36  
37  
38  
39  
40  
41  
42

## 43 **ACKNOWLEDGEMENTS**

44  
45 We thank the Intensive Care National Audit and Research Centre, and the Scottish Intensive  
46 Care Society Audit Group for assistance with database information for identification of  
47 organisations for participation. Furthermore we thank the various clinical and research  
48 network colleagues who assisted with promotion of the survey.  
49  
50  
51  
52  
53  
54  
55  
56

## 57 **CONTRIBUTORS**

1  
2  
3 BC, LD and NH contributed to the conception and design of the study. BC and AD analysed  
4  
5 the data. BC and NH interpreted the data. BC drafted the manuscript and all authors  
6  
7 critically revised for significant intellectual content and insight. All authors had full access to  
8  
9 all of the data and can take responsibility for the integrity and accuracy of data analysis.  
10  
11 Furthermore all authors gave final approval of the manuscript version for publication. BC  
12  
13 and NH are responsible for the overall content as guarantors.  
14  
15  
16  
17  
18  
19

## 20 **FUNDING**

21  
22 This research was supported by the National Institute for Health Research (NIHR) Biomedical  
23  
24 Research Centre at Guy's and St Thomas' NHS Foundation Trust and King's College London.  
25  
26 The views expressed are those of the author(s) and not necessarily those of the NHS, the  
27  
28 NIHR or the Department of Health. Additional support was received from the Lane Fox  
29  
30 Respiratory Unit Patients Association.  
31  
32  
33  
34  
35

## 36 **COMPETING INTERESTS**

37  
38 All authors have completed the Unified Competing Interest Form at  
39  
40 [www.icmje.org/COI\\_disclosure.pdf](http://www.icmje.org/COI_disclosure.pdf) (available from the corresponding author) and declare:  
41  
42 no support from any organisation for the submitted work; no financial relationships with  
43  
44 any organisations that might have an interest in the submitted work in the previous three  
45  
46 years; no spouse, partner or children have any financial relationships that may be relevant  
47  
48 to the submitted work; and no other non-financial interests that may be relevant to the  
49  
50 submitted work.  
51  
52  
53  
54  
55

## 56 **ETHICAL APPROVAL**

1  
2  
3 Ethical approval was not required for this study.  
4  
5  
6

7  
8 **DATA SHARING**  
9

10 No additional data available.  
11

12  
13  
14 **COPYRIGHT FOR PUBLICATION**  
15

16  
17 The Corresponding Author has the right to grant on behalf of all authors and does grant on  
18 behalf of all authors, a worldwide licence to the Publishers and its licensees in perpetuity, in  
19 all forms, formats and media (whether known now or created in the future), to i) publish,  
20 reproduce, distribute, display and store the Contribution, ii) translate the Contribution into  
21 other languages, create adaptations, reprints, include within collections and create  
22 summaries, extracts and/or, abstracts of the Contribution, iii) create any other derivative  
23 work(s) based on the Contribution, iv) to exploit all subsidiary rights in the Contribution, v)  
24 the inclusion of electronic links from the Contribution to third party material where-ever it  
25 may be located; and, vi) licence any third party to do any or all of the above.  
26  
27  
28  
29  
30  
31  
32  
33  
34  
35  
36  
37  
38  
39  
40

41 **What is already known on this topic**  
42

43 Survivors of critical illness demonstrate impairment of physical function, psychological well-  
44 being, cognitive function and health-related quality of life that are recognised clinical  
45 features of the post intensive care syndrome.  
46  
47  
48  
49  
50

51  
52 In the UK, rehabilitation following critical illness as a continuum that spans the whole  
53 patient pathway of recovery has been recommended in national guidance.  
54  
55  
56  
57  
58  
59  
60

**What this study adds**

Limited implementation of NICE CG83 is evident across the UK in terms of clinical follow-up and rehabilitation programmes.

Establishing robust evidence to support national guidelines will maximise implementation to ensure clinical and cost-effective patient care is delivered.

For peer review only

## References

1. Cheung A, Tansey C, Tomlinson G, et al. Two-Year Outcomes, Health Care Use, and Costs of Survivors of Acute Respiratory Distress Syndrome. *Am J Resp Crit Care Med* 2006;**174**(5):538-44 doi: 10.1164/rccm.200505-693OC[published Online First: Epub Date]].
2. Herridge MS, Tansey CM, Matté A, et al. Functional Disability 5 Years after Acute Respiratory Distress Syndrome. *N. Engl. J. Med.* 2011;**364**(14):1293-304 doi: doi:10.1056/NEJMoa1011802[published Online First: Epub Date]].
3. Hopkins RO, Weaver LK, Collingridge D, Parkinson RB, Chan KJ, Orme JF, Jr. Two-Year Cognitive, Emotional, and Quality-of-Life Outcomes in Acute Respiratory Distress Syndrome. *Am. J. Respir. Crit. Care Med.* 2005;**171**(4):340-47 doi: 10.1164/rccm.200406-763OC[published Online First: Epub Date]].
4. Needham DM, Dinglas VD, Morris PE, et al. Physical and Cognitive Performance of Patients with Acute Lung Injury 1 Year after Initial Trophic versus Full Enteral Feeding. EDEN Trial Follow-up. *Am. J. Respir. Crit. Care Med.* 2013;**188**(5):567-76 doi: 10.1164/rccm.201304-0651OC[published Online First: Epub Date]].
5. Needham DM, Davidson J, Cohen H, et al. Improving long-term outcomes after discharge from intensive care unit: Report from a stakeholders' conference. *Crit. Care Med.* 2012;**40**(2):502-09
6. Iwashyna TJ. Survivorship will be the defining challenge of critical care in the 21st century. *Ann. Intern. Med.* 2010;**153**(3):204-5 doi: 153/3/204 [pii] 10.1059/0003-4819-153-3-201008030-00013[published Online First: Epub Date]].
7. Camporota L, Hart N. Lung protective ventilation. *BMJ* 2012;**344**:e2491 doi: 10.1136/bmj.e2491[published Online First: Epub Date]].

- 1  
2  
3 8. NICE. *Rehabilitation after critical illness. NICE Clinical Guideline 83*: National Institute for  
4  
5 Health and Clinical Excellence, London, UK, 2009.  
6
- 7  
8 9. Connolly B, Denehy L, Brett S, Elliott D, Hart N. Exercise rehabilitation following hospital  
9  
10 discharge in survivors of critical illness: an integrative review. *Critical Care*  
11  
12 2012;**16**(3):R226  
13
- 14  
15 10. Griffiths J, Hatch R, Bishop J, et al. An exploration of social and economic outcome and  
16  
17 associated health-related quality of life after critical illness in general intensive care  
18  
19 unit survivors: a 12-month follow-up study. *Critical Care* 2013;**17**(3):R100  
20
- 21  
22 11. NHS Right Care Atlas of Variation. Accessed 13/11/13.; **Available at**  
23  
24 **<http://www.rightcare.nhs.uk/index.php/nhs-atlas/>**  
25
- 26  
27 12. Jones S, Green S, Clark A, et al. Pulmonary rehabilitation following hospitalisation for  
28  
29 acute exacerbation of COPD: referrals, uptake and adherence. *Thorax* 2013;doi:  
30  
31 **10.1136/thoraxjnl-2013-204227**  
32
- 33  
34 13. Steier J, Martin A, Harris J, Jarrold I, Pugh D, Williams A. Predicted relative prevalence  
35  
36 estimates for obstructive sleep apnoea and the associated healthcare provision  
37  
38 across the UK. *Thorax* 2013 doi: 10.1136/thoraxjnl-2013-203887[published Online  
39  
40 First: Epub Date]].  
41
- 42  
43 14. Griffiths JA, Barber VS, Cuthbertson BH, Young JD. A national survey of intensive care  
44  
45 follow-up clinics. *Anaesthesia* 2006;**61**(10):950-55 doi: 10.1111/j.1365-  
46  
47 2044.2006.04792.x[published Online First: Epub Date]].  
48
- 49  
50 15. Hodgkin KE, Nordon-Craft A, McFann KK, Mealer ML, Moss M. Physical therapy utilization  
51  
52 in intensive care units: Results from a national survey. *Crit. Care Med.*  
53  
54 2009;**37**(2):561-68  
55  
56  
57  
58  
59  
60

- 1  
2  
3 16. Lewis M. Intensive Care Unit Rehabilitation within the United Kingdom: Review.  
4  
5       Physiotherapy 2003;**89**(9):531-38  
6  
7  
8 17. Skinner EH, Berney S, Warrillow S, Denehy L. Rehabilitation and exercise prescription in  
9  
10       Australian intensive care units. Physiotherapy 2008;**94**(3):220-29  
11  
12 18. Appleton R, MacKinnon M, Booth M, Wells J, Quasim T. Rehabilitation within Scottish  
13  
14       intensive care units: a national survey. Journal of the Intensive Care Society  
15  
16       2011;**12**(3):221-27  
17  
18 19. Berry A, Cutler L, Himsworth A. National survey of rehabilitation after critical illness.  
19  
20       Journal of the Intensive Care Society 2013;**14**(4):334-39  
21  
22 20. Department of Health. *Critical Care Outreach 2003: Progress in Developing Services*.  
23  
24       Department of Health and Modernisation Agency. 2003  
25  
26  
27  
28  
29  
30  
31 21. Battle C. A randomised controlled trial examining the effect of a six week supervised  
32  
33       exercise programme on patient fitness and hospital related anxiety and depression  
34  
35       following an intensive care length of stay of greater than 48 hours.  
36  
37       ISRCTN11853373 2011:available at [www.controlled-trials.com/isrctn/pf/11853373](http://www.controlled-trials.com/isrctn/pf/11853373)  
38  
39  
40 22. Griffiths R. Rehabilitating Muscle After Intensive Care (REMAIC) NCT01063738  
41  
42       2010:available at [www.controlled-trials.gov/ct2/show/record/NCT01063738](http://www.controlled-trials.gov/ct2/show/record/NCT01063738)  
43  
44  
45 23. O'Neill B. Exercise After Intensive Care Unit: a Randomised Controlled Trial (REVIVE)  
46  
47       NCT01463579 2011:available at [www.clinicaltrials.gov/ct2/show/NCT01463579](http://www.clinicaltrials.gov/ct2/show/NCT01463579)  
48  
49  
50 24. Battle C, James K, Temblett P, Hutchings H. Early results of a 6-week exercise  
51  
52       programme in post-ICU patients. Critical Care 2013;**17**(Suppl 2):P541  
53  
54  
55 25. Medical Research Council: Developing and evaluating complex interventions: new  
56  
57       guidance. Available at  
58  
59  
60



1  
2  
3 <http://www.mrc.ac.uk/Utilities/Documentrecord/index.htm?d=MRC004871>; **Accessed**

4  
5  
6 **d 26th October 2013**

- 7  
8 26. Herridge M. The challenge of designing a post-critical illness rehabilitation intervention.  
9  
10 *Critical Care* 2011;**15**(5):1002
- 11  
12 27. Connolly B, Jones G, Curtis A, et al. Clinical predictive value of manual muscle strength  
13 testing during critical illness: an observational cohort study. *Critical Care*  
14  
15 2013;**17**(5):R229
- 16  
17 28. Puthuchery ZA, Rawal J, McPhail M, et al. Acute skeletal muscle wasting in critical  
18 illness. *JAMA* 2013;**310**(15):1591-600 doi: 10.1001/jama.2013.278481[published  
19 Online First: Epub Date]].
- 20  
21 29. Spruit MA, Singh SJ, Garvey C, et al. An Official American Thoracic Society/European  
22 Respiratory Society Statement: Key Concepts and Advances in Pulmonary  
23 Rehabilitation. *Am. J. Respir. Crit. Care Med.* 2013;**188**(8):e13-e64 doi:  
24 10.1164/rccm.201309-1634ST[published Online First: Epub Date]].
- 25  
26 30. Department of Health. *Comprehensive Critical Care: A Review of Adult Critical Care*  
27 *Services*. London. 2000.
- 28  
29 31. Prinjha S, Field K, Rowan K. What patients think about ICU follow-up services: a  
30 qualitative study. *Critical Care* 2009;**13**:R46
- 31  
32 32. Cuthbertson BH, Rattray J, Campbell MK, et al. The PRaCTICaL study of nurse led,  
33 intensive care follow-up programmes for improving long term outcomes from critical  
34 illness: a pragmatic randomised controlled trial. *BMJ* 2009;**339**:b3723 doi:  
35 10.1136/bmj.b3723[published Online First: Epub Date]].
- 36  
37 33. Grimshaw J, Russell I. Effect of clinical guidelines on medical practice: a systematic  
38 review of rigorous evaluations. *The Lancet* 1993;**342**:1317-22
- 39  
40  
41  
42  
43  
44  
45  
46  
47  
48  
49  
50  
51  
52  
53  
54  
55  
56  
57  
58  
59  
60

- 1  
2  
3 34. McKinlay J, Link C, Feund K, Marceau L, O'Donnell A, Lutfey K. Sources of Variation in  
4  
5 Physician Adherence with Clinical Guidelines: Results from a Factorial Experiment. J.  
6  
7 Gen. Intern. Med. 2007;**22**(3):289-06  
8  
9  
10 35. Cabana MD, Rand CS, Powe NR, et al. Why don't physicians follow clinical practice  
11  
12 guidelines? A framework for improvement. JAMA 1999;**282**(15):1458-65 doi:  
13  
14 10.1001/jama.282.15.1458[published Online First: Epub Date] | .  
15  
16  
17 36. Man WD-C, Polkey MI, Donaldson N, Gray BJ, Moxham J. Community pulmonary  
18  
19 rehabilitation after hospitalisation for acute exacerbations of chronic obstructive  
20  
21 pulmonary disease: randomised controlled study. BMJ 2004;**329**(7476):1209 doi:  
22  
23 10.1136/bmj.38258.662720.3A[published Online First: Epub Date] | .  
24  
25  
26 37. NICE. *Chronic Obstructive Pulmonary Disease: Management of Chronic Obstructive*  
27  
28 *Pulmonary Disease in Adults in Primary and Secondary Care. NICE Clinical Guideline*  
29  
30 *CG101*: National Institute of Clinical Excellence, London, UK, 2010.  
31  
32  
33 38. Seymour JM, Moore L, Jolley CJ, et al. Outpatient pulmonary rehabilitation following  
34  
35 acute exacerbations of COPD. Thorax 2010;**65**(5):423-28 doi:  
36  
37 10.1136/thx.2009.124164[published Online First: Epub Date] | .  
38  
39  
40 39. TA139 Continuous positive airway pressure for the treatment of obstructive sleep  
41  
42 apnoea/hypopnoea syndrome. National Institute of Health and Clinical Excellence.  
43  
44 Accessed 13/11/13.; **Available at [www.nice.org.uk/TA139](http://www.nice.org.uk/TA139)**  
45  
46  
47 40. Burkell J. The dilemma of survey nonresponse. Library & Information Science Research  
48  
49 2003;**25**:239-63  
50  
51  
52 41. Rubenfeld GD. Surveys: An Introduction. Respir. Care 2004;**49**(10):1181-85  
53  
54  
55 42. Portney L, Watkins M. *Foundations of Clinical Research: Applications to Practice*. Third  
56  
57 Edition ed: Pearson Education Inc, NJ, USA, 2009.  
58  
59  
60

- 1  
2  
3 43. Intensive Care Society Core Standards for Intensive Care Units. Intensive Care Society.  
4  
5 Accessed 13/11/13.; Available at [http://www.ics.ac.uk/ics-homepage/guidelines-](http://www.ics.ac.uk/ics-homepage/guidelines-standards/)  
6 **standards/**  
7  
8  
9
- 10 44. Stenhammer C, Bokstrom P, Edlund B, Sarkadi A. Using different approaches to  
11 conducting postal questionnaires affected response rates and cost-efficiency. *J. Clin.*  
12 *Epidemiol.* 2011;**64**:1137-43  
13  
14  
15
- 16 45. Hocking J, Lim M, Read T, Hellard M. Postal surveys of physicians gave superior response  
17 rates over telephone interviews in a randomized trial. *J. Clin. Epidemiol.*  
18 *2006*;**59**:521-24  
19  
20  
21  
22  
23
- 24 46. Burns K, Duffett M, Kho M, et al. A guide for the design and conduct of self-administered  
25 surveys of clinicians. *Can. Med. Assoc. J.* 2008;**179**(3):245-52  
26  
27  
28
- 29 47. Dillman D. *Mail and internet surveys: the tailored design method.*: Hoboken, NJ: John  
30 Wiley & Sons 2007.  
31  
32  
33
- 34 48. Connolly B, Thompson A, Moxham J, Hart N. Difficulties of Patient Recruitment to a Post  
35 Critical Illness Rehabilitation Programme. *Am. J. Respir. Crit. Care Med.*  
36 *2012*;**185**:A3886  
37  
38  
39
- 40 49. Denehy L, Skinner E, Edbrooke L, et al. Exercise rehabilitation for patients with critical  
41 illness: a randomized controlled trial with 12 months of follow-up. *Critical Care*  
42 *2013*;**17**(4):R156  
43  
44  
45  
46  
47  
48  
49  
50  
51  
52  
53  
54  
55  
56  
57  
58  
59  
60

1  
2  
3 **FIGURE LEGENDS**  
4  
5  
6  
7

8 **Figure 1.** Flow-chart of survey distribution stages, response rates and promotional activities

9  
10 *Abbreviations: iCSP = interactive Chartered Society of Physiotherapy. ACPRC = Association of Chartered*  
11 *Physiotherapists in Respiratory Care.*  
12

13  
14  
15  
16  
17  
18  
19  
20  
21  
22  
23  
24  
25  
26  
27  
28  
29  
30  
31  
32  
33  
34  
35  
36  
37  
38  
39  
40  
41  
42  
43  
44  
45  
46  
47  
48  
49  
50  
51  
52  
53  
54  
55  
56  
57  
58  
59  
60

For peer review only

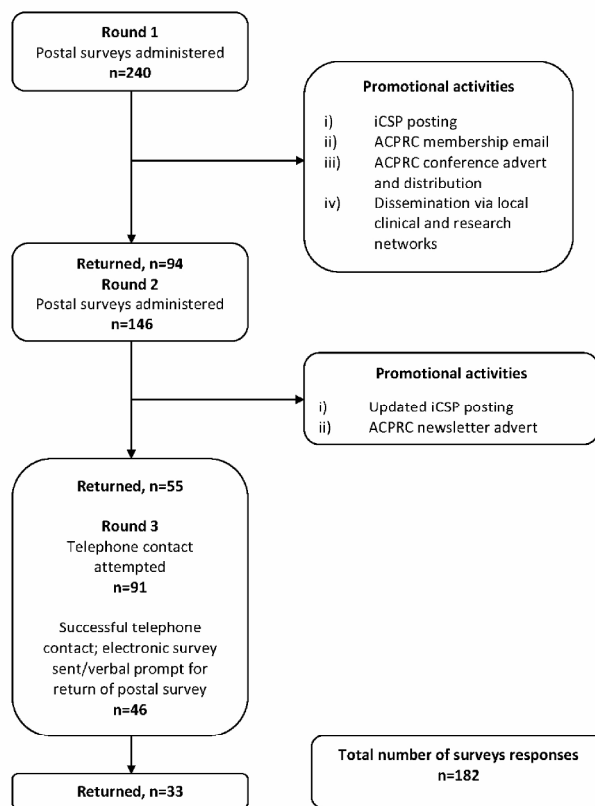

**Figure 1.** Flow-chart of survey distribution stages, response rates and promotional activities

Abbreviations: iCSP = interactive Chartered Society of Physiotherapy. ACPRC = Association of Chartered Physiotherapists in Respiratory Care.

Figure 1. Flow-chart of survey distribution stages, response rates and promotional activities  
Abbreviations: iCSP = interactive Chartered Society of Physiotherapy. ACPRC = Association of Chartered Physiotherapists in Respiratory Care.

208x278mm (300 x 300 DPI)

1  
2  
3 **A UK Survey of Rehabilitation Following Critical Illness: Implementation of NICE Clinical**  
4  
5 **Guidance 83 (CG83) Following Hospital Discharge**  
6  
7  
8  
9

10 **DATA SUPPLEMENT - REHABILITATION SURVEY**  
11

12 **REHABILITATION FOR SURVIVORS OF CRITICAL ILLNESS FOLLOWING HOSPITAL DISCHARGE**  
13

14 Many thanks for taking the time to complete this survey. It should take 10-20 minutes depending on  
15 the level of detail provided. Space is given for further information as necessary. There are some  
16 initial questions asking about your hospital and critical care unit(s), a short section asking about  
17 practice in relation to the third phase of rehabilitation outlined in CG83 (summarised below), and  
18 then greater detail surveying local rehabilitation services, if available, for survivors of critical illness  
19 following discharge from hospital.  
20  
21

22 It is anticipated that one potential outcome from this survey would be to compile a database of  
23 available rehabilitation services for patients across different areas of the country.  
24

25 If you would be happy to be contacted with regard information you have provided in this survey  
26 please include your details below. These details will not be passed on to any third person.  
27  
28  
29

---

30  
31 **AIMS**  
32

- 33 • To identify provision of post hospital discharge follow-up of critical illness patients in line with  
34 NICE CG83 guidelines
- 35
- 36 • To characterise specific rehabilitation services provided following hospital discharge for survivors  
37 of critical illness
- 38
- 39 • To investigate physical and non-physical components of rehabilitation programmes offered
- 40
- 41 • To establish outcome measures used to evaluate rehabilitation programmes
- 42
- 43 • To investigate factors influencing availability of these rehabilitation services
- 44  
45  
46

47 **Details**

48 Name:

49  
50  
51 Position:

52  
53 Name of Hospital:

54  
55 Email:

56  
57 Phone:  
58  
59  
60

RFCI Survey, v3, March 2013.

Bronwen Connolly, Clinical Research Fellow, Lane Fox Respiratory Unit, St.Thomas' Hospital, Westminster Bridge Rd, London, SE1 7EH.

**For peer review only - <http://bmjopen.bmj.com/site/about/guidelines.xhtml>**

# Rehabilitation care pathway

## Definitions

- Short clinical assessment: a brief clinical assessment to identify patients who may be at risk of developing physical and non-physical morbidity.
- Comprehensive clinical assessment: a more detailed assessment to determine the rehabilitation needs of patients who have been identified as being at risk of developing physical and non-physical morbidity.
- Functional assessment: an assessment to examine the patient's daily functional ability.
- Short-term rehabilitation goals: goals for the patient to reach before they are discharged from hospital.
- Medium-term rehabilitation goals: goals to help the patient return to their normal activities of daily living after they are discharged from hospital.
- Physical morbidity: problems such as muscle loss, muscle weakness, musculoskeletal problems including contractures, respiratory problems, sensory problems, pain, and swallowing and communication problems.
- Non-physical morbidity: psychological, emotional and psychiatric problems, and cognitive dysfunction.
- Multidisciplinary team (MDT): a team of healthcare professionals with the full spectrum of clinical skills needed to offer holistic care to patients with complex problems. The team may be a group of people who normally work together or who only work together intermittently.

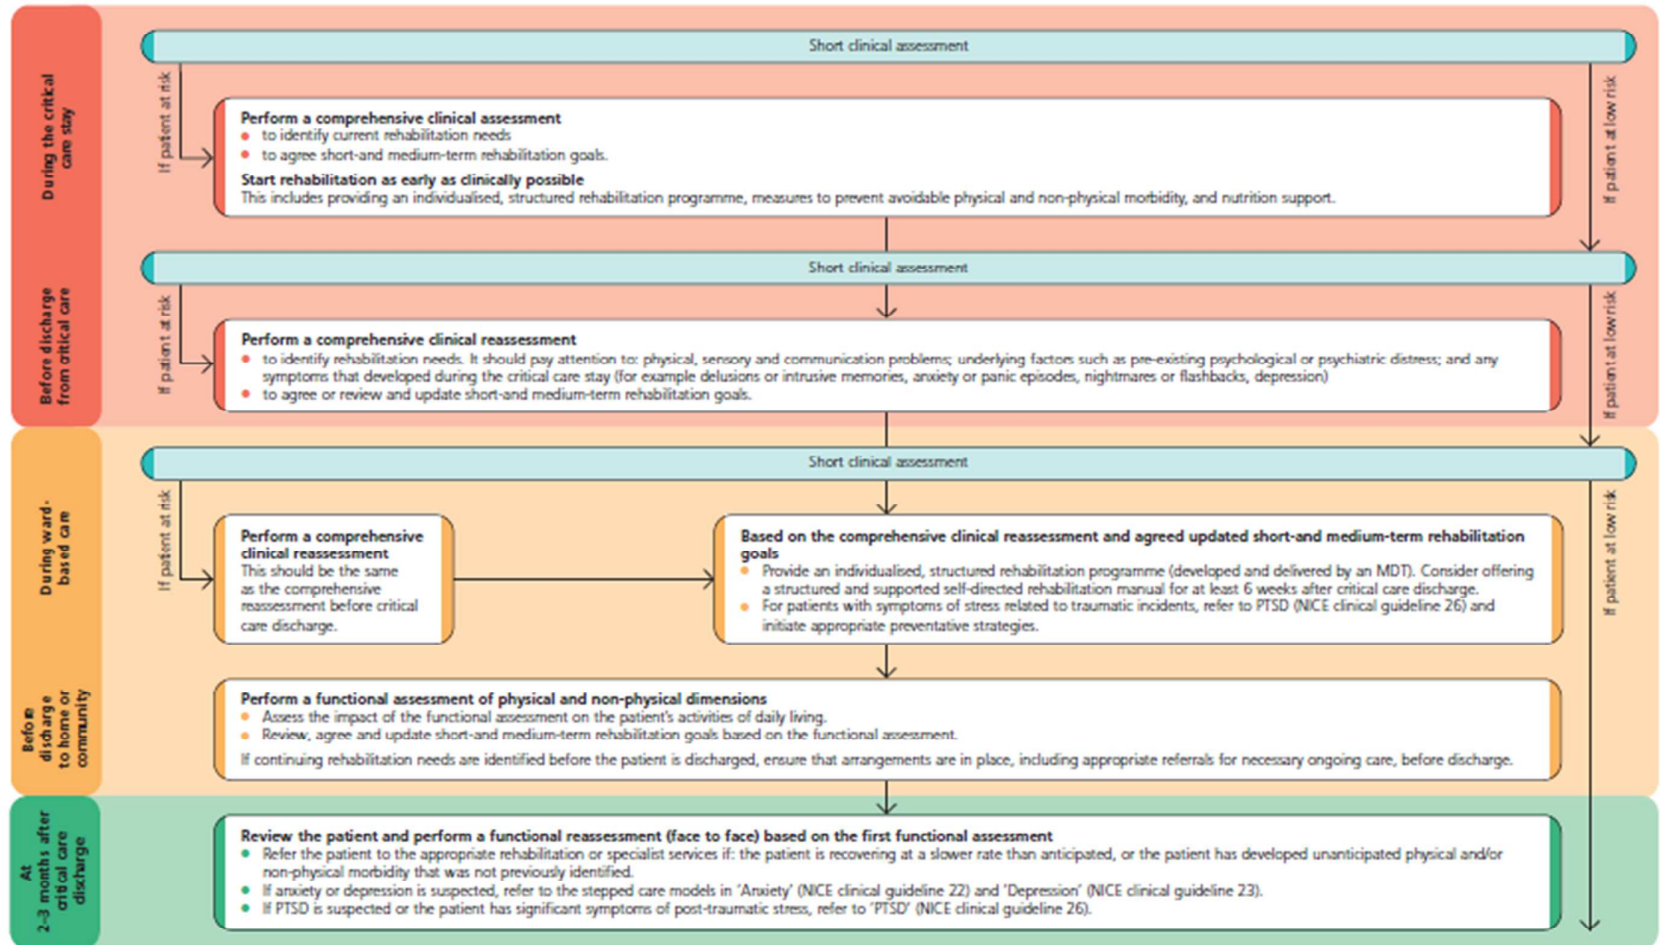

Full guideline available at <http://publications.nice.org.uk/rehabilitation-after-critical-illness-cg83>

RFCI Survey, v3, March 2013.

Bronwen Connolly, Clinical Research Fellow, Lane Fox Respiratory Unit, St.Thomas' Hospital, Westminster Bridge Rd, London, SE1 7EH.

1  
2  
3  
4  
5  
6  
7  
8  
9  
10  
11  
12  
13  
14  
15  
16  
17  
18  
19  
20  
21  
22  
23  
24  
25  
26  
27  
28  
29  
30  
31  
32  
33  
34  
35  
36  
37  
38  
39  
40  
41  
42  
43  
44  
45  
46  
47  
48  
49  
50  
51  
52  
53  
54  
55  
56  
57  
58  
59  
60

**SECTION 1 YOUR CRITICAL CARE SERVICES**

- 1) Is your hospital a:
- Teaching (University) hospital
  - District General hospital
  - Other

2) Please indicate the number, size and speciality of any critical care areas in your hospital (include all individual intensive care unit (ICU, Level 3), high dependency unit (HDU, Level 2) and/or combined Level areas)

| CC area | Level | Speciality | Beds |
|---------|-------|------------|------|
| 1       |       |            |      |
| 2       |       |            |      |
| 3       |       |            |      |
| 4       |       |            |      |
| 5       |       |            |      |
| 6       |       |            |      |
| 7       |       |            |      |
| 8       |       |            |      |
| 9       |       |            |      |
| 10      |       |            |      |



**SECTION 2 FOLLOW-UP FOR POST CRITICAL ILLNESS PATIENTS (with reference to CG83)**

Are you involved in follow-up for post critical illness patients 2-3 months after discharge?

**YES**  (please go to Question 1.)      **NO**  (please go to SECTION 3)

1. What form does this follow-up take:

ICU follow-up clinic

Medical outpatient appointment (as part of other medical follow-up)

Telephone call

Postal survey

Rehabilitation class

Other (please specify)

.....

2. Who is involved in this follow-up?

Physiotherapist       Occupational Therapist

Critical Care Nurse       Critical Care Doctor

Psychologist       Dietician

Other (please specify)

.....

3. Does this follow-up involve a functional reassessment based on previous assessment at hospital discharge?

**YES**       **NO**

4. What else is covered in this follow-up?

Exercise capacity       Health-related quality of life

Psychological status       Nursing-related issues

Medical status       Diet/nutrition

Other (please specify)

.....

**SECTION 3 REHABILITATION SERVICES FOLLOWING CRITICAL ILLNESS**

**Does your hospital offer a rehabilitation programme following hospital discharge specifically for post critical illness patients as part of *routine* clinical practice?**

(separate to generic services such as intermediate care, supported discharge, hospital-at-home or similar)

**YES**  (please go to Question 1.) **NO**  (please go to Question 19.)

**1. Who is responsible for leading this rehabilitation programme?**

- |                               |                          |                           |                          |
|-------------------------------|--------------------------|---------------------------|--------------------------|
| Physiotherapist               | <input type="checkbox"/> | Critical Care Doctor      | <input type="checkbox"/> |
| Occupational Therapist        | <input type="checkbox"/> | Critical Care Nurse       | <input type="checkbox"/> |
| Speech and Language Therapist | <input type="checkbox"/> | Exercise/sports therapist | <input type="checkbox"/> |
| Other (please give detail)    | <input type="checkbox"/> |                           |                          |
- .....

**2. If a physiotherapist, is this.....**

- |                                           |                          |                                |                          |
|-------------------------------------------|--------------------------|--------------------------------|--------------------------|
| ICU physiotherapist                       | <input type="checkbox"/> | Rehabilitation physiotherapist | <input type="checkbox"/> |
| Current banding/position                  |                          | .....                          |                          |
| Duration of ICU rehabilitation experience |                          | .....                          |                          |

**3. How do you select patients for inclusion into the programme?**

Assessment measure (if applicable)

- |                                                 |                          |       |
|-------------------------------------------------|--------------------------|-------|
| Duration of mechanical ventilation in ICU       | <input type="checkbox"/> | ..... |
| Duration of ICU admission                       | <input type="checkbox"/> | ..... |
| Duration of hospital admission                  | <input type="checkbox"/> | ..... |
| Physical function at ICU discharge              | <input type="checkbox"/> | ..... |
| Muscle strength at ICU discharge                | <input type="checkbox"/> | ..... |
| Exercise capacity at ICU discharge              | <input type="checkbox"/> | ..... |
| Health-related quality of life at ICU discharge | <input type="checkbox"/> | ..... |
| Physical function at hospital discharge         | <input type="checkbox"/> | ..... |
| Muscle strength at hospital discharge           | <input type="checkbox"/> | ..... |

RFCI Survey, v3, March 2013.

Bronwen Connolly, Clinical Research Fellow, Lane Fox Respiratory Unit, St.Thomas' Hospital, Westminster Bridge Rd, London, SE1 7EH.

- Exercise capacity at hospital discharge  .....
- Health-related quality of life at hospital discharge  .....
- Not applicable – all post ICU patients are eligible  .....

Other/comments (please give detail)

.....

**FORMAT OF DELIVERY**

**4. Is your programme:**

- Home-based  Hospital-based  Community-based

Other/comments (please give detail)

.....

**5. In your programme, do patients exercise:**

- Under supervision  Independently  Combination

- Do you use an accompanying rehabilitation or exercise manual YES  NO

Other/comments (please give detail)

.....

**6. Is your programme:**

- A stand-alone programme for post critical illness patients

- Part of existing rehabilitation services including patients with other disease groups

If so which

.....

Other/comments (please give detail)

.....

**7. At what time point post hospital discharge does the programme commence:**

- Immediately post hospital discharge  One week post hospital discharge

- Two weeks post hospital discharge  One month post hospital discharge

- 2-3 months post hospital discharge

RFCI Survey, v3, March 2013.

Bronwen Connolly, Clinical Research Fellow, Lane Fox Respiratory Unit, St.Thomas' Hospital, Westminster Bridge Rd, London, SE1 7EH.

Other/comments (please give detail)

.....

Does your service have a waiting list: YES  NO

If so, how long? .....

### STRUCTURE

8. How many sessions are in the rehabilitation programme e.g. 12 sessions, 16 sessions?

.....

9. How often are the sessions?

Weekly  Twice-weekly  Fortnightly

Other

.....

10. How long is each session?

30 minutes  45minutes  1 hour

Other

.....

11. Is this a: Rolling programme  Stand alone

12. How many patients are in the group?

.....

What is the staff:patient ratio?

.....

13. Do patients exercise in a: Pre-determined circuit  Patient-specific plan

Other

.....

### CONTENT

14. Does your rehabilitation programme include an exercise component

YES  (please continue) NO  (please go to Question 17.)

What exercises are included (please tick all that apply)?

| <u>Cardiovascular</u> |                          | <u>Strength</u>        |                          | <u>Balance</u> |                          | <u>Functional</u>                        |
|-----------------------|--------------------------|------------------------|--------------------------|----------------|--------------------------|------------------------------------------|
| Step-ups              | <input type="checkbox"/> | Lower limb             | <input type="checkbox"/> | Static         | <input type="checkbox"/> | Sit-to-stand <input type="checkbox"/>    |
| Treadmill             | <input type="checkbox"/> | Upper limb             | <input type="checkbox"/> | Dynamic        | <input type="checkbox"/> | Timed Up and Go <input type="checkbox"/> |
| Static bike           | <input type="checkbox"/> | Free weights           | <input type="checkbox"/> |                |                          | Walking <input type="checkbox"/>         |
| Cross-trainer         | <input type="checkbox"/> | Theraband/<br>resisted | <input type="checkbox"/> |                |                          |                                          |

Other/comments (please give detail)

---

How are these exercises prescribed?

- |                                         |                          |                                    |                          |
|-----------------------------------------|--------------------------|------------------------------------|--------------------------|
| Results of walking tests                | <input type="checkbox"/> | Results of balance assessment      | <input type="checkbox"/> |
| Results of physical function assessment | <input type="checkbox"/> | Repetition maximum principle       | <input type="checkbox"/> |
| Target heart rate                       | <input type="checkbox"/> | Target Borg (please specify range) | <input type="checkbox"/> |
| Clinician judgement                     | <input type="checkbox"/> |                                    |                          |

Other/comments (please give detail)

---

15. How do you monitor and/or progress exercise intensity during the exercise session?

- |                         |                          |                                           |                          |      |                          |
|-------------------------|--------------------------|-------------------------------------------|--------------------------|------|--------------------------|
| Heart rate targets      | <input type="checkbox"/> | SpO <sub>2</sub>                          | <input type="checkbox"/> | Borg | <input type="checkbox"/> |
| Visual analogue scale   | <input type="checkbox"/> | Clinical observation/judgement of patient | <input type="checkbox"/> |      |                          |
| Patient verbal feedback | <input type="checkbox"/> | No formal monitoring                      | <input type="checkbox"/> |      |                          |

Reassessment of baseline measures

Other/comments (please give detail)

---

16. Does your rehabilitation programme include an education component

YES  NO

If YES....what topics are included

Subject Delivered by (please list MDT member)

Exercise  .....

Stress management  .....

Nutrition  .....

Return to work  .....

Energy conservation  .....

Medications  .....

What to expect of recovery  .....

Motivational coaching/training  .....

Other (please give detail)

.....

**EVALUATION**

17. What outcome measures do you use with patients participating in your rehabilitation programme?

Strength-based e.g. repetition maximum, maximum weight

Please specify.....

Exercise capacity e.g. field walking tests (e.g. 6 Minute Walk Test, cardiopulmonary exercise testing (VO<sub>2</sub>max)

Please specify.....

Health-related quality of life e.g. SF-36 survey, Hospital Anxiety and Depression scale

Please specify.....

Mental/cognitive assessment e.g. Montreal Cognition Assessment

Please specify.....

RFCI Survey, v3, March 2013.

Bronwen Connolly, Clinical Research Fellow, Lane Fox Respiratory Unit, St.Thomas' Hospital, Westminster Bridge Rd, London, SE1 7EH.

Functional performance e.g. Timed Up and Go, Short Physical Performance Battery

Please specify.....

Other (please specify)

18. Any other comments regarding your post critical illness rehabilitation programme?

.....

.....

.....

**NO AVAILABLE REHABILITATION SERVICE**

19. If the answer to offering a rehabilitation service/programme at the start of this section was 'NO' please give details as to limiting factors for availability of these services.....

**All reason**    **Main reason**  
 (tick all that apply)    (tick one only)

- Lack of sufficient staff numbers
- Lack of suitably trained staff
- Lack of available space/venue
- No evidence to suggest benefit
- Lack of funding
- Not considered required service at managerial level
- Insufficient patient numbers to justify
- Not sure what to include in a rehabilitation programme
- Resources prioritised to other patient groups/clinical areas
- Extra-contractual (out-of-area) patient caseload
- Other (please specify)

.....

20. Do you refer ICU patients routinely into other rehabilitation programmes/services, either in-patient or community-based?

RFCI Survey, v3, March 2013.

Bronwen Connolly, Clinical Research Fellow, Lane Fox Respiratory Unit, St.Thomas' Hospital, Westminster Bridge Rd, London, SE1 7EH.

1  
2  
3  
4  
5  
6  
7  
8  
9  
10  
11  
12  
13  
14  
15  
16  
17  
18  
19  
20  
21  
22  
23  
24  
25  
26  
27  
28  
29  
30  
31  
32  
33  
34  
35  
36  
37  
38  
39  
40  
41  
42  
43  
44  
45  
46  
47  
48  
49  
50  
51  
52  
53  
54  
55  
56  
57  
58  
59  
60

YES  (please continue) NO  (please go to Question 21.)

Pulmonary rehabilitation  Cardiac rehabilitation

Exercise on prescription (or similar)  Community gym sessions

Other (please specify)  
.....

21. Does your organisation offer a post hospital discharge rehabilitation programme to survivors of critical illness as part of a research study?

YES  NO

If able, please provide contact detail for lead researcher  
.....

**(End of survey – many thanks for completing)**



1  
2  
3 **Rehabilitation Following Critical Illness: The Failure to Implement NICE Clinical Guidance**  
4  
5 **83 (CG83) in the UK**  
6  
7  
8  
9

10 **DATA SUPPLEMENT**  
11

12  
13  
14  
15 **E1. Post hospital discharge follow-up services and rehabilitation programmes**  
16

17  
18  
19 Figure E1 reports available follow-up services and rehabilitation programmes for survivors of  
20  
21  
22  
23  
24  
25  
26  
27  
28  
29  
30  
31  
32  
33  
34  
35  
36  
37  
38  
39  
40  
41  
42  
43  
44  
45  
46  
47  
48  
49  
50  
51  
52  
53  
54  
55  
56  
57  
58  
59  
60  
critical illness post hospital discharge.

30  
31  
32  
33  
34  
35  
36  
37  
38  
39  
40  
41  
42  
43  
44  
45  
46  
47  
48  
49  
50  
51  
52  
53  
54  
55  
56  
57  
58  
59  
60  
**E2. Detail on characteristics of available post hospital discharge rehabilitation programmes for survivors of critical illness**

*Leadership of, and enrolment into, post hospital discharge rehabilitation programmes*

In the majority of cases (n=9) this was a senior ICU physiotherapist (median (IQR) duration ICU experience 7.0 (4.0-13.0) years). A rehabilitation physiotherapist led one programme. One programme reported additional involvement of an occupational therapist and a fitness instructor with three including critical care nurses. There were no other MDT members reported. Limited data were provided regarding enrolment criteria of patients into available rehabilitation programmes (*Table E1*).

**Table E1.** Enrolment criteria for post hospital discharge rehabilitation programmes

| Eligibility criteria                    | n (%)    | Detail of assessment measure                                                                                                                                                                                                                                                                                                |
|-----------------------------------------|----------|-----------------------------------------------------------------------------------------------------------------------------------------------------------------------------------------------------------------------------------------------------------------------------------------------------------------------------|
| Duration mechanical ventilation         | 7 (70.0) | >5 days; >4 days; >3 days; 48hours                                                                                                                                                                                                                                                                                          |
| Duration ICU Admission                  | 3 (30.0) | >5 days; >4 days                                                                                                                                                                                                                                                                                                            |
| Duration hospital admission             | 2 (20.0) | "lengthened"                                                                                                                                                                                                                                                                                                                |
| Physical function at ICU discharge      | 2 (20.0) | "reduced from pre-admission"                                                                                                                                                                                                                                                                                                |
| Muscle strength at ICU discharge        | 2 (20.0) | No detail provided                                                                                                                                                                                                                                                                                                          |
| Exercise capacity at ICU discharge      | 2 (20.0) | No detail provided                                                                                                                                                                                                                                                                                                          |
| HRQL at ICU discharge                   | 0        | -                                                                                                                                                                                                                                                                                                                           |
| Physical function at hospital discharge | 4 (40.0) | No detail provided                                                                                                                                                                                                                                                                                                          |
| Muscle strength at hospital discharge   | 3 (30.0) | No detail provided                                                                                                                                                                                                                                                                                                          |
| Exercise capacity at hospital discharge | 3 (30.0) | No detail provided                                                                                                                                                                                                                                                                                                          |
| HRQL at hospital discharge              | 1 (10.0) | No detail provided                                                                                                                                                                                                                                                                                                          |
| All patients eligible                   | 1 (10.0) | "any ITU stay"                                                                                                                                                                                                                                                                                                              |
| Other                                   | 2 (20.0) | "those with profound weakness or functional limitation regardless of LOS";<br><br>"screen for low or high risk throughout ICU/hospital stay. If high risk, exercise plan, goals and rehab class if suitable. All plus 2 day ICU are automatically sent SF8 and depending on score, either 1:1 follow up or group follow-up" |

n=10 responses. Multiple criteria could be reported per response.

Abbreviations: ICU/ITU = intensive care/therapy unit. HRQL = health-related quality of life. LOS = length of stay. SF8 = Short Form-8 (health-related quality of life survey).

### *Format and structure of post hospital discharge rehabilitation programmes*

Of the ten rehabilitation programmes, nine were hospital-based and one was home-based. Patients exercised under supervision in four programmes, and with a combination of supervised and independent exercise in the remaining six. Only one programme used an accompanying rehabilitation manual, however three others reported providing printed, individualised home exercises for patients. All programmes were designed specifically for post critical illness patients. None were combined with existing disease-specific services such as pulmonary or cardiac rehabilitation. Programmes started immediately (n=4), at one week (n=1), within two weeks (n=3), within one month (n=1) and at 2-3 months (n=1) post hospital discharge. The number of sessions in each programme varied from 6 to 12, excluding assessment sessions. Data were absent for two programmes. Three programmes had the capacity and flexibility to allow patients to continue until individual goals or target physical function level had been achieved. Typically sessions ran weekly (n=7) or twice-weekly (n=3). All programmes included sessions of one hour duration. Eight programmes were 'rolling' programmes and patients could start and finish the programme at any point in time. One was stand-alone such that cohorts of post critical illness patients all started and completed programmes together. No enrolment, initiation timing, frequency or duration data were reported for one programme.

### *Content and monitoring of post hospital discharge rehabilitation programmes*

All rehabilitation programmes included an exercise component, involving a combination of cardiovascular, muscle strength, whole body balance and functional activity (*Table E2*). Nine programmes incorporated at least two different forms of exercise prescription during the programme usually based on clinician judgement, sometime informed by results of walking

1  
2  
3 tests and physical function assessment. All programmes included at least two forms of  
4  
5 patient monitoring during exercise sessions, based on a range of physiological and clinical  
6  
7 factors. Seven programmes used target rates of perceived exertion with four programmes  
8  
9 using oxygen saturation levels and 3 programmes monitoring heart rate. In contrast,  
10  
11 patient-related parameters were adopted in 8 programmes which monitored exercise  
12  
13 performance based on verbal feedback of the patient, 6 based on clinician judgement of the  
14  
15 patient and 2 based on visual analogue scales undertaken by the patient.  
16  
17  
18  
19  
20

21  
22 Surprisingly, less than half of all programmes included an education component (n=4). A  
23  
24 range of topics were covered including exercise, stress management and relaxation,  
25  
26 nutrition, return to work, energy conservation, medications, recovery following critical  
27  
28 illness, smoking cessation, managing breathlessness and breathing control, delivered  
29  
30 predominantly by physiotherapists but with additional input from occupational therapist  
31  
32 and nursing colleagues.  
33  
34  
35  
36  
37

### 38 *Group size*

39  
40 Group size and staff-to-patient ratio was also highly variable between the 10 post  
41  
42 rehabilitation programmes. One programme incorporated a 1:1 staff-to-patient ratio whilst  
43  
44 another adopted a flexible approach that depended on the complexity of the patient and  
45  
46 individual rehabilitation needs. Across the remaining programmes group sizes ranged from  
47  
48 5 to 14 patients with one qualified staff member for every 3 patients. Seven of the ten  
49  
50 programmes adopted patient-specific exercise plans, whilst the remaining three reported  
51  
52 that patients exercised in a pre-determined circuit.  
53  
54  
55  
56  
57  
58  
59  
60

**Table E2.** Exercise component and evaluation of post hospital discharge rehabilitation programmes

| Category of exercise | Specific exercise                                                   | n (%)      |
|----------------------|---------------------------------------------------------------------|------------|
| Cardiovascular       | Static bike                                                         | 10 (100.0) |
|                      | Step-ups                                                            | 9 (90.0)   |
|                      | Treadmill                                                           | 7 (70.0)   |
|                      | Cross-trainer                                                       | 2 (20.0)   |
| Strength             | Lower limb                                                          | 10 (100.0) |
|                      | Upper limb                                                          | 10 (100.0) |
|                      | Theraband/resistance                                                | 9 (90.0)   |
|                      | Free weights                                                        | 7 (70.0)   |
| Balance              | Dynamic                                                             | 9 (90.0)   |
|                      | Static                                                              | 5 (50.0)   |
| Functional           | Sit-to-stand                                                        | 8 (80.0)   |
|                      | Walking                                                             | 6 (60.0)   |
|                      | Timed Up And Go                                                     | 2 (20.0)   |
| Outcome              | Detail of outcome measure                                           | n (%)      |
| HRQL                 | SF-36, HADS, EQ5D, FIM, SF-8                                        | 10 (100.0) |
| Exercise capacity    | 6MWT; ISWT                                                          | 9 (90.0)   |
| Other                | Achievement of patient-specific goals; BMI; Impacts of Events Score | 3 (30.0)   |
| Functional           | TUAG; patient-specific goals                                        | 2 (20.0)   |
| Strength             | 2 minute step-ups                                                   | 1 (10.0)   |
| Mental/cognitive     | -                                                                   | 0          |

For exercise component and outcome measures, n=frequency of reported occurrence out of 10 responses. Multiple options could be listed per response.

*Abbreviations: HRQL = health-related quality of life. 6MWT = Six Minute Walk Test. ISWT = Incremental Shuttle Walk Test. SF-36 = Short Form 36. HADS = Hospital Anxiety and Depression Scale. EQ5D = EuroQol 5 Dimensions. FIM = Functional Independence Measure. SF-8 = Short Form 8. TUAG = Timed Up And Go. BMI = body mass index.*

1  
2  
3 *Evaluation of post hospital discharge rehabilitation programmes*  
4

5 Four of the programmes reported reassessment of baseline measures as a form of  
6 evaluation of the programme. However, subjective clinician judgement was the most  
7 commonly utilised form of evaluation followed by the objective changes in walking tests and  
8 physical function. Physiological parameters, such as target perceived rate of exertion and  
9 heart rate, and results of balance assessments were used infrequently in the evaluation of  
10 the response to the rehabilitation programme. Exercise capacity and health-related quality  
11 of life outcome measures were the most commonly utilised. Interestingly, none of the  
12 programmes incorporated the use of the repetition maximum principle to prescribe  
13 strengthening exercises.  
14  
15  
16  
17  
18  
19  
20  
21  
22  
23  
24  
25  
26  
27  
28

29 **E3. Individual comments made by respondents regarding barriers to offering post**  
30 **hospital rehabilitation discharge services and use of alternative rehabilitation streams.**  
31  
32  
33  
34  
35  
36  
37

38 The following free-text comments were made by respondents regarding barrier to offering  
39 specific post hospital discharge rehabilitation programmes and further elucidate the themes  
40 of funding restriction, resource allocation/availability (including staffing) and strategic  
41 management priorities as key limiting factors. (Note: words in italics added by the author for  
42 full interpretation):  
43  
44  
45  
46  
47  
48  
49

50 "...we at times struggle to fight for staff for in pt rehab (*in-patient rehabilitation*) let  
51 alone fight for a budget for op (*out-patient*) care  
52

53  
54 "...we run a voluntary f-u (*follow-up*) clinic but have had to withdraw the rehab  
55 (*rehabilitation*) and psych (*psychology*) elements due to no (sic) support from  
56 therapy managers  
57  
58  
59  
60

1  
2  
3 "...despite extensive work the business case was declined  
4

5 "...a rehab (*rehabilitation*) programme was run for 12m using charitable funds  
6 money. Ongoing funding was not secured as it was not deemed a Trust priority  
7

8  
9 "...historically no service available, no need established by current ICU services  
10

11 "...and not considered required at managerial level; Some years ago charitable  
12 funding was available to open follow-up clinic to include rehab (*rehabilitation*)  
13 service but Trust board refused the 2 year funding as they could not commit to  
14 continuing to fund the service once the charitable monies expired. So the reason  
15 we didn't introduce the service at that time was a mix of funding and managerial  
16 issues. Currently I would think staffing would be another issue.  
17  
18

19 "...previously ran post ICU rehab (*rehabilitation*) class but had to stop because reduced  
20 staffing (prioritising in-pt) and difficult to get numbers (no transport provided)  
21  
22

23 "...The main barriers to this aspect are time constraints, lack of staff and funding  
24 alongside limited knowledge of potential co-morbidities following ICU stay. Critical  
25 Care follow up clinics do not take place in an adequate time frame in this trust and  
26 as such many people do not attend, therefore we are missing potential problems.  
27 Additionally the clinic is not an MDT run clinic, limiting clinical identification of  
28 potential problems.  
29  
30

31 "...absence of vertical integration of health and social care  
32

33  
34 "...not so much not considered as required - sure the team believe it's required just  
35 not enough resources  
36

37 "6.5WTE PT (6.5 *whole-time equivalent physiotherapists*) in team covering 7  
38 different ward specialities, 3x critical care areas, resp o/p (*respiratory out-*  
39 *patients*), resp pts (*respiratory patients*) in A&E/admissions  
40  
41  
42  
43  
44

45 Other comments described the interaction between acute and primary care services, which  
46 in some cases offer a route for ongoing rehabilitation input, and clinical and logistical factors  
47 for consideration in determining need for specific critical care services:  
48  
49  
50

51  
52 "...inpt (in-patient) and outpt (out-patient) services are provided by two separate  
53 organisations, therefore although the inpt (*in-patient*) team would like to provide a  
54 service the community team will not lend support  
55  
56

57 "...pt (*patient*) needs met by other community services available  
58  
59  
60

1  
2  
3  
4 "...not sure if we would have individual class therefore combined with PR  
5 (*pulmonary rehabilitation*); we would like to set one-up  
6

7  
8 "...numbers are very small and tends to be post-op (*post-operative*); back to  
9 baseline 5/7 (*at five days*). not seen need to provide service separate to our IRS (*in-*  
10 *patient rehabilitation or integrated respiratory service*)  
11

12  
13 "...We have a follow up clinic run by our CCORT (*critical care outreach team*), but  
14 no physical rehab (*rehabilitation*) post D/C (*discharge*) home (unless needing  
15 regular community physio (*physiotherapy*) input)  
16

17  
18 "...very structured in hospital critical care rehab (*rehabilitation*) service to  
19 maximise pt (*patient*) status at hospital d/c (*discharge*), has significantly reduced  
20 LOS (*length of stay*), readmissions to critical care, QOL (*quality of life*) scores and  
21 ongoing co-morbidity/health problems. Insufficient numbers for group rehab  
22 (*rehabilitation*) specific to CCD (*critical care disease*) post d/c (*discharge*)  
23

24  
25 "...patients who need long-term rehab (*rehabilitation*) are followed up by  
26 community staff  
27

28  
29 "...we use PR (*pulmonary rehabilitation*) programme for many post ITU patients  
30

31  
32 "...cardiac patients go to CR (*cardiac rehabilitation*)  
33  
34  
35  
36  
37  
38  
39  
40  
41  
42  
43  
44  
45  
46  
47  
48  
49  
50  
51  
52  
53  
54  
55  
56  
57  
58  
59  
60



1  
2  
3  
4  
5  
6  
7  
8  
9  
10  
11  
12  
13  
14  
15  
16  
17  
18  
19  
20  
21  
22  
23  
24  
25  
26  
27  
28  
29  
30  
31  
32  
33  
34  
35  
36  
37  
38  
39  
40  
41  
42  
43  
44  
45  
46  
47  
48  
49  
50  
51  
52  
53  
54  
55  
56  
57  
58  
59  
60

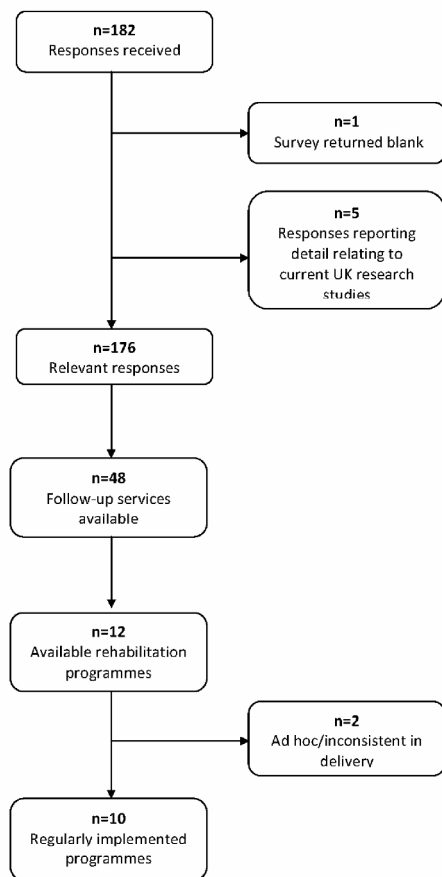

**Figure E1.** Flow-chart outlining available follow-up services and rehabilitation programmes for survivors of critical illness post hospital discharge

1

Figure E1. Flow-chart outlining available follow-up services and rehabilitation programmes for survivors of critical illness post hospital discharge  
208x278mm (300 x 300 DPI)
